# Supplementary material for: Design, Synthesis, In Vitro Antifungal Activity and Mechanism Study of the Novel 4-Substituted Mandelic Acid Derivatives
Source: MDPI journal article supplement (doi:10.3390/ijms24108898), 2023-05-17
Supplement: s1 [file ijms-2373867-supplementary.pdf › ijms-2373867-supplementary.pdf]

# Supplementary Materials

## Design, Synthesis, In Vitro Antifungal Activity and Mechanism Study of the Novel 4-Substituted Mandelic Acid Derivatives

Biao Chen <sup>1</sup>, Dandan Song <sup>2</sup>, Huabin Shi <sup>2</sup>, Kuai Chen <sup>2</sup>, Zhibing Wu <sup>2,\*</sup> and Huifang Chai <sup>1,\*</sup>

<sup>1</sup> School of Pharmacy, Guizhou University of Traditional Chinese Medicine, Guiyang 550025, China; gzdxcchenbiao@163.com

<sup>2</sup> State Key Laboratory Breeding Base of Green Pesticide and Agricultural Bioengineering, Key Laboratory of Green Pesticide and Agricultural Bioengineering, Ministry of Education, Center for R&D of Fine Chemicals of Guizhou University, Guiyang 550025, China; 15284637047@163.com (D.S.); shb1126@163.com (H.S.); m15185174268@163.com (K.C.)

\* Correspondence: zbwu@gzu.edu.cn (Z.W.); hfchai@gzy.edu.cn (H.C.)

|                                                                                                               |       |
|---------------------------------------------------------------------------------------------------------------|-------|
| 1. <sup>1</sup> H, <sup>13</sup> C NMR and HRMS data of the title compounds.....                              | 2-11  |
| 2. Copies of <sup>1</sup> H, <sup>13</sup> C, <sup>19</sup> F NMR, HRMS, and HPLC of the title compounds..... | 12-76 |
| 3. Crystallographic data of compound <b>E</b> <sub>9</sub> .....                                              | 77    |
| 4. The regression equation of the title compounds with EC <sub>50</sub> values .....                          | 78-82 |

## 1. $^1\text{H}$ , $^{13}\text{C}$ NMR, and HRMS data of the title compounds

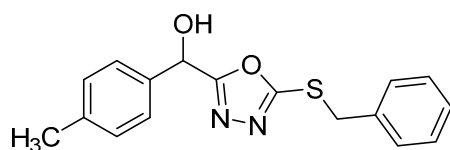

*data for E<sub>1</sub>*: A yellow solid, yield 56%, purity 99.5%, m.p. 95-96 °C.  $^1\text{H}$  NMR (400 MHz, DMSO- $d_6$ )  $\delta$  7.35-7.26 (m, 7 H, benzene H), 7.19 (d,  $J$  = 8.0 Hz, 2H benzene H), 6.69 (d,  $J$  = 8.0 Hz, 1H, OH), 5.95 (d,  $J$  = 4.0 Hz, 1H, CH), 4.44 (s, 2H, CH<sub>2</sub>), 2.29 (s, 3H, CH<sub>3</sub>);  $^{13}\text{C}$  NMR (101 MHz, DMSO- $d_6$ )  $\delta$  169.1, 163.9, 138.0, 136.9, 136.7, 129.5, 129.4, 129.0, 128.2, 126.8, 66.7, 36.2, 21.2; HRMS: calcd for C<sub>17</sub>H<sub>16</sub>N<sub>2</sub>O<sub>2</sub>S,  $[\text{M}+\text{H}]^+$  313.1005, found 313.1002.

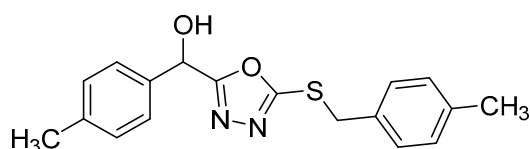

*Data for E<sub>2</sub>*: A yellow solid, yield 55%, purity 95.4%, m.p. 135-136 °C.  $^1\text{H}$  NMR (400 MHz, DMSO- $d_6$ )  $\delta$  7.32 (d,  $J$  = 12.0 Hz, 2H, benzene H), 7.20 (t,  $J$  = 8.0 Hz, 4H, benzene H), 7.07 (d,  $J$  = 8.0 Hz, 2H, benzene H), 6.66 (d,  $J$  = 4.0 Hz, 1H, OH), 5.94 (d,  $J$  = 8.0 Hz, 1H, CH), 4.40 (s, 2H, CH<sub>2</sub>), 2.30 (s, 3H, CH<sub>3</sub>), 2.25 (s, 3H, CH<sub>3</sub>);  $^{13}\text{C}$  NMR (101 MHz, DMSO- $d_6$ )  $\delta$  169.1, 163.9, 137.9, 137.5, 136.7, 133.8, 129.6, 129.5, 129.3, 126.8, 66.8, 36.1, 21.2; HRMS: calcd for C<sub>18</sub>H<sub>18</sub>N<sub>2</sub>O<sub>2</sub>S,  $[\text{M}+\text{H}]^+$  327.1162, found 327.1152.

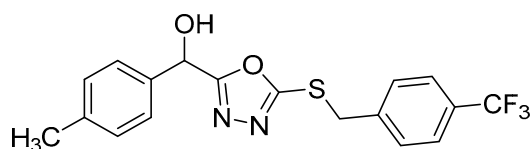

*data for E<sub>3</sub>*: A white solid, yield 38%, purity 99.7%, m.p. 117-118 °C.  $^1\text{H}$  NMR (400 MHz, DMSO- $d_6$ )  $\delta$  7.59 (dd,  $J$  = 20.0, 8.0 Hz, 4 H, benzene H), 7.3 (d,  $J$  = 8.0 Hz, 2 H, benzene H), 7.18 (d,  $J$  = 8.0 Hz, 2H, benzene H), 6.65 (d,  $J$  = 8.0 Hz, 1H, CH), 5.92 (d,  $J$  = 8.0 Hz, 1H, OH), 4.53 (s, 2H, CH<sub>2</sub>), 2.29 (s, 3H, CH<sub>3</sub>);  $^{13}\text{C}$  NMR (101 MHz, DMSO- $d_6$ )  $\delta$  169.2, 163.6, 142.2, 137.9, 136.6, 130.2, 129.5, 128.6 (q,  $J$  = 31.7 Hz), 126.8, 125.8 (q,  $J$  = 3.8 Hz), 66.6, 35.4, 21.2;  $^{19}\text{F}$  NMR (376 MHz, DMSO- $d_6$ )  $\delta$  -61.05; HRMS: calcd for C<sub>18</sub>H<sub>15</sub>F<sub>3</sub>N<sub>2</sub>O<sub>2</sub>S,  $[\text{M}+\text{H}]^+$  381.0879, found 381.0868.

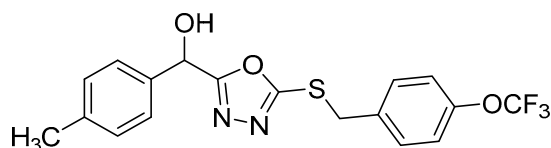

*data for E<sub>4</sub>*: A yellow solid, yield 56%, purity 93.5%, m.p. 140-141 °C. <sup>1</sup>H NMR (400 MHz, DMSO-*d*<sub>6</sub>) δ 7.48 (dd, *J* = 8.0, 4.0 Hz, 2H, benzene H), 7.31 (d, *J* = 8.0 Hz, 2H, benzene H), 7.25 (d, *J* = 8.0 Hz, 2H, benzene H), 7.19 (d, *J* = 8.0 Hz, 2H, benzene H), 6.65 (d, *J* = 8.0 Hz, 1H, OH), 5.93 (d, *J* = 4.0 Hz, 1H, CH), 4.48 (s, 2H, CH<sub>2</sub>), 2.29 (s, 3H, CH<sub>3</sub>); <sup>13</sup>C NMR (101 MHz, DMSO-*d*<sub>6</sub>) δ 169.2, 163.7, 148.2, 137.9, 136.7 (d, *J* = 5.0 Hz), 131.4, 129.5, 126.8, 121.5, 66.6, 35.2, 21.2; <sup>19</sup>F NMR (377 MHz, DMSO-*d*<sub>6</sub>) δ -56.8; HRMS: calcd for C<sub>18</sub>H<sub>16</sub>F<sub>3</sub>N<sub>2</sub>O<sub>3</sub>S, [M+H]<sup>+</sup> 397.0828, found 397.0818.

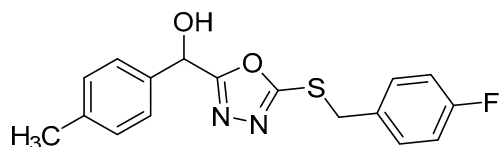

*data for E<sub>5</sub>*: A white solid, yield 58%, purity 96.1%, m.p. 132-133 °C. <sup>1</sup>H NMR (400 MHz, DMSO-*d*<sub>6</sub>) δ 7.41-7.36 (m, 2H, benzene H), 7.30 (d, *J* = 8.0 Hz, 2H, benzene H), 7.19 (d, *J* = 8.0 Hz, 2H, benzene H), 7.12-7.06 (m, 2H, benzene H), 6.65 (d, *J* = 4.0 Hz, 1H, OH), 5.92 (d, *J* = 8.0 Hz, 1H, CH), 4.44 (s, 2H, CH<sub>2</sub>), 2.30 (s, 3H, CH<sub>3</sub>); <sup>13</sup>C NMR (101 MHz, DMSO-*d*<sub>6</sub>) δ 169.1, 163.8, 162.0 (d, *J* = 244.1 Hz), 138.0, 136.7, 133.3 (d, *J* = 3.0 Hz), 131.5 (d, *J* = 8.2 Hz), 129.5, 126.8, 115.8 (d, *J* = 21.4 Hz), 66.6, 35.4, 21.2; <sup>19</sup>F NMR (377 MHz, DMSO-*d*<sub>6</sub>) δ -114.4; HRMS: calcd for C<sub>17</sub>H<sub>15</sub>FN<sub>2</sub>O<sub>2</sub>S, [M+H]<sup>+</sup> 331.0911, found 331.0902.

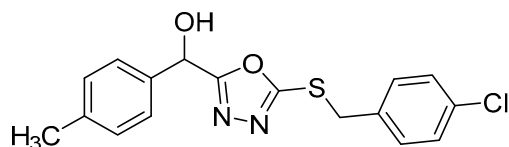

*data for E<sub>6</sub>*: A white solid, yield 39%, purity 96.8%, m.p. 114-115 °C. <sup>1</sup>H NMR (400 MHz, DMSO-*d*<sub>6</sub>) δ 7.40-7.29 (m, 6 H, benzene H), 7.19 (d, *J* = 8.0 Hz, 2 H, benzene H), 6.66 (d, *J* = 8.0 Hz, 1H, OH), 5.92 (d, *J* = 8.0 Hz, 1H, CH), 4.44 (s, 2H, CH<sub>2</sub>), 2.30 (s, 3H, CH<sub>3</sub>); <sup>13</sup>C NMR (101 MHz, DMSO-*d*<sub>6</sub>) δ 169.2, 163.7, 138.0, 136.6, 136.3, 132.8, 131.3, 129.5, 128.9, 126.8, 66.6, 35.4, 21.2; HRMS: calcd for C<sub>17</sub>H<sub>15</sub>ClN<sub>2</sub>O<sub>2</sub>S, [M+H]<sup>+</sup> 347.0616, found 347.0606.

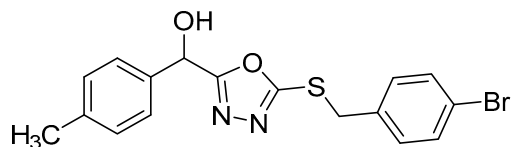

*data for E<sub>7</sub>*: A yellow solid, yield 67%, purity 98.9%, m.p. 143-144 °C. <sup>1</sup>H NMR (400 MHz, DMSO-*d*<sub>6</sub>) δ 7.37-7.29 (m, 6 H, benzene H), 7.19 (d, *J* = 8.0 Hz, 2 H, benzene H), 6.66 (d, *J* = 8.0 Hz, 1H, OH), 5.92 (d, *J* = 4.0 Hz, 1H, CH), 4.44 (s, 2H, CH<sub>2</sub>), 2.30 (s, 3H, CH<sub>3</sub>); <sup>13</sup>C NMR (101 MHz,

DMSO-*d*<sub>6</sub>)  $\delta$  169.2, 163.7, 138.0, 136.6, 136.2, 132.8, 131.3, 129.5, 128.9, 126.8, 66.6, 35.4, 21.2;

HRMS: calcd for C<sub>17</sub>H<sub>15</sub>BrN<sub>2</sub>O<sub>2</sub>S, [M+H]<sup>+</sup> 391.0110, found 391.0105.

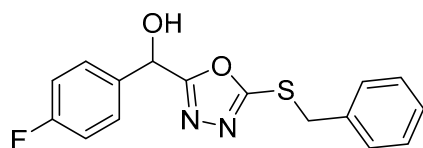

*data for E<sub>8</sub>*: A yellow solid, yield 77%, purity 99.4%, m.p. 92-93 °C. <sup>1</sup>H NMR (400 MHz, DMSO-*d*<sub>6</sub>)  $\delta$  7.29-7.24 (m, 5 H, benzene H), 7.10-7.06 (m, 2H, benzene H), 7.00-6.95 (m, 2H, benzene H), 5.96 (d, *J* = 4.0 Hz, 1H, OH), 4.74 (d, *J* = 4.0 Hz, 1H, CH), 3.96 (s, 2H, CH<sub>2</sub>); <sup>13</sup>C NMR (101 MHz, DMSO-*d*<sub>6</sub>)  $\delta$  170.3, 163.0, 160.6, 138.3, 137.8 (d, *J* = 2.9 Hz), 129.1, 129.0 (d, *J* = 8.2 Hz), 128.5, 127.4, 114.9 (d, *J* = 21.3 Hz), 72.5, 59.9; <sup>19</sup>F NMR (377 MHz, DMSO-*d*<sub>6</sub>)  $\delta$  -115.6; HRMS: calcd for C<sub>16</sub>H<sub>13</sub>FN<sub>2</sub>O<sub>2</sub>S, [M+H]<sup>+</sup> 317.0755, found 317.0753.

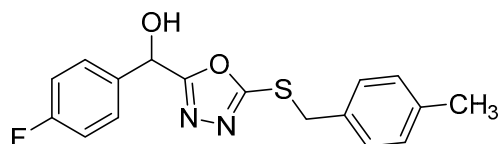

*data for E<sub>9</sub>*: A white solid, yield 78%, purity 99.5%, m.p. 169-170 °C. <sup>1</sup>H NMR (400 MHz, DMSO-*d*<sub>6</sub>)  $\delta$  7.51-7.46 (m, 2H, benzene H), 7.25-7.19 (m, 4H, benzene H), 7.08 (d, *J* = 8.0 Hz, 2H, benzene H), 6.78 (d, *J* = 4.0 Hz, 1H, OH), 6.00 (d, *J* = 4.0 Hz, 1H, CH), 4.41 (s, 2H, CH<sub>2</sub>), 2.25 (s, 3H, CH<sub>3</sub>); <sup>13</sup>C NMR (101 MHz, DMSO-*d*<sub>6</sub>)  $\delta$  168.8, 164.1, 163.6, 159.3, 135.9 (d, *J* = 2.9 Hz), 130.7, 130.3, 129.1 (d, *J* = 8.4 Hz), 115.8 (d, *J* = 21.5 Hz), 114.4, 66.1, 55.5, 35.9; <sup>19</sup>F NMR (377 MHz, DMSO-*d*<sub>6</sub>)  $\delta$  -114.1; HRMS: calcd for C<sub>17</sub>H<sub>15</sub>FN<sub>2</sub>O<sub>2</sub>S, [M+H]<sup>+</sup> 331.0911, found 331.0902.

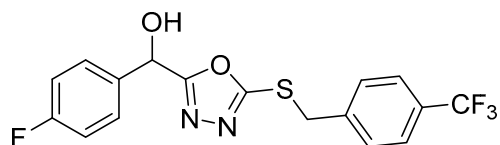

*data for E<sub>10</sub>*: A yellow solid, yield 88%, purity 96.9%, m.p. 74-75 °C. <sup>1</sup>H NMR (400 MHz, DMSO-*d*<sub>6</sub>)  $\delta$  7.62 (dd, *J* = 20.0, 8.0 Hz, 4 H, benzene H), 7.49-7.45 (m, 2 H, benzene H), 7.24-7.18 (d, 2H, benzene H), 6.79 (d, *J* = 8.0 Hz, 1H, OH), 5.99 (d, *J* = 4.0 Hz, 1H, CH), 4.54 (s, 2H, CH<sub>2</sub>), 2.29 (s, 3H, CH<sub>3</sub>); <sup>13</sup>C NMR (101 MHz, DMSO-*d*<sub>6</sub>)  $\delta$  169.0 (d, *J* = 0.5 Hz), 163.8, 162.4 (d, *J* = 244.1 Hz), 161.1, 142.2, 135.8 (d, *J* = 3.0 Hz), 130.2, 129.1 (d, *J* = 8.4 Hz), 125.8 (q, *J* = 3.8 Hz), 124.6 (q, *J* = 272.1 Hz), 115.7 (d, *J* = 21.6 Hz), 66.0, 35.4; <sup>19</sup>F NMR (376 MHz, DMSO-*d*<sub>6</sub>)  $\delta$  -61.0, -114.11; HRMS: calcd for C<sub>17</sub>H<sub>12</sub>F<sub>4</sub>N<sub>2</sub>O<sub>2</sub>S, [M+H]<sup>+</sup> 385.0628, found 385.0619.



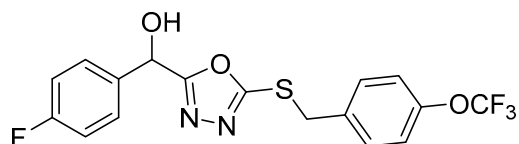

*data for E11:* A white solid, yield 28%, purity 99.3%, m.p. 66-67 °C.  $^1\text{H}$  NMR (400 MHz, DMSO- $d_6$ )  $\delta$  7.42-7.38 (m, 4H, benzene H), 7.17-7.13 (m, 4H, benzene H), 6.77 (d,  $J$  = 8.0 Hz, 1H, OH), 6.00 (d,  $J$  = 4.0 Hz, 1H, CH), 4.49 (s, 2H, CH<sub>2</sub>);  $^{13}\text{C}$  NMR (101 MHz, DMSO- $d_6$ )  $\delta$  163.9, 160.9, 136.7, 131.4, 131.0, 129.2 (d,  $J$  = 8.2 Hz), 129.0, 121.5, 115.7 (d,  $J$  = 21.6 Hz), 115.2 (d,  $J$  = 21.3 Hz), 66.1, 35.2;  $^{19}\text{F}$  NMR (377 MHz, DMSO- $d_6$ )  $\delta$  -56.8, -114.1; HRMS: calcd for C<sub>17</sub>H<sub>12</sub>F<sub>4</sub>N<sub>2</sub>O<sub>3</sub>S, [M+H]<sup>+</sup> 401.0578, found 401.0570.

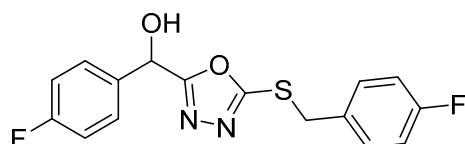

*data for E12:* A white solid, yield 71%, purity 98.8%, m.p. 63-64 °C.  $^1\text{H}$  NMR (400 MHz, DMSO- $d_6$ )  $\delta$  7.50-7.46 (m, 2H, benzene H), 7.40-7.33 (m, 2H, benzene H), 7.24-7.19 (m, 3H, benzene H), 7.12-7.08 (m, 1H, benzene H), 6.79 (d,  $J$  = 8.0 Hz, 1H, OH), 6.00 (d,  $J$  = 4.0 Hz, 1H, CH), 4.48 (s, 2H, CH<sub>2</sub>);  $^{13}\text{C}$  NMR (101 MHz, DMSO- $d_6$ )  $\delta$  169.1, 163.6, 135.8 (d,  $J$  = 3.0 Hz), 131.8 (d,  $J$  = 3.4 Hz), 130.7 (d,  $J$  = 8.2 Hz), 129.1 (d,  $J$  = 8.3 Hz), 125.0 (d,  $J$  = 3.8 Hz), 123.9, 115.9 (d,  $J$  = 2.8 Hz), 115.6, 66.1, 30.2 (d,  $J$  = 3.3 Hz);  $^{19}\text{F}$  NMR (377 MHz, DMSO- $d_6$ )  $\delta$  -115.7, -116.0; HRMS: calcd for C<sub>16</sub>H<sub>12</sub>F<sub>2</sub>N<sub>2</sub>O<sub>2</sub>S, [M+H]<sup>+</sup> 335.0660, found 335.0655.

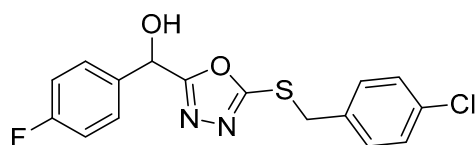

*data for E13:* A white solid, yield 38%, purity 96.6%, m.p. 82-83 °C.  $^1\text{H}$  NMR (400 MHz, DMSO- $d_6$ )  $\delta$  7.50-7.46 (m, 2H, benzene H), 7.39-7.32 (m, 4H, benzene H), 7.25-7.19 (m, 2H, benzene H), 6.78 (d,  $J$  = 4.0 Hz, 1H, OH), 6.00 (d,  $J$  = 4.0 Hz, 1H, CH), 4.45 (s, 2H, CH<sub>2</sub>);  $^{13}\text{C}$  NMR (101 MHz, DMSO- $d_6$ )  $\delta$  168.9, 163.9, 162.4 (d,  $J$  = 244.2 Hz), 136.2, 135.8, 132.8, 131.3, 129.1 (d,  $J$  = 8.4 Hz), 128.9, 115.7 (d,  $J$  = 21.6 Hz), 66.1, 35.4;  $^{19}\text{F}$  NMR (377 MHz, DMSO- $d_6$ )  $\delta$  -114.1; HRMS: calcd for C<sub>16</sub>H<sub>12</sub>ClFN<sub>2</sub>O<sub>2</sub>S, [M+H]<sup>+</sup> 351.0365, found 351.0354.

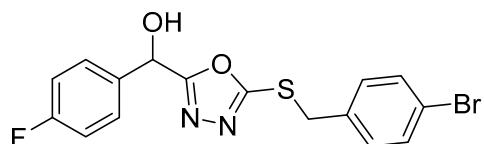

*data for E14:* A yellow solid, yield 75%, purity 98.1%, m.p. 130-131 °C.  $^1\text{H}$  NMR (400 MHz, DMSO- $d_6$ )  $\delta$  7.50-7.46 (dd,  $J$  = 12.0, 8.0 Hz, 4H, benzene H), 7.32 (d,  $J$  = 8.0 Hz, 2H, benzene H), 7.24-7.19 (m, 2H, benzene H), 6.78 (d,  $J$  = 4.0 Hz, 1H, OH), 6.00 (d,  $J$  = 4.0 Hz, 1H, CH), 4.43 (s, 2H, CH<sub>2</sub>);  $^{13}\text{C}$  NMR (101 MHz, DMSO- $d_6$ )  $\delta$  68.9, 163.9, 162.4 (d,  $J$  = 244.2 Hz), 136.7, 135.8 (d,  $J$  = 2.9 Hz), 131.7 (d,  $J$  = 24.7 Hz), 131.4, 129.1 (d,  $J$  = 8.4 Hz), 121.4, 115.7 (d,  $J$  = 21.6 Hz), 66.1, 35.5;  $^{19}\text{F}$  NMR (377 MHz, DMSO- $d_6$ )  $\delta$  -114.0; HRMS: calcd for C<sub>16</sub>H<sub>12</sub>BrFN<sub>2</sub>O<sub>2</sub>S, [M+H]<sup>+</sup> 394.9860, found 394.9851.

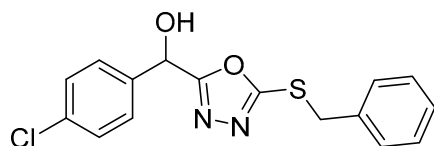

*data for E15:* A light yellow solid, yield 13%, purity 99.8%, m.p. 89-90 °C.  $^1\text{H}$  NMR (400 MHz, DMSO- $d_6$ )  $\delta$  7.46 (s, 4H, benzene H), 7.34-7.26 (m, 5H, benzene H), 6.86 (d,  $J$  = 4.0 Hz, 1H, OH), 6.00 (d,  $J$  = 4.0 Hz, 1H, CH), 4.45 (s, 2H, CH<sub>2</sub>);  $^{13}\text{C}$  NMR (125 MHz, DMSO- $d_6$ )  $\delta$  168.7, 164.1, 138.6, 136.9, 133.3, 129.4, 129.0, 128.9, 128.8, 128.2, 66.0, 36.2; HRMS: calcd for C<sub>16</sub>H<sub>13</sub>ClN<sub>2</sub>O<sub>2</sub>S, [M+H]<sup>+</sup> 345.0459, found 345.0479.

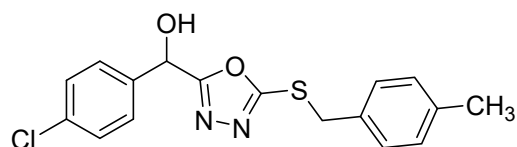

*data for E16:* A white solid, yield 59%, purity 99.1%, m.p. 165-166 °C.  $^1\text{H}$  NMR (400 MHz, DMSO- $d_6$ )  $\delta$  7.49 (dd,  $J$  = 4.0, 8.0 Hz, 2H, benzene H), 7.24-7.20 (m, 4H, benzene H), 7.07 (d,  $J$  = 8.0 Hz, 2H, benzene H), 6.78 (d,  $J$  = 4.0 Hz, 1H, OH), 6.00 (d,  $J$  = 8.0 Hz, 1H, CH), 4.41 (s, 2H, CH<sub>2</sub>), 2.25 (s, 3H, CH<sub>3</sub>);  $^{13}\text{C}$  NMR (101 MHz, DMSO- $d_6$ )  $\delta$  168.8, 164.0, 163.5, 161.2, 137.5, 135.9 (d,  $J$  = 3.0 Hz), 133.8, 129.4 (d,  $J$  = 22.4 Hz), 129.1 (d,  $J$  = 8.4 Hz), 115.7 (d,  $J$  = 21.6 Hz), 66.1, 36.1, 21.2; HRMS: calcd for C<sub>17</sub>H<sub>15</sub>ClN<sub>2</sub>O<sub>2</sub>S, [M+H]<sup>+</sup> 347.0616, found 347.0609.

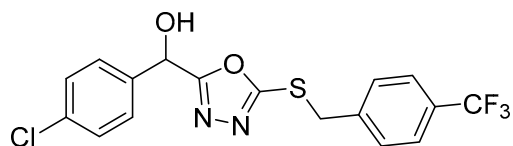

*data for E17:* A yellow solid, yield 53%, purity 98.1%, m.p. 74-75 °C.  $^1\text{H}$  NMR (400 MHz, DMSO- $d_6$ )  $\delta$  7.63 (d,  $J$  = 8.0 Hz, 2 H, benzene H), 7.47-7.42 (m, 4H, benzene H), 7.13 (d,  $J$  = 8.0 Hz, 1H, benzene H), 7.01 (d,  $J$  = 8.0 Hz, 1H, benzene H), 6.85 (d,  $J$  = 4.0 Hz, 1H, OH), 6.01 (d,  $J$  = 8.0 Hz, 1H, CH), 4.54 (s, 2H, CH<sub>2</sub>);  $^{13}\text{C}$  NMR (101 MHz, DMSO- $d_6$ )  $\delta$  170.2, 168.8, 163.9, 138.5, 130.2, 129.8, 128.9 (d,  $J$  = 10.5 Hz), 128.5, 128.0, 125.8 (q,  $J$  = 3.7 Hz), 125.2 (dd,  $J$  = 7.3, 3.6 Hz), 66.0, 35.4;  $^{19}\text{F}$  NMR (377 MHz, DMSO- $d_6$ )  $\delta$  -60.9, HRMS: calcd for C<sub>17</sub>H<sub>13</sub>ClF<sub>3</sub>N<sub>2</sub>O<sub>2</sub>S, [M+H]<sup>+</sup> 401.0333, found 401.0321.

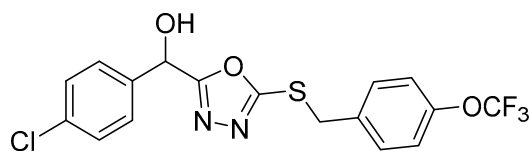

*data for E18:* A yellow solid, yield 70%, purity 97.6%, m.p. 124-125 °C.  $^1\text{H}$  NMR (400 MHz, DMSO- $d_6$ )  $\delta$  7.43 (d,  $J$  = 12.0 Hz, 4 H, benzene H), 7.22-7.19 (m, 4H, benzene H), 7.07 (d,  $J$  = 4.0 Hz, 1H, OH), 6.01 (d,  $J$  = 4.0 Hz, 1H, CH), 4.01 (s, 2H, CH<sub>2</sub>);  $^{13}\text{C}$  NMR (101 MHz, DMSO- $d_6$ )  $\delta$  170.3, 168.7, 164.0, 147.8, 140.4, 137.7, 130.8, 128.6, 128.0, 120.9, 72.5, 59.4;  $^{19}\text{F}$  NMR (377 MHz, DMSO- $d_6$ )  $\delta$  -56.8, HRMS: calcd for C<sub>17</sub>H<sub>12</sub>ClF<sub>3</sub>N<sub>2</sub>O<sub>3</sub>S, [M+H]<sup>+</sup> 417.0282, found 417.0280.

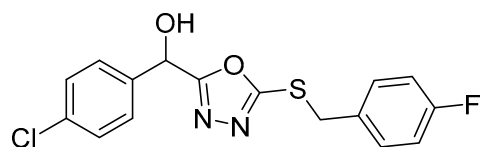

*data for E19:* A yellow solid, yield 75%, purity 99.6%, m.p. 74-75 °C.  $^1\text{H}$  NMR (400 MHz, DMSO- $d_6$ )  $\delta$  7.51-7.46 (m, 2H, benzene H), 7.43-7.38 (m, 2H, benzene H), 7.25-7.20 (m, 2H, benzene H), 7.13-7.07 (s, 2H, benzene H), 6.80 (d,  $J$  = 4.0 Hz, 1H, OH), 6.01 (d,  $J$  = 4.0 Hz, 1H, CH), 4.45 (s, 2H, CH<sub>2</sub>);  $^{13}\text{C}$  NMR (101 MHz, DMSO- $d_6$ )  $\delta$  168.9, 164.0, 163.4 (d,  $J$  = 33.3 Hz), 161.0 (d,  $J$  = 33.4 Hz), 135.8 (d,  $J$  = 3.0 Hz), 133.3 (d,  $J$  = 3.1 Hz), 131.5 (d,  $J$  = 8.4 Hz), 129.1 (d,  $J$  = 8.4 Hz), 115.9 (d,  $J$  = 4.0 Hz), 115.7 (d,  $J$  = 4.0 Hz), 66.1, 35.4;  $^{19}\text{F}$  NMR (377 MHz, DMSO- $d_6$ )  $\delta$  -114.4; HRMS: calcd for C<sub>16</sub>H<sub>12</sub>ClFN<sub>2</sub>O<sub>2</sub>S, [M+H]<sup>+</sup> 351.0365, found 351.0357.

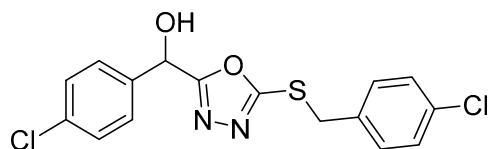

*data for E<sub>20</sub>*: A white solid, yield 65%, purity 98.2%, m.p. 82-83 °C. <sup>1</sup>H NMR (400 MHz, DMSO-*d*<sub>6</sub>) δ 7.50-7.45 (m, 2H, benzene H), 7.40-7.32 (m, 4H, benzene H), 7.25-7.19 (m, 2H, benzene H), 6.78 (d, *J* = 8.0 Hz, 1H, OH), 6.00 (d, *J* = 4.0 Hz, 1H, CH), 4.45 (s, 2H, CH<sub>2</sub>); <sup>13</sup>C NMR (101 MHz, DMSO-*d*<sub>6</sub>) δ 168.9, 163.9, 162.4 (d, *J* = 244.2 Hz), 136.2, 135.8 (d, *J* = 3.0 Hz), 132.8, 131.3, 129.1 (d, *J* = 8.4 Hz), 128.9, 115.7 (d, *J* = 21.6 Hz), 66.1, 35.4; HRMS: calcd for C<sub>16</sub>H<sub>12</sub>Cl<sub>2</sub>N<sub>2</sub>O<sub>2</sub>S, [M+H]<sup>+</sup> 367.0069, found 367.0064.

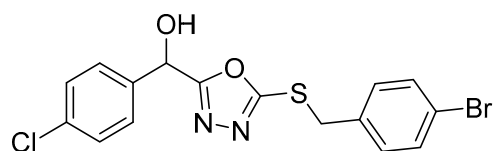

*data for E<sub>21</sub>*: A white solid, yield 65%, purity 99.7%, m.p. 81-82 °C. <sup>1</sup>H NMR (400 MHz, DMSO-*d*<sub>6</sub>) δ 7.45 (s, 4H, benzene H), 7.29-7.26 (m, 4H, benzene H), 6.98 (s, 1H, OH), 6.00 (s, 1H, CH), 4.42 (s, 2H, CH<sub>2</sub>); <sup>13</sup>C NMR (101 MHz, DMSO-*d*<sub>6</sub>) δ 170.1, 168.7, 163.9, 133.3, 132.3, 131.7 (d, *J* = 23.8 Hz), 131.3 (d, *J* = 9.2 Hz), 128.9 (d, *J* = 12.0 Hz), 128.3 (d, *J* = 53.7 Hz), 66.0, 35.4; HRMS: calcd for C<sub>16</sub>H<sub>12</sub>BrClN<sub>2</sub>O<sub>2</sub>S, [M+H]<sup>+</sup> 410.9564, found 410.9561.

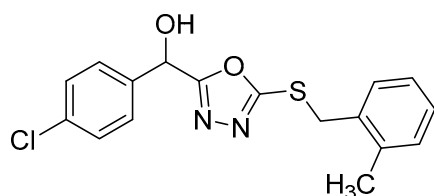

*data for E<sub>22</sub>*: A yellow liquid, yield 47%, purity 98.5%. <sup>1</sup>H NMR (400 MHz, DMSO) δ 7.49-7.44 (m, 4H, phenyl H), 7.21 (d, *J* = 8.0 Hz, 1H, phenyl H), 7.18 (d, *J* = 4.0 Hz, 2H, phenyl H), 7.08-7.03 (m, 1H, phenyl H), 6.86 (d, *J* = 4.0 Hz, 1H, CHOH), 6.03 (d, *J* = 4.0 Hz, 1H, CHOH), 4.47 (s, 2H, SCH<sub>2</sub>), 2.33 (s, 3H, CH<sub>3</sub>); <sup>13</sup>C NMR (101 MHz, DMSO) δ 168.30, 163.51, 138.13, 136.80, 133.71, 132.87, 130.51, 129.91, 128.51, 128.40, 128.24, 126.08, 65.60, 34.38, 18.75. HRMS: calcd for C<sub>17</sub>H<sub>15</sub>ClN<sub>2</sub>O<sub>2</sub>S [M+H]<sup>+</sup> 347.06155, found 347.06152.

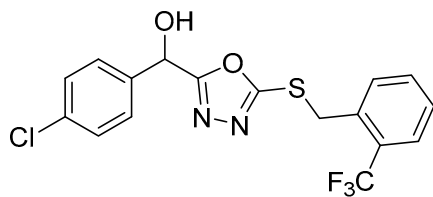

*data for E<sub>23</sub>*: A yellow liquid, yield 47%, purity 97.5%. <sup>1</sup>H NMR (400 MHz, DMSO)  $\delta$  7.51-7.49 (m, 1H, phenyl H), 7.46 (s, 4H, phenyl H), 7.44-7.42 (m, 1H, phenyl H), 7.37-7.34 (m, 1H, phenyl H), 7.31-7.27 (m, 1H, phenyl H), 6.85 (d,  $J$  = 4.0 Hz, 1H, CHOH), 6.01 (d,  $J$  = 4.0 Hz, 1H, CHOH), 4.51 (s, 2H, SCH<sub>2</sub>). <sup>13</sup>C NMR (101 MHz, DMSO)  $\delta$  168.49, 163.17, 146.78, 138.08, 132.86, 131.65, 130.17, 128.52, 128.44 (d,  $J$  = 4.0 Hz), 127.42, 121.39, 120.24, 118.83, 65.59, 30.62. <sup>19</sup>F NMR (376 MHz, DMSO)  $\delta$  -55.94 (d,  $J$  = 3.8 Hz). HRMS: calcd for C<sub>17</sub>H<sub>12</sub>ClF<sub>3</sub>N<sub>2</sub>O<sub>3</sub>S [M+H]<sup>+</sup> 417.02820, found 417.02808.

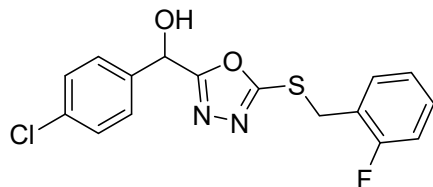

*data for E<sub>24</sub>*: A white solid, yield 46%, purity 99.3%. <sup>1</sup>H NMR (400 MHz, DMSO)  $\delta$  7.49-7.44 (m, 4H, phenyl H), 7.39-7.31 (m, 2H, phenyl H), 7.20-7.15 (m, 1H, phenyl H), 7.11-7.07 (m, 1H, phenyl H), 6.86 (d,  $J$  = 4.0 Hz, 1H, CHOH), 6.02 (d,  $J$  = 4.0 Hz, 1H, CHOH), 4.48 (s, 2H, SCH<sub>2</sub>). <sup>13</sup>C NMR (101 MHz, DMSO)  $\delta$  168.45, 163.22, 161.58, 159.13, 138.07, 132.86, 131.30 (d,  $J$  = 3.0 Hz), 130.26 (d,  $J$  = 8.1 Hz), 128.44 (d,  $J$  = 9.1 Hz), 124.50 (d,  $J$  = 4.0 Hz), 123.38 (d,  $J$  = 14.1 Hz), 115.53 (d,  $J$  = 21.2 Hz), 65.60, 29.72 (d,  $J$  = 3.0 Hz). <sup>19</sup>F NMR (376 MHz, DMSO)  $\delta$  -116.67- -116.74 (m). HRMS: calcd for C<sub>16</sub>H<sub>12</sub>ClFN<sub>2</sub>O<sub>2</sub>S [M+H]<sup>+</sup> 351.03648, found 351.03647.

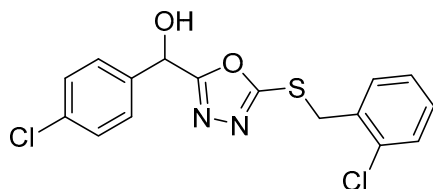

*data for E<sub>25</sub>*: A yellow solid, yield 48%, purity 99.5%, m.p. 54-56 °C. <sup>1</sup>H NMR (400 MHz, DMSO)  $\delta$  7.49-7.42 (m, 6H, phenyl H), 7.34-7.30 (m, 1H, phenyl H), 7.25-7.21 (m, 1H, phenyl H), 6.87 (d,  $J$  = 4.0 Hz, 1H, CHOH), 6.03 (d,  $J$  = 4.0 Hz, 1H, CHOH), 4.53 (s, 2H, SCH<sub>2</sub>). <sup>13</sup>C NMR (101 MHz,

DMSO)  $\delta$  168.50, 163.21, 138.09, 133.71, 133.32, 132.89, 131.44, 130.01, 129.66, 128.50, 128.41, 127.41, 65.61, 34.20. HRMS: calcd for  $C_{16}H_{12}Cl_2N_2O_2S$   $[M+H]^+$  367.00693, found 367.00690.

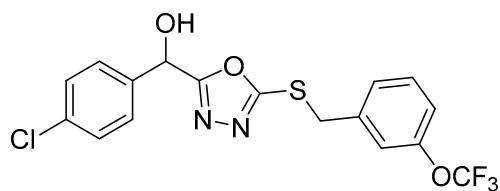

*data for E<sub>26</sub>*: A yellow liquid, yield 39%, purity 99.6%.  $^1H$  NMR (400 MHz, DMSO)  $\delta$  7.47-7.42 (m, 4H, phenyl H), 7.40-7.37 (m, 3H, phenyl H), 7.26 (d,  $J$  = 8.0 Hz, 1H, phenyl H), 6.85 (d,  $J$  = 4.0 Hz, 1H, CHOH), 6.01 (d,  $J$  = 4.0 Hz, 1H, CHOH), 4.51 (s, 2H, SCH<sub>2</sub>).  $^{13}C$  NMR (101 MHz, DMSO)  $\delta$  168.34, 163.51, 148.27 (q,  $J$  = 2.0 Hz), 139.58, 138.09, 132.87, 130.46, 128.47, 128.37, 128.09, 121.46, 120.24, 118.77, 65.58, 34.94.  $^{19}F$  NMR (376 MHz, DMSO)  $\delta$  -56.78 (s). HRMS: calcd for  $C_{17}H_{12}ClF_3N_2O_3S$   $[M+H]^+$  417.02820, found 417.02814.

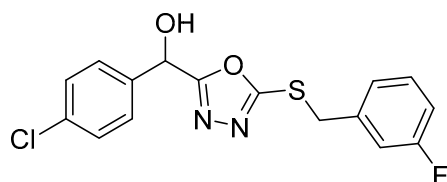

*data for E<sub>27</sub>*: A yellow liquid, yield 49%, purity 98.7%.  $^1H$  NMR (400 MHz, DMSO)  $\delta$  7.48-7.43 (m, 4H, phenyl H), 7.34-7.29 (m, 1H, phenyl H), 7.24-7.17 (m, 2H, phenyl H), 7.12-7.09 (m, 1H, phenyl H), 6.85 (d,  $J$  = 4.0 Hz, 1H, CHOH), 6.02 (d,  $J$  = 4.0 Hz, 1H, CHOH), 4.47 (s, 2H, SCH<sub>2</sub>).  $^{13}C$  NMR (101 MHz, DMSO)  $\delta$  168.32, 163.53, 163.16, 160.73, 139.47 (d,  $J$  = 8.1 Hz), 138.08, 132.86, 130.47 (d,  $J$  = 8.1 Hz), 128.42 (d,  $J$  = 11.1 Hz), 125.09 (d,  $J$  = 2.0 Hz), 115.77 (d,  $J$  = 22.2 Hz), 114.63 (d,  $J$  = 21.2 Hz), 65.57, 35.10 (d,  $J$  = 1.0 Hz).  $^{19}F$  NMR (376 MHz, DMSO)  $\delta$  -112.87 - -112.99 (m). HRMS: calcd for  $C_{16}H_{12}FN_2O_2S$   $[M+H]^+$  351.03648, found 351.03647.

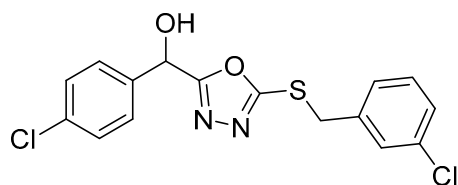

*data for E<sub>28</sub>*: A yellow liquid, yield 47%, purity 99.6%.  $^1H$  NMR (400 MHz, DMSO)  $\delta$  7.48-7.43 (m, 5H, phenyl H), 7.34-7.29 (m, 3H, phenyl H), 6.86 (d,  $J$  = 4.0 Hz, 1H, CHOH), 6.01 (d,  $J$  = 4.0 Hz, 1H, CHOH), 4.46 (s, 2H, SCH<sub>2</sub>).  $^{13}C$  NMR (101 MHz, DMSO)  $\delta$  168.33, 163.52, 139.25, 138.07,

133.01, 132.87, 130.34, 128.83, 128.49, 128.37, 127.72, 127.66, 65.58, 34.98. HRMS: calcd for  $\text{C}_{16}\text{H}_{12}\text{Cl}_2\text{N}_2\text{O}_2\text{S}$   $[\text{M}+\text{H}]^+$  367.00693, found 367.00693.

## 2. Copies of $^1\text{H}$ , $^{13}\text{C}$ NMR, $^{19}\text{F}$ NMR, HRMS and HPLC of the title compounds

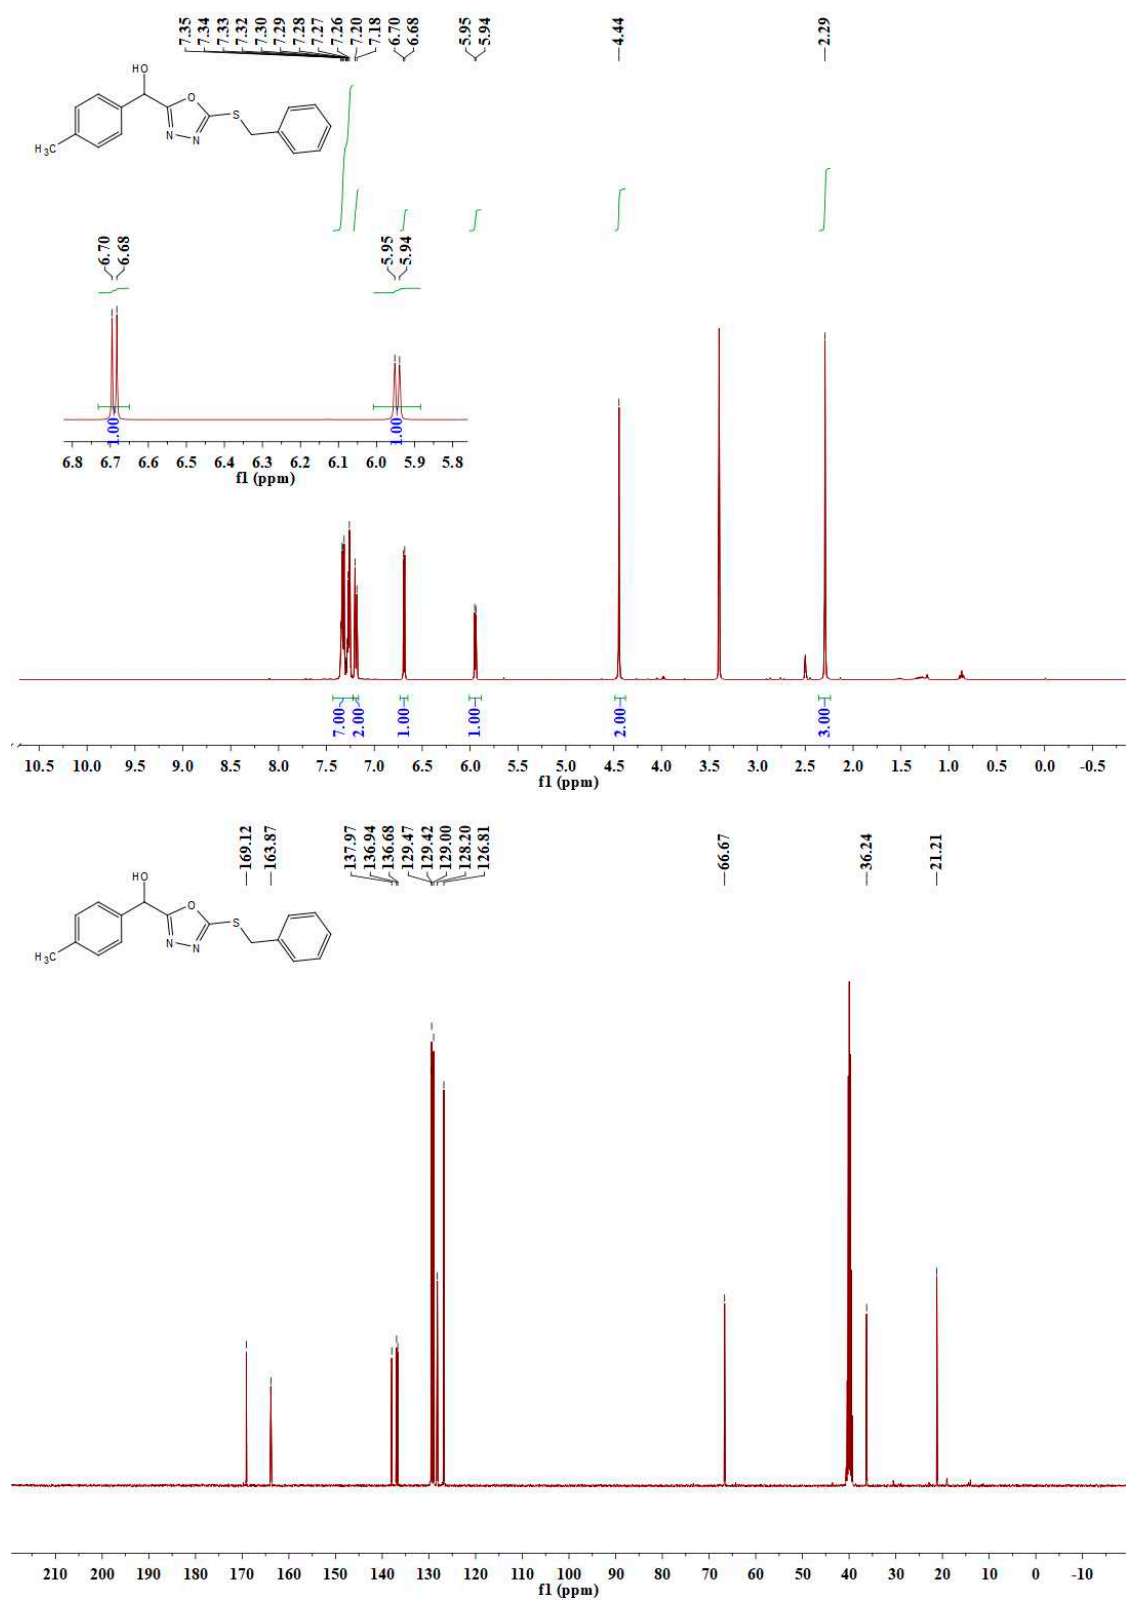



2018121406 #79 RT: 0.81 AV: 1 NL: 4.91E5  
T: FTMS+pESFull.ms [100.0000-1000.0000]

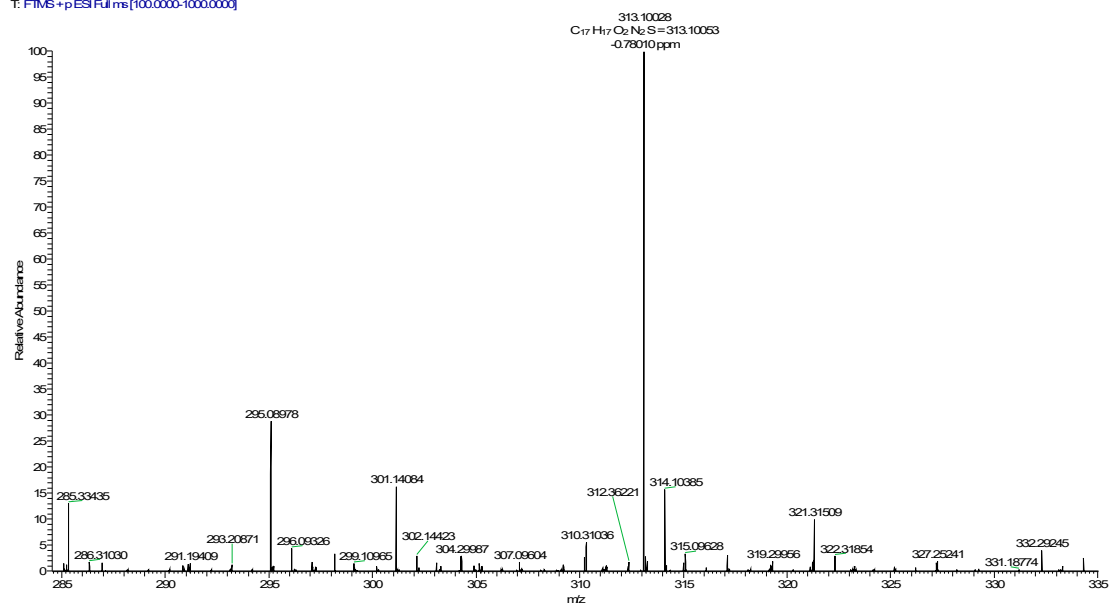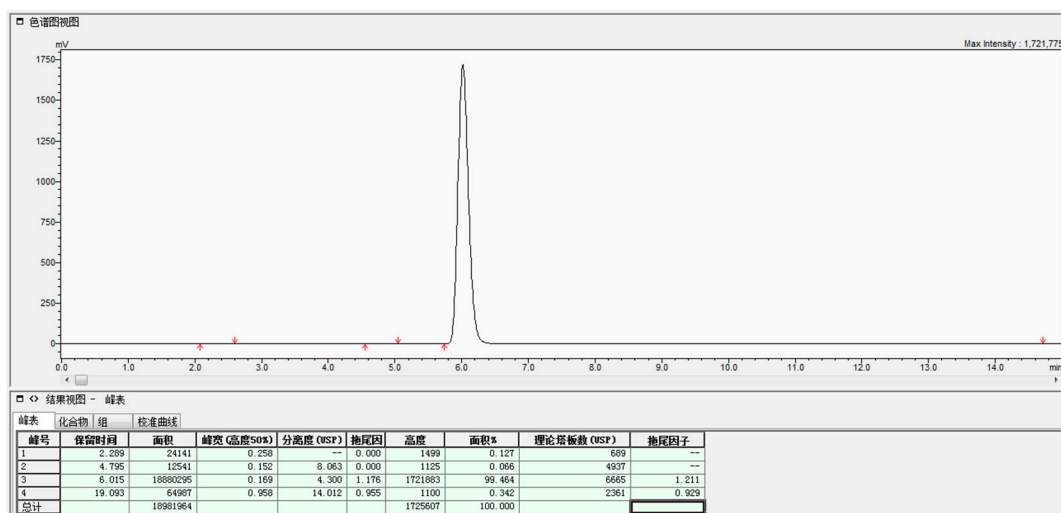

Figure S1.  $^1\text{H}$  NMR,  $^{13}\text{C}$  NMR, HRMS, and HPLC for **E<sub>1</sub>**.

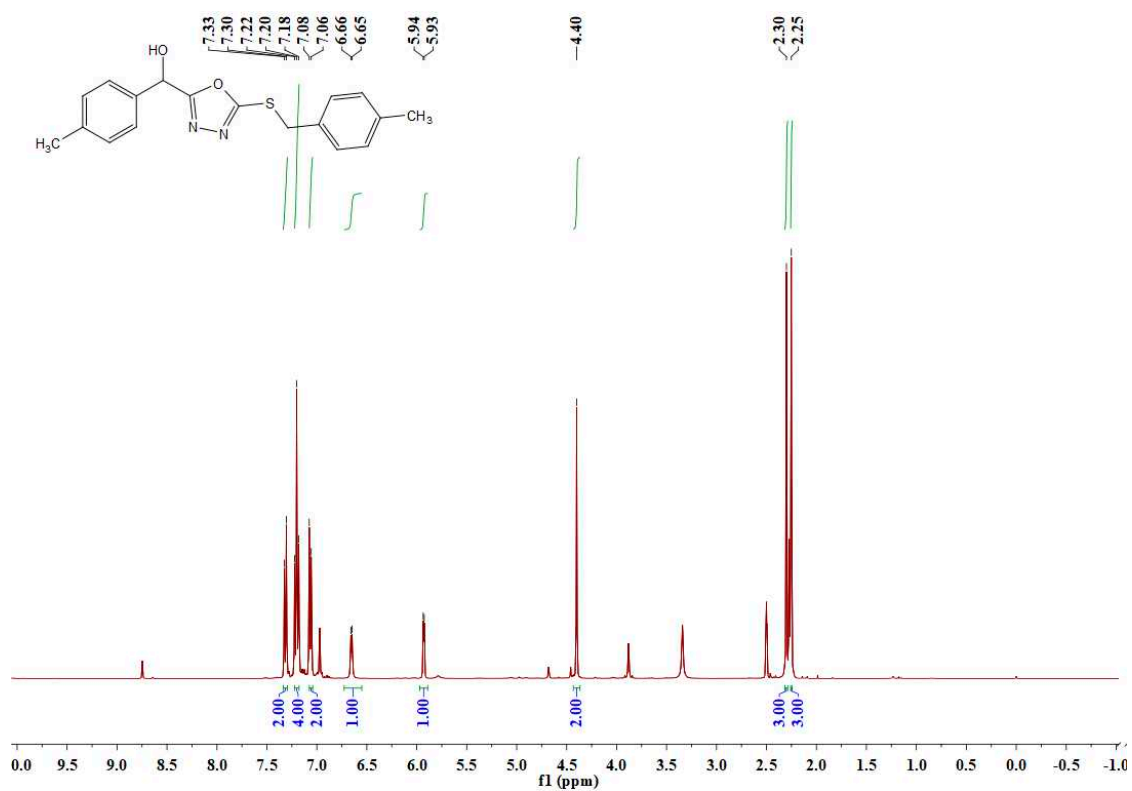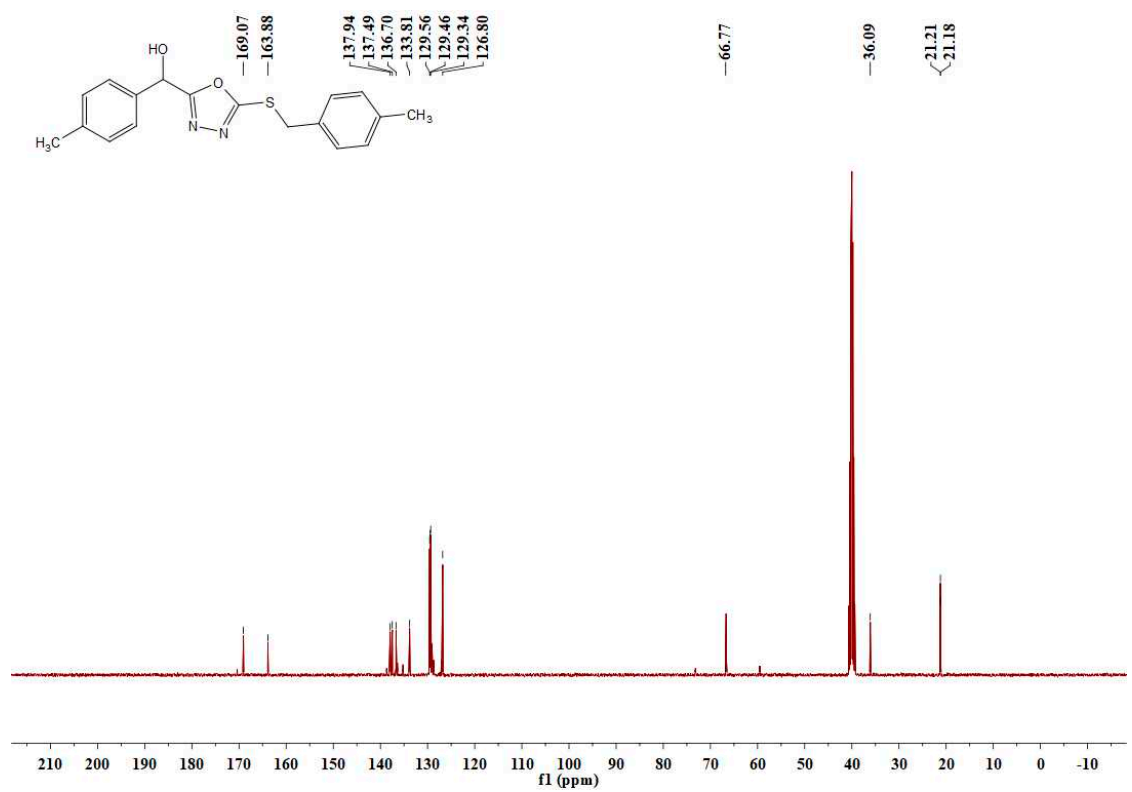

20181205121#85 RT: 0.85 AV: 1 NL: 6.49E6  
T: FTMS+pESI Full ms [100.0000-1000.0000]

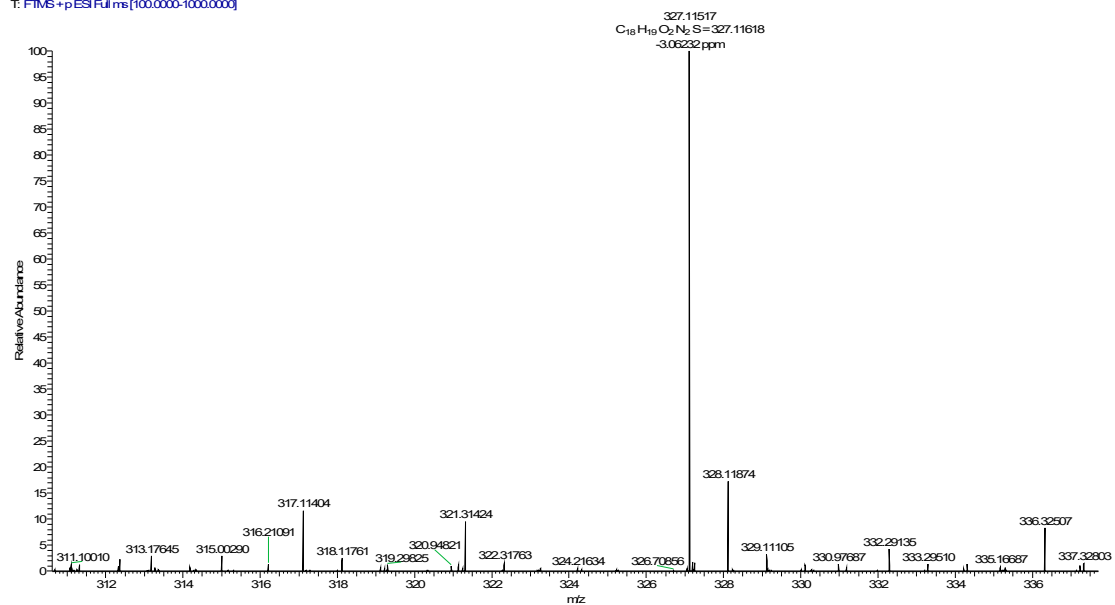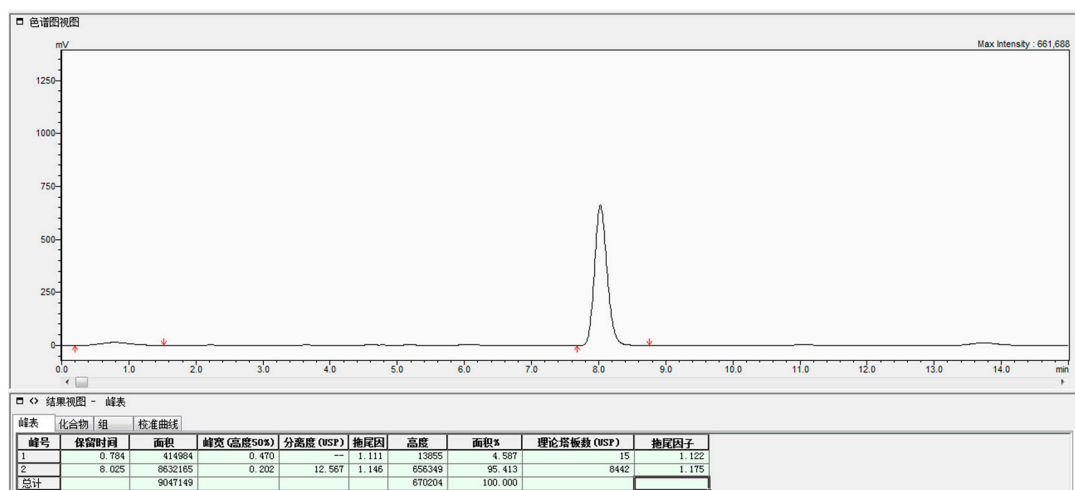

Figure S2.  $^1\text{H}$  NMR,  $^{13}\text{C}$  NMR,  $^{19}\text{F}$  NMR, HRMS and HPLC for E2.

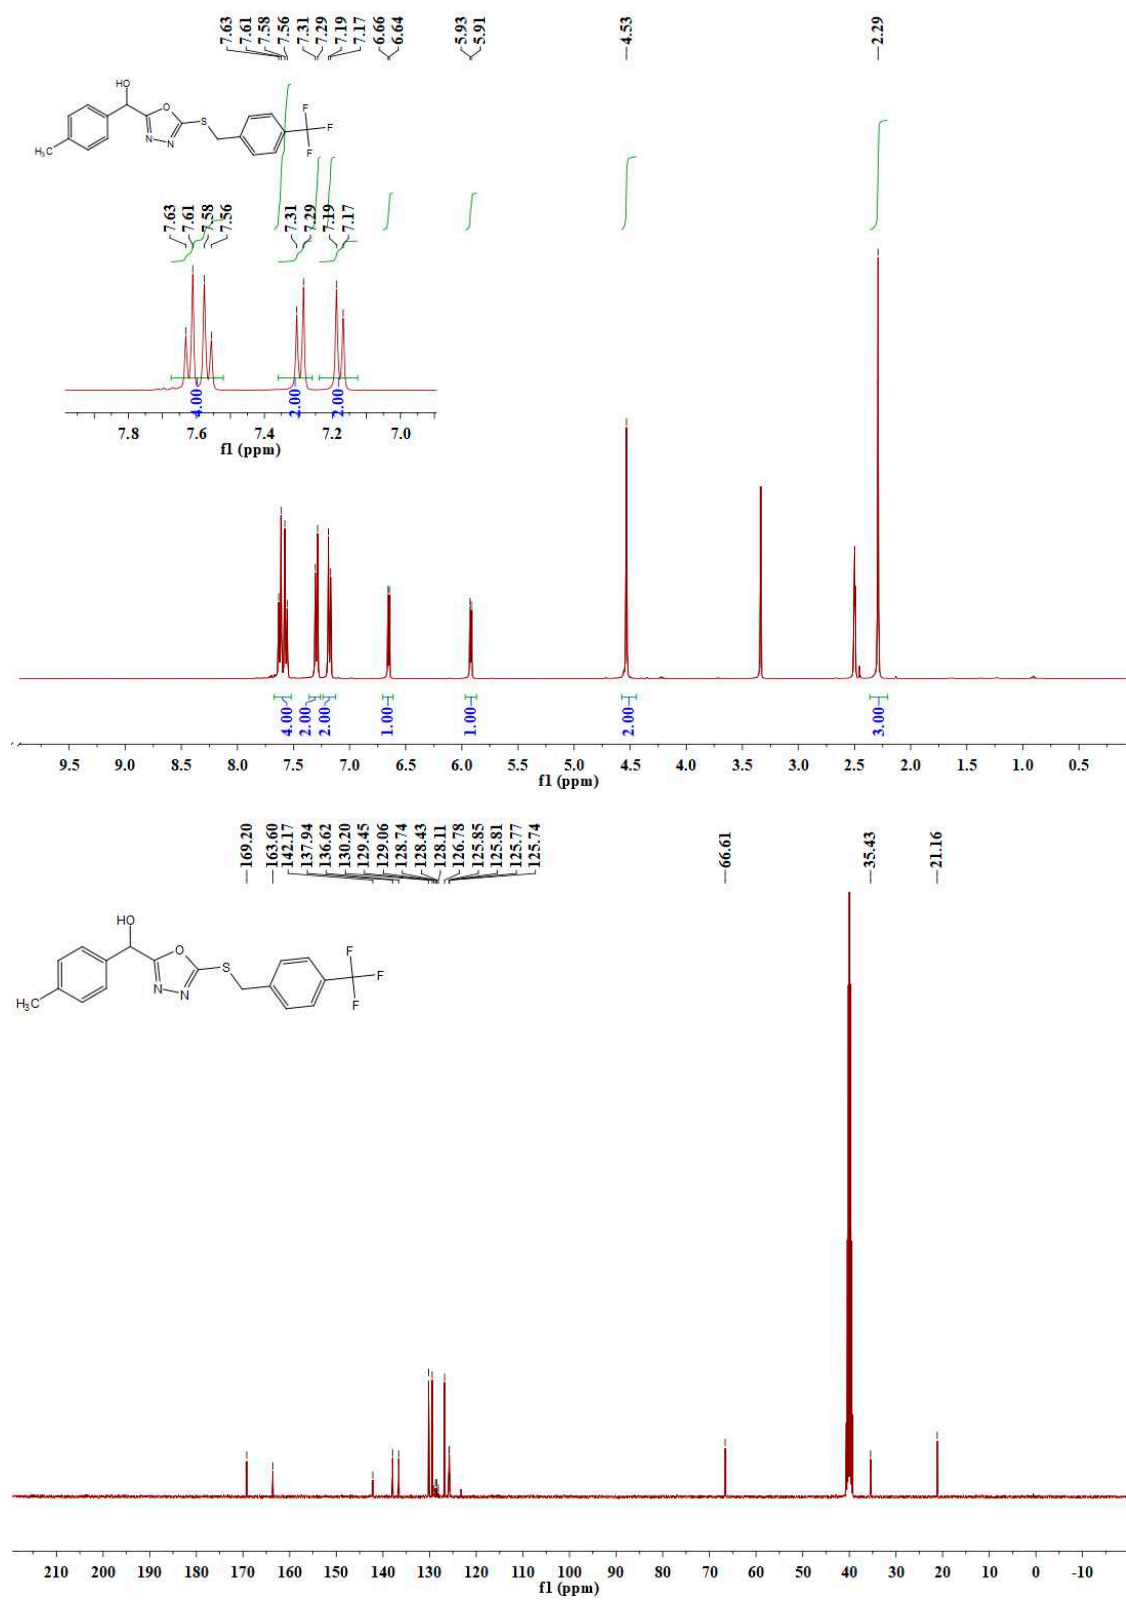

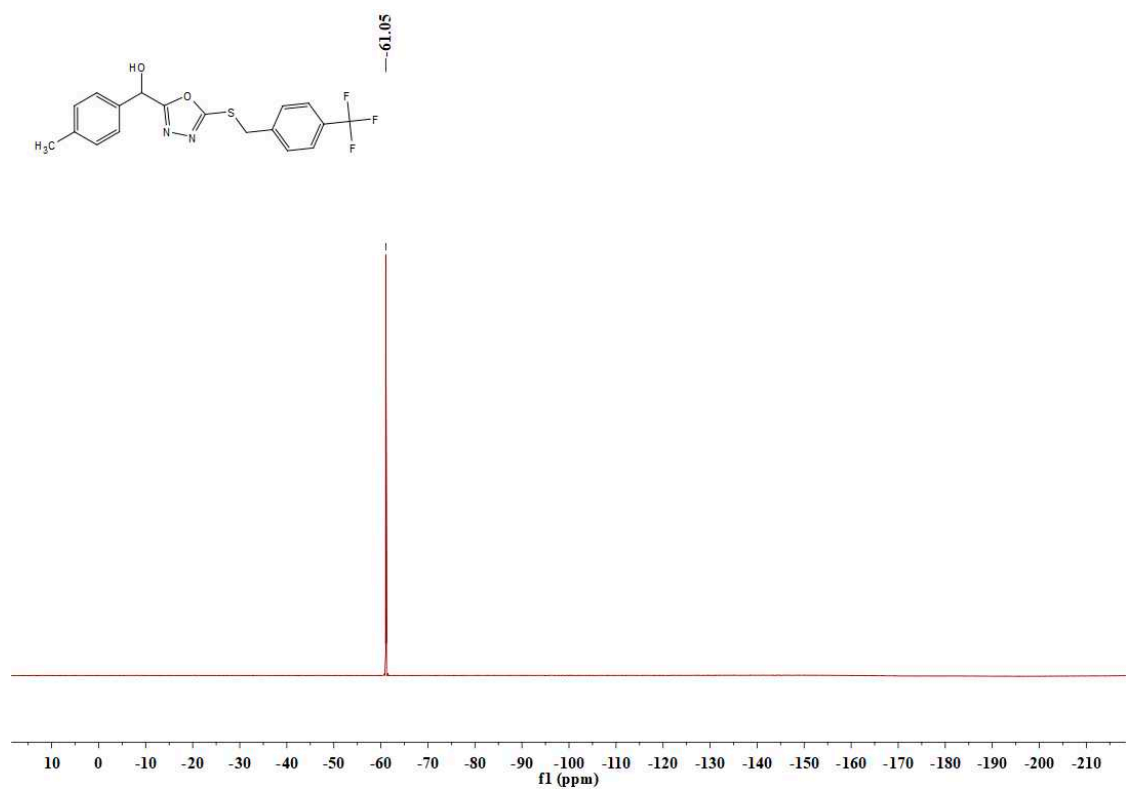

20181205116#79 RT: 0.78 AV: 1 NL: 3.00E7  
T: FTMS+pESI Full ms [100.0000-1000.0000]

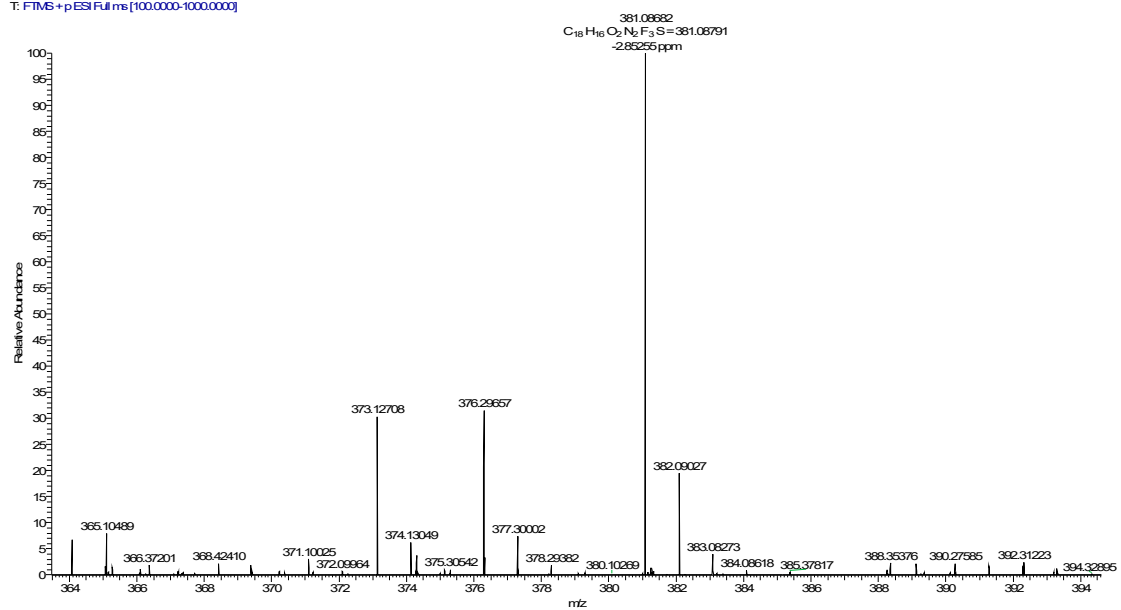

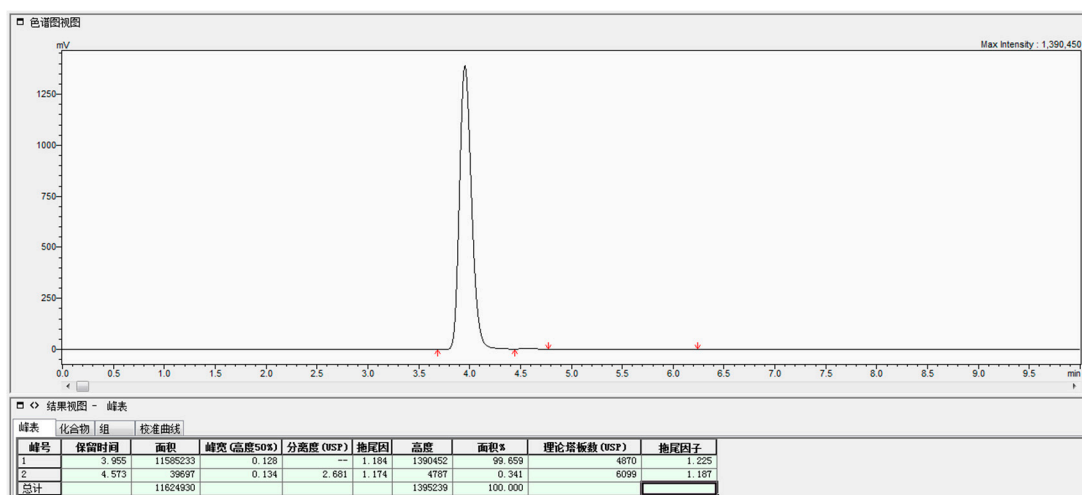

Figure S3.  $^1\text{H}$  NMR,  $^{13}\text{C}$  NMR,  $^{19}\text{F}$  NMR, HRMS and HPLC for of **E3**.

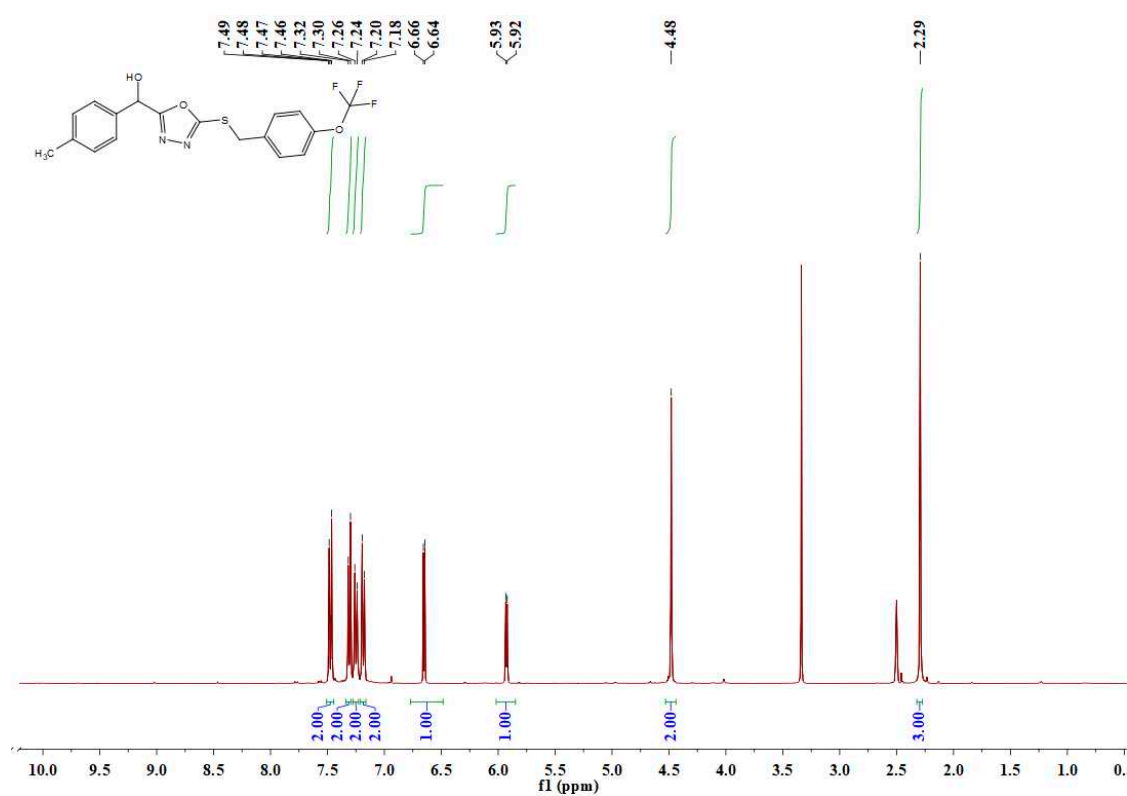

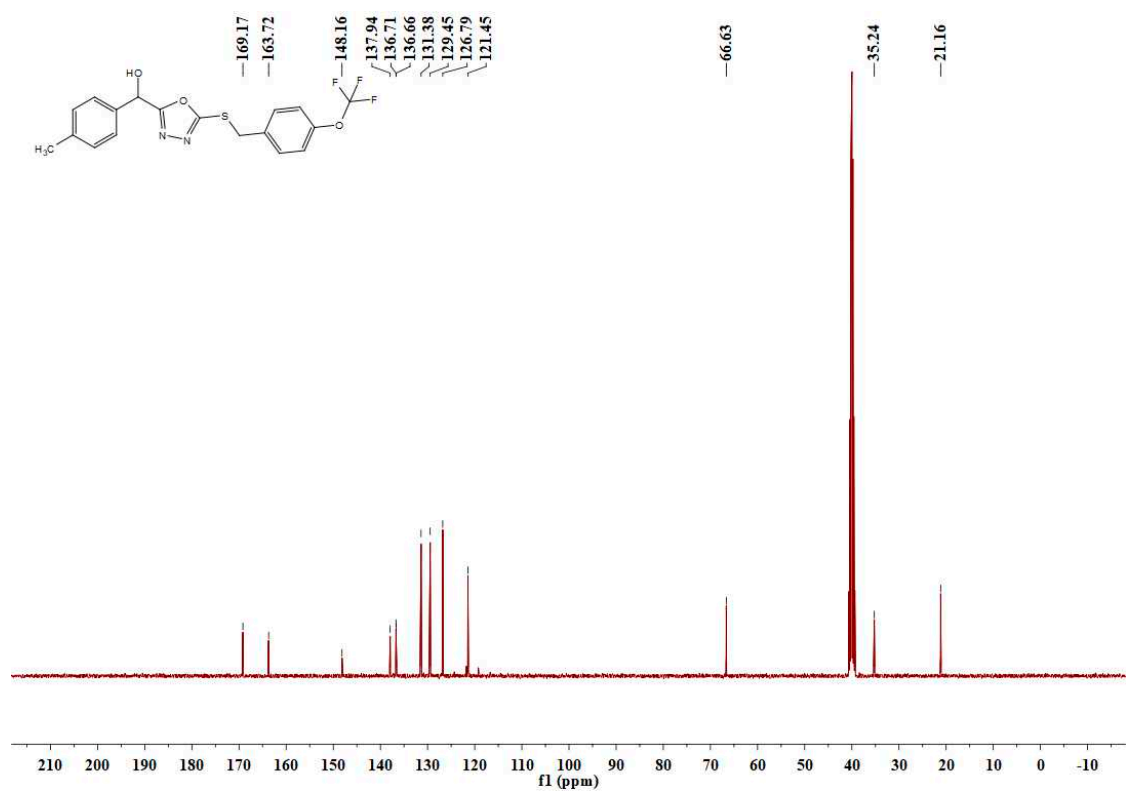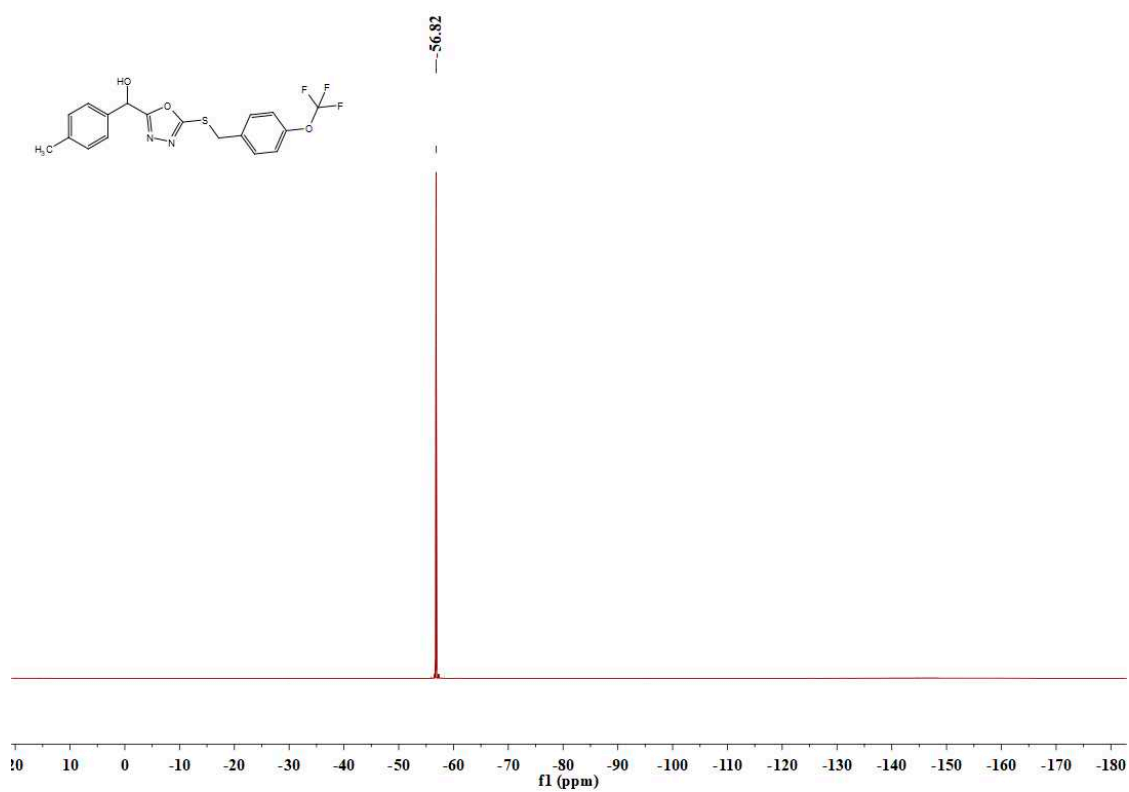

20181205118#77 RT: 0.75 AV: 1 NL: 3.96E7  
T: FTMS+pESI Full ms [100.0000-1000.0000]

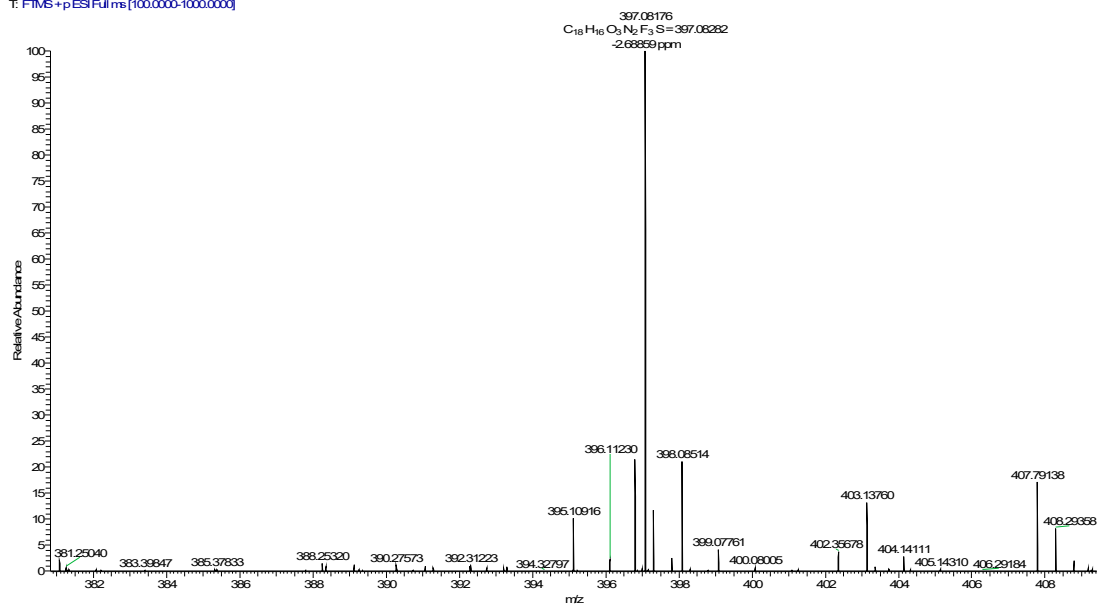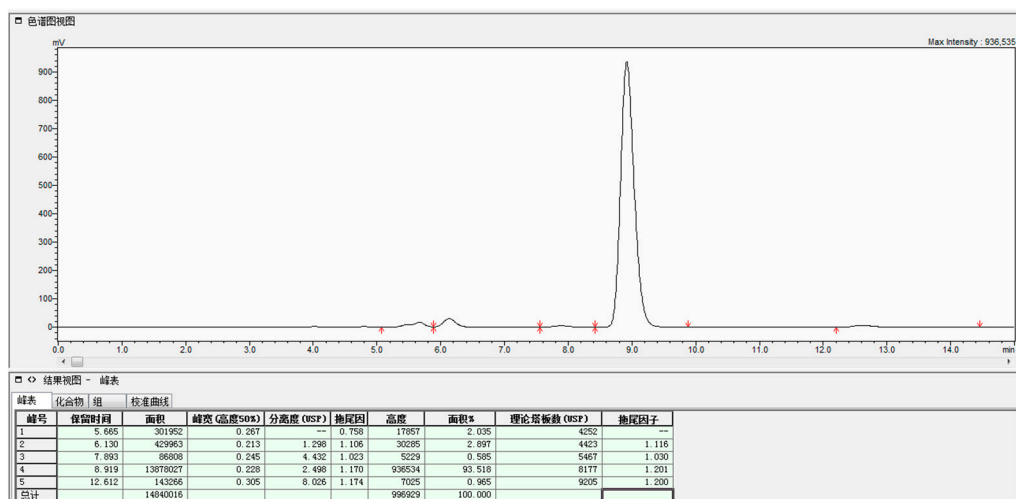

Figure S4.  $^1\text{H}$  NMR,  $^{13}\text{C}$  NMR,  $^{19}\text{F}$  NMR, HRMS and HPLC for of E4.



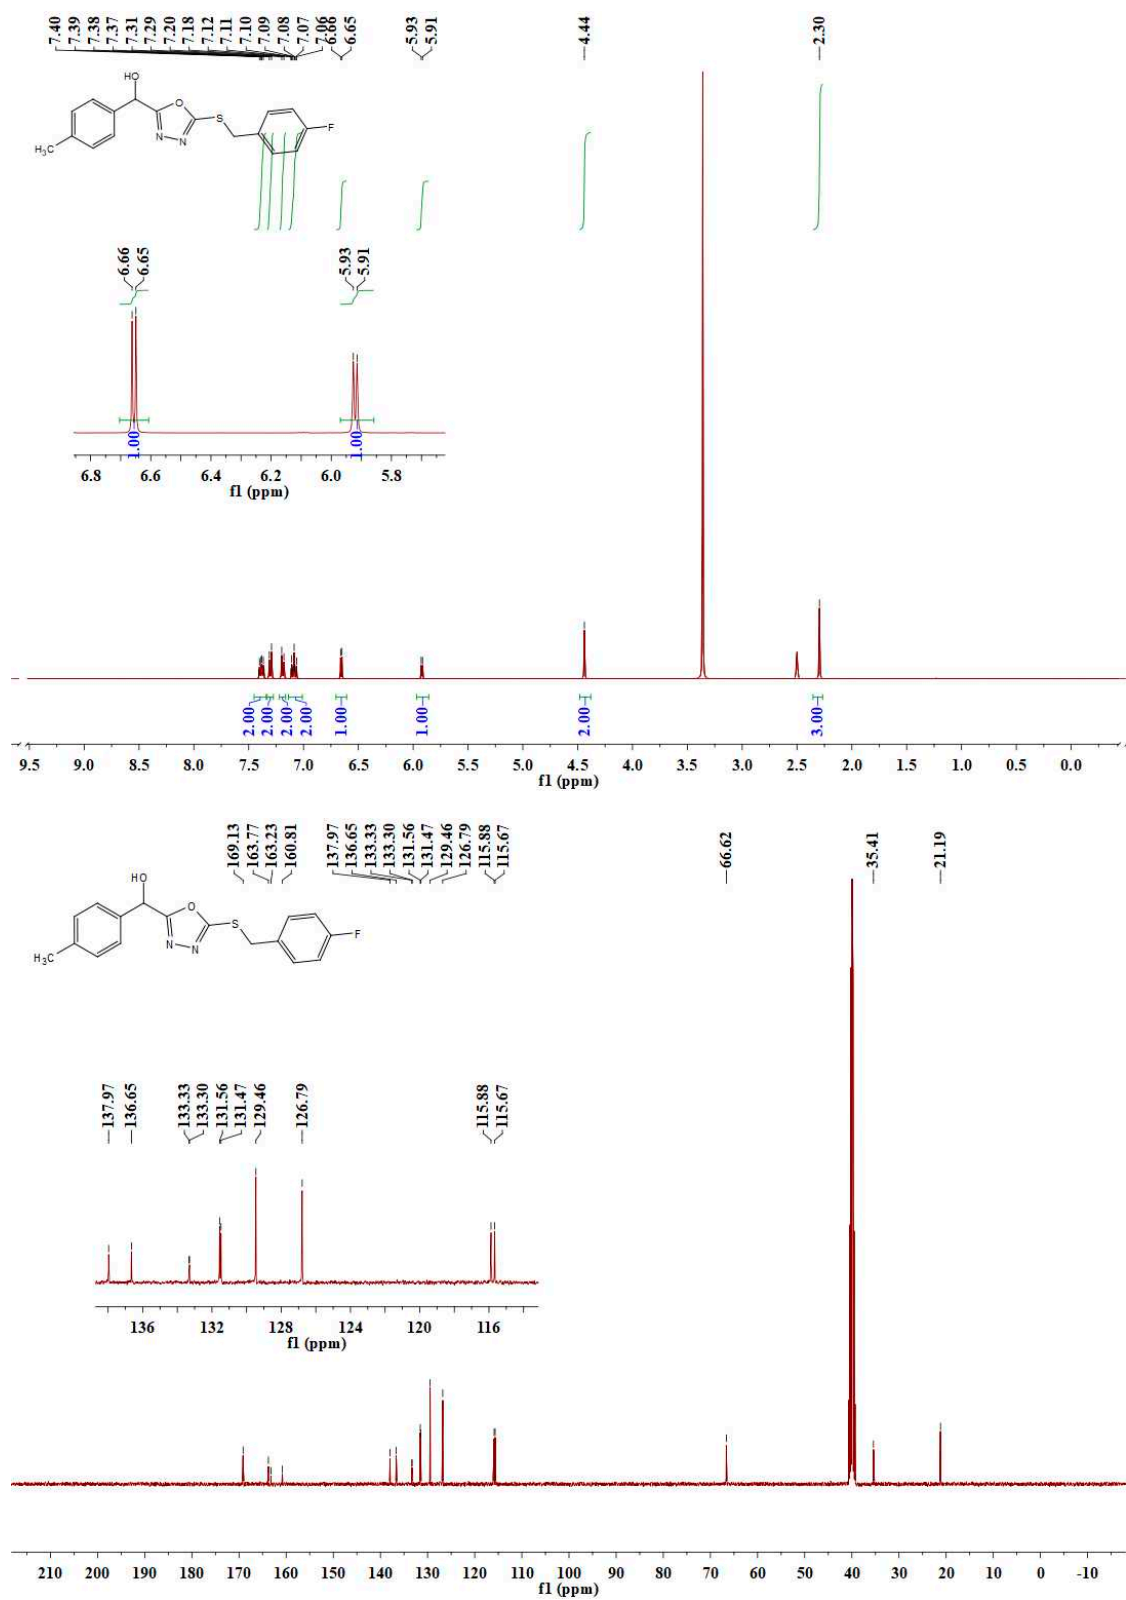

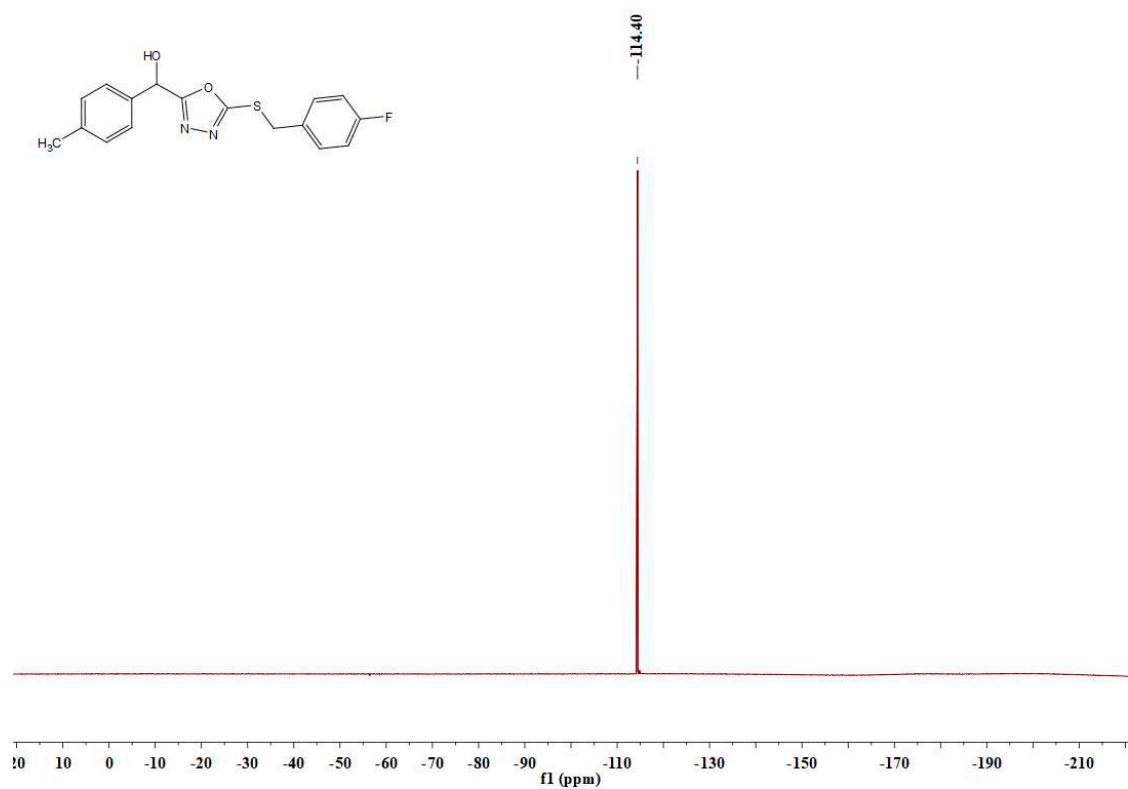

20181205117 #69 RT: 0.69 AV: 1 NL: 2.4256  
T: FIMS+pESI Full ms [100.0000-1000.0000]

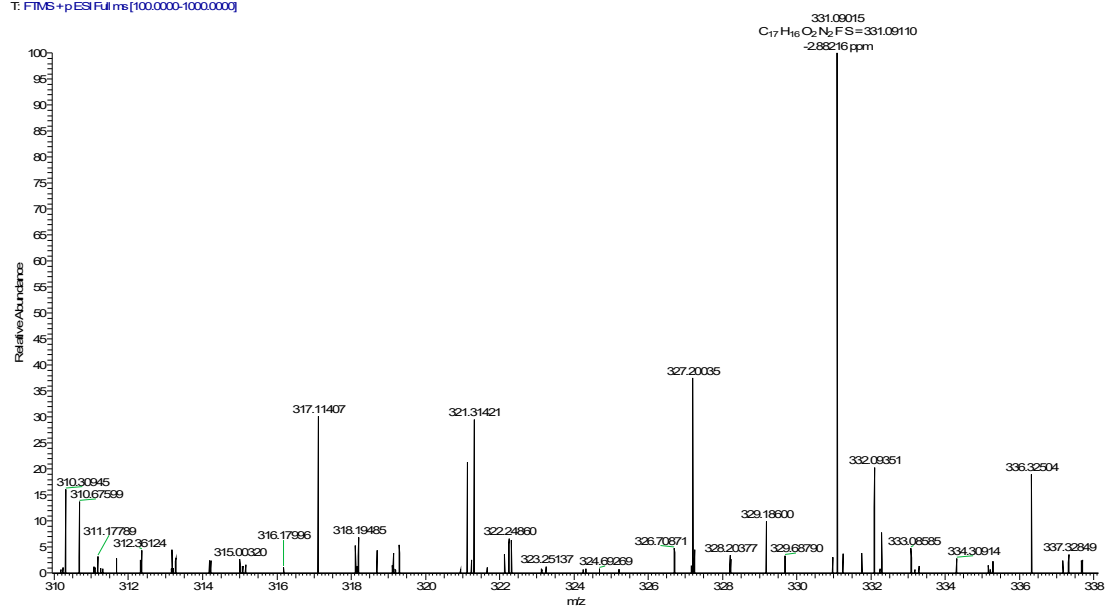

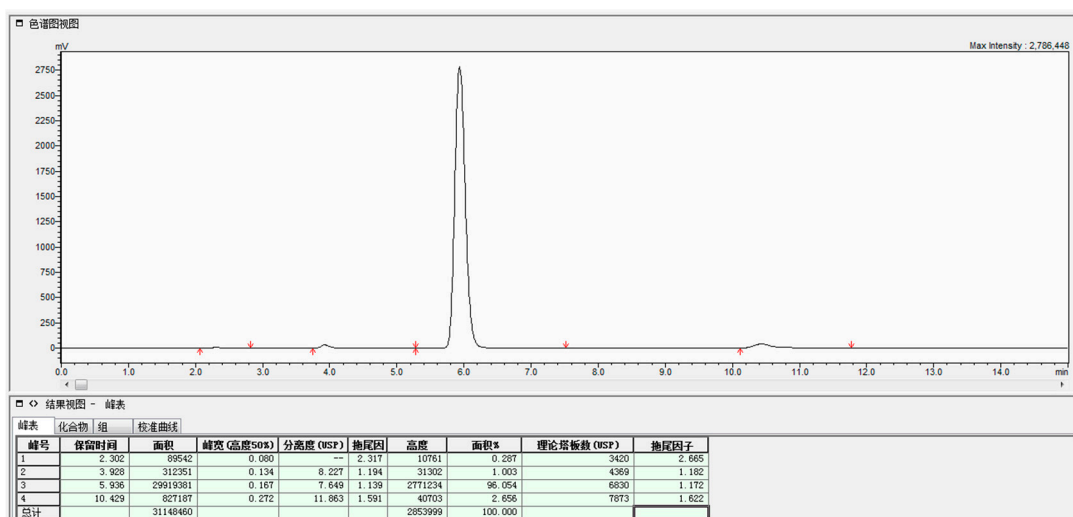

Figure S5.  $^1\text{H}$  NMR,  $^{13}\text{C}$  NMR,  $^{19}\text{F}$  NMR, HRMS and HPLC for **E5**.

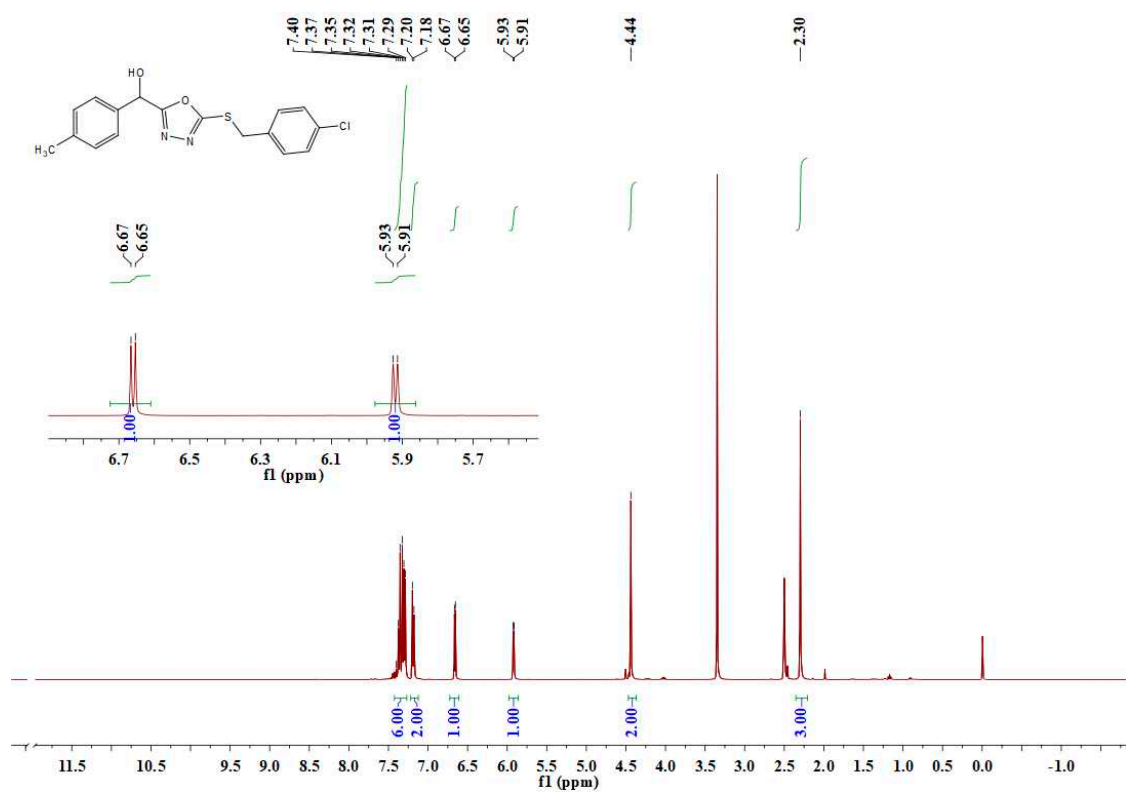

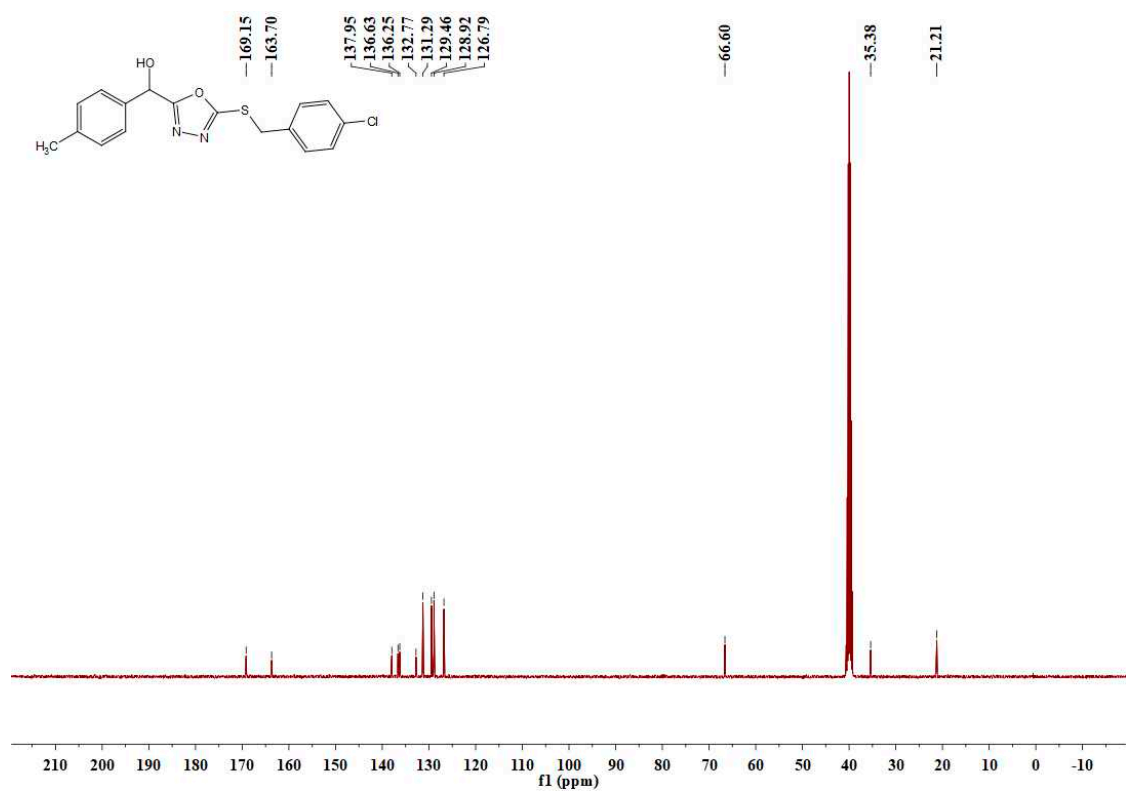

20181205119 #89 RT: 0.89 AV: 1 NL: 2.82E6  
T: FTMS+pESI Full ms [100.0000-1000.0000]

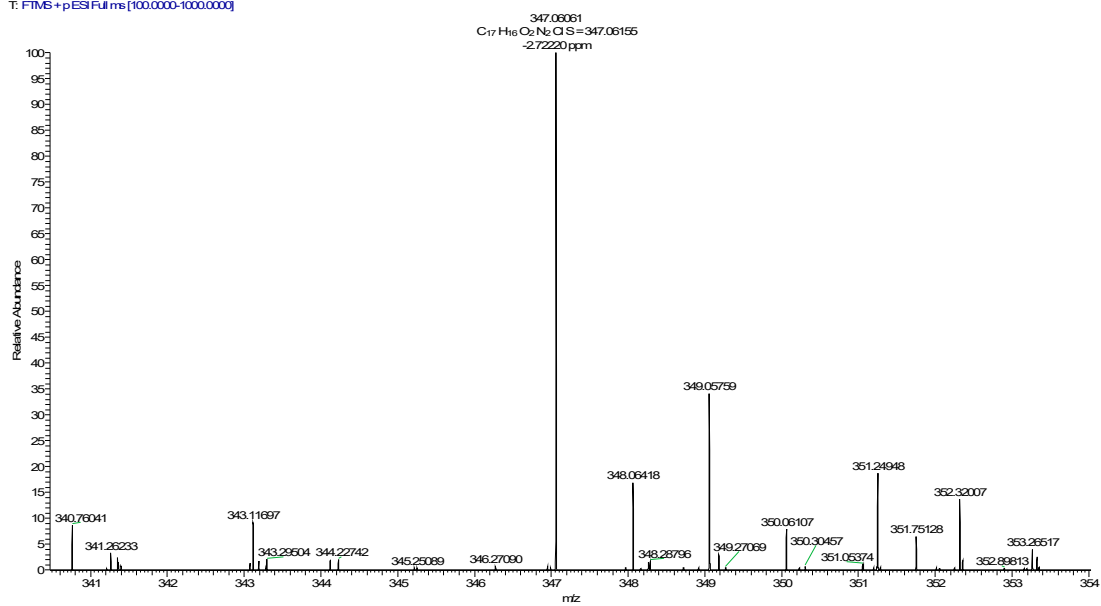

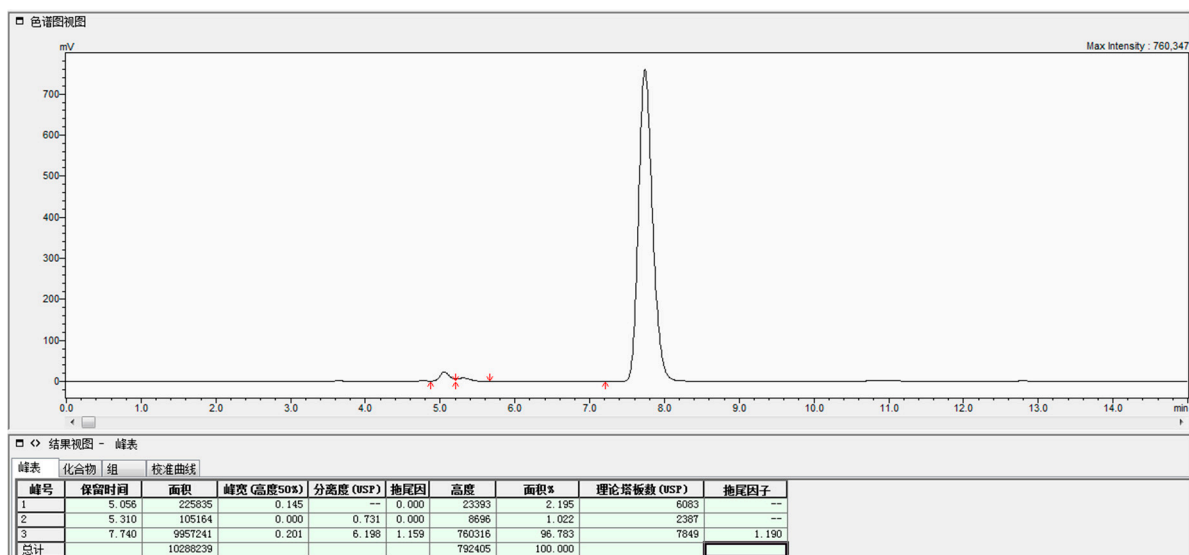

Figure S6.  $^1\text{H}$  NMR,  $^{13}\text{C}$  NMR, HRMS, and HPLC for E6.

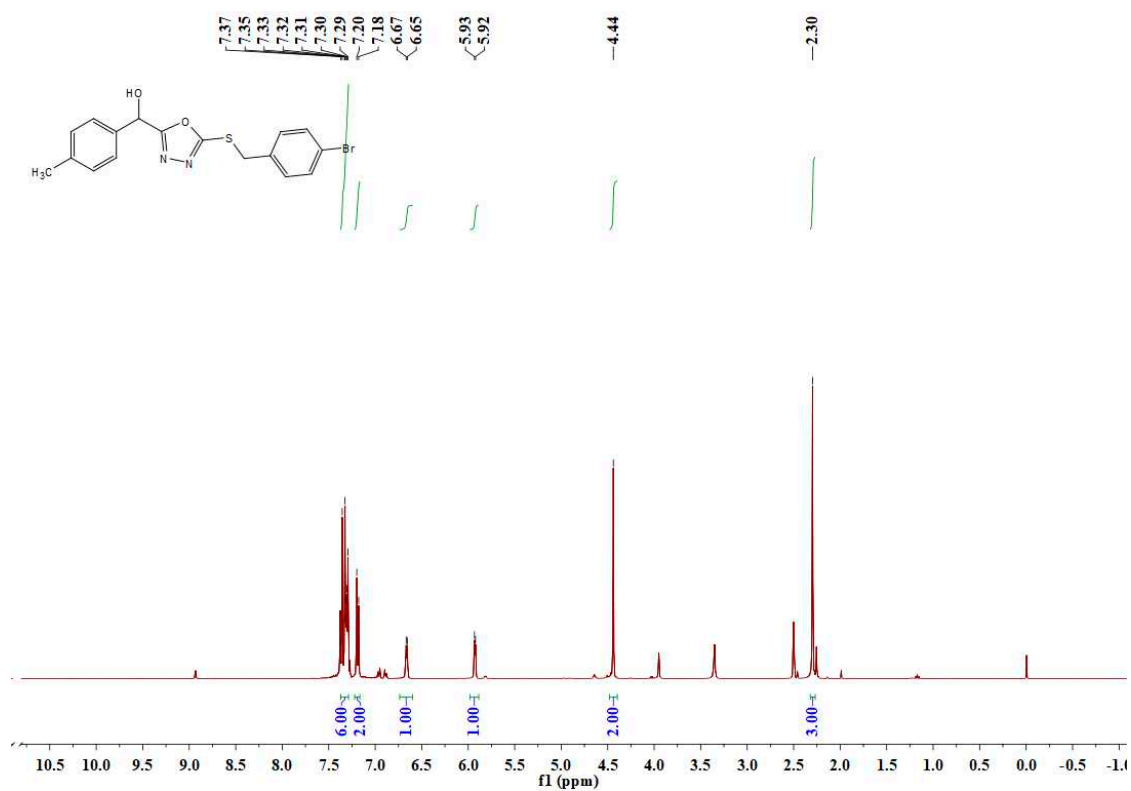

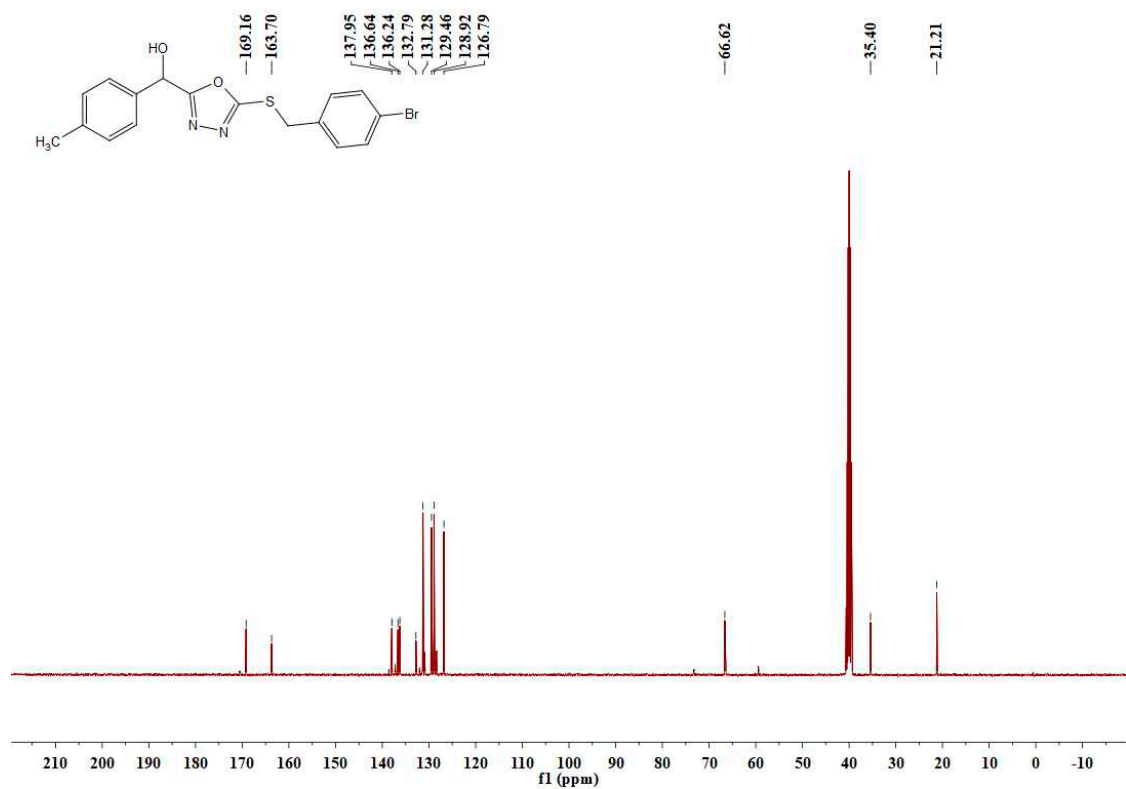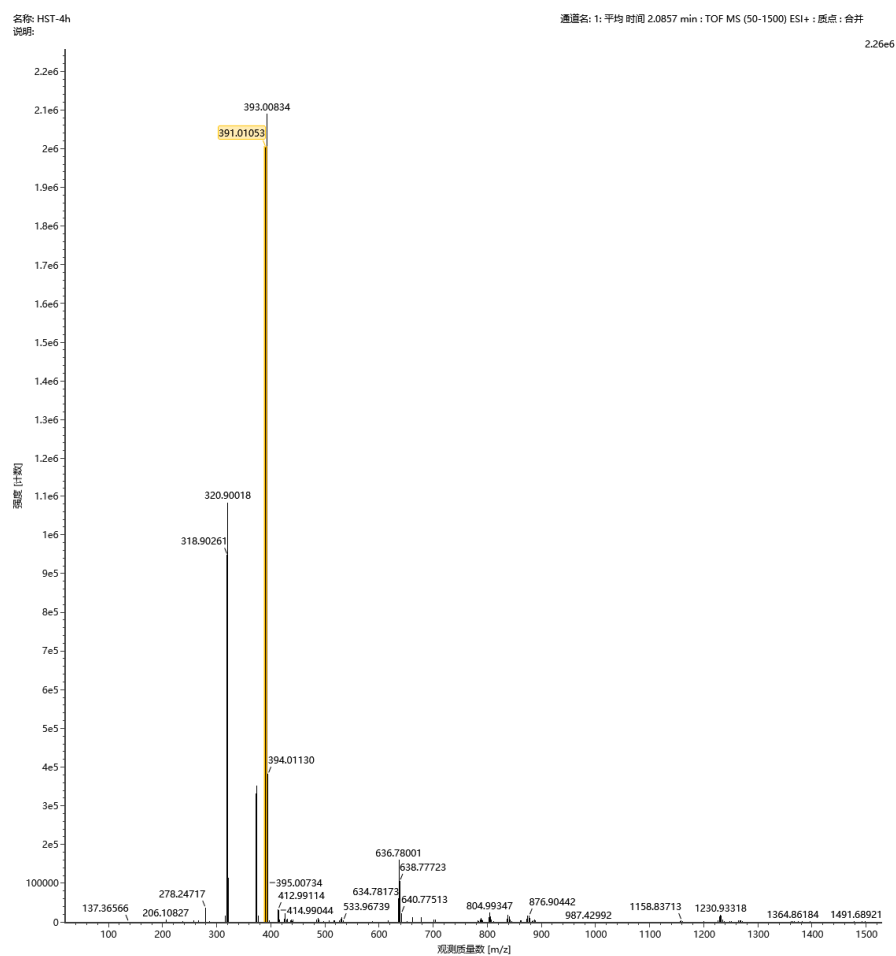

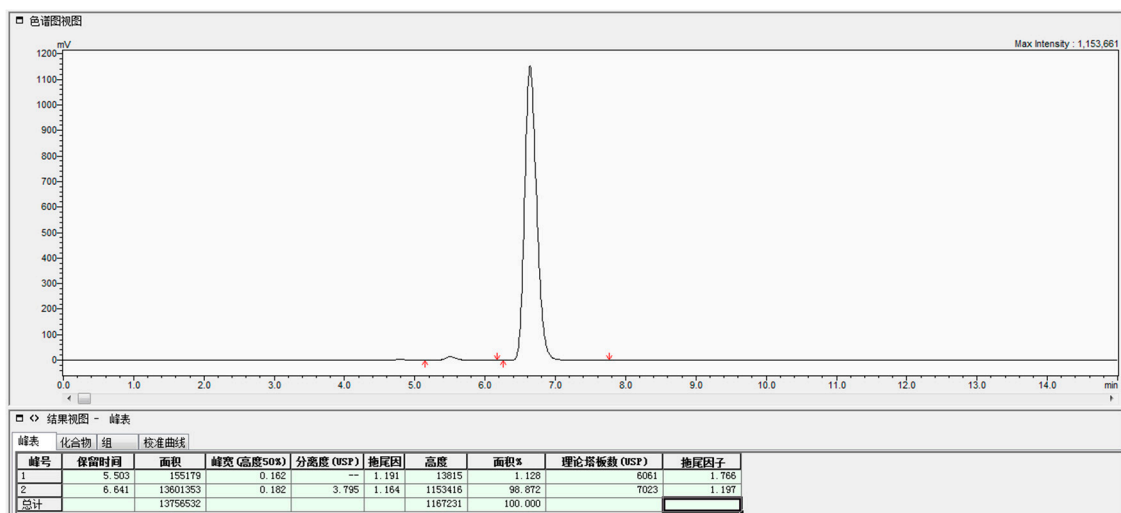

Figure S7.  $^1\text{H}$  NMR,  $^{13}\text{C}$  NMR, HRMS, and HPLC for E7.

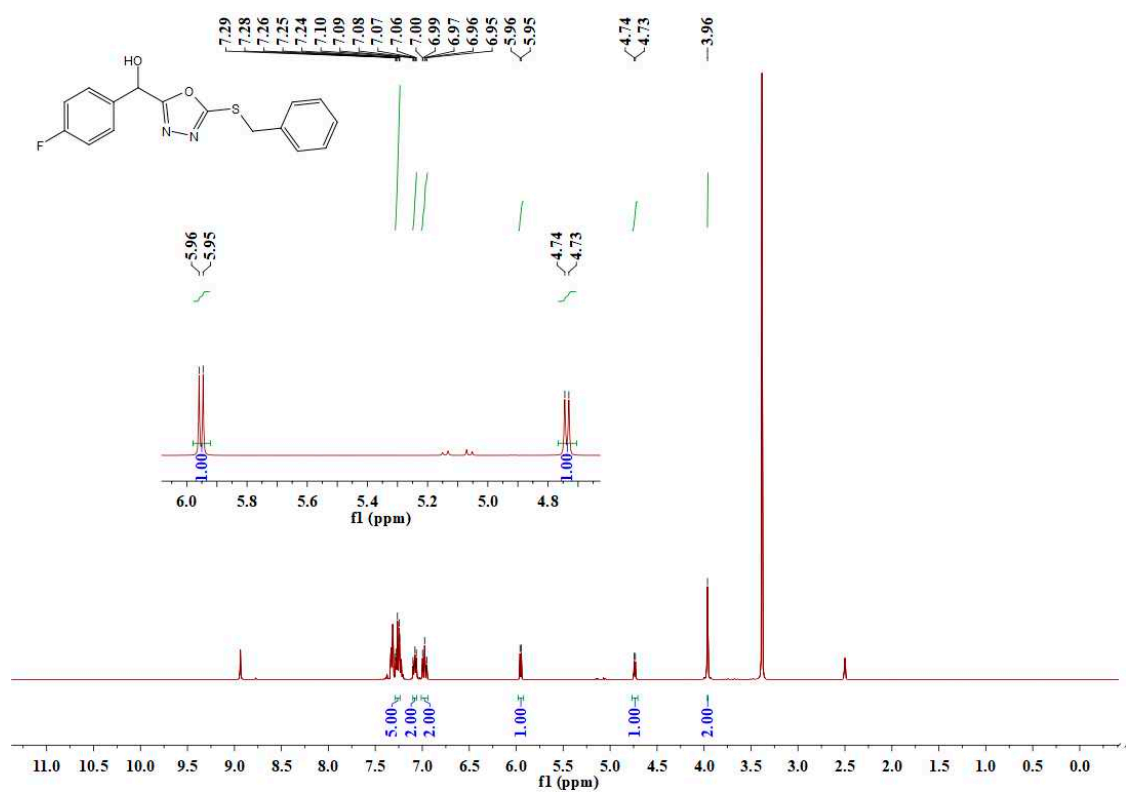

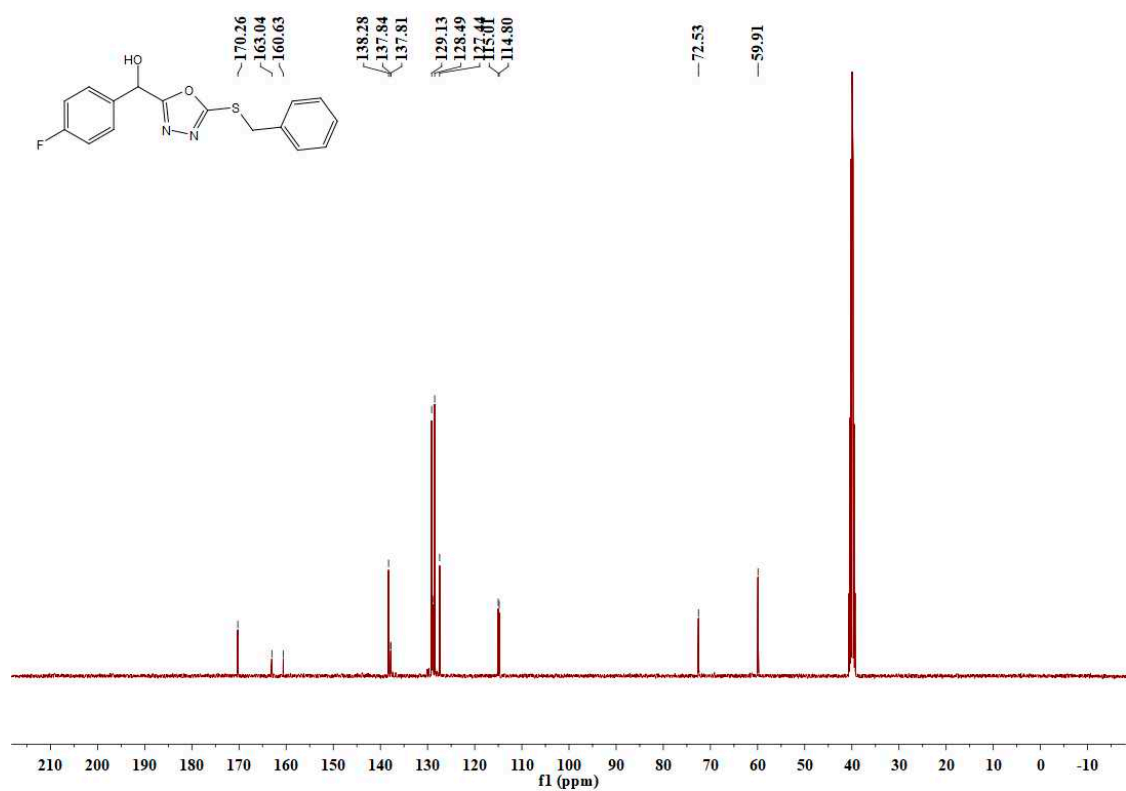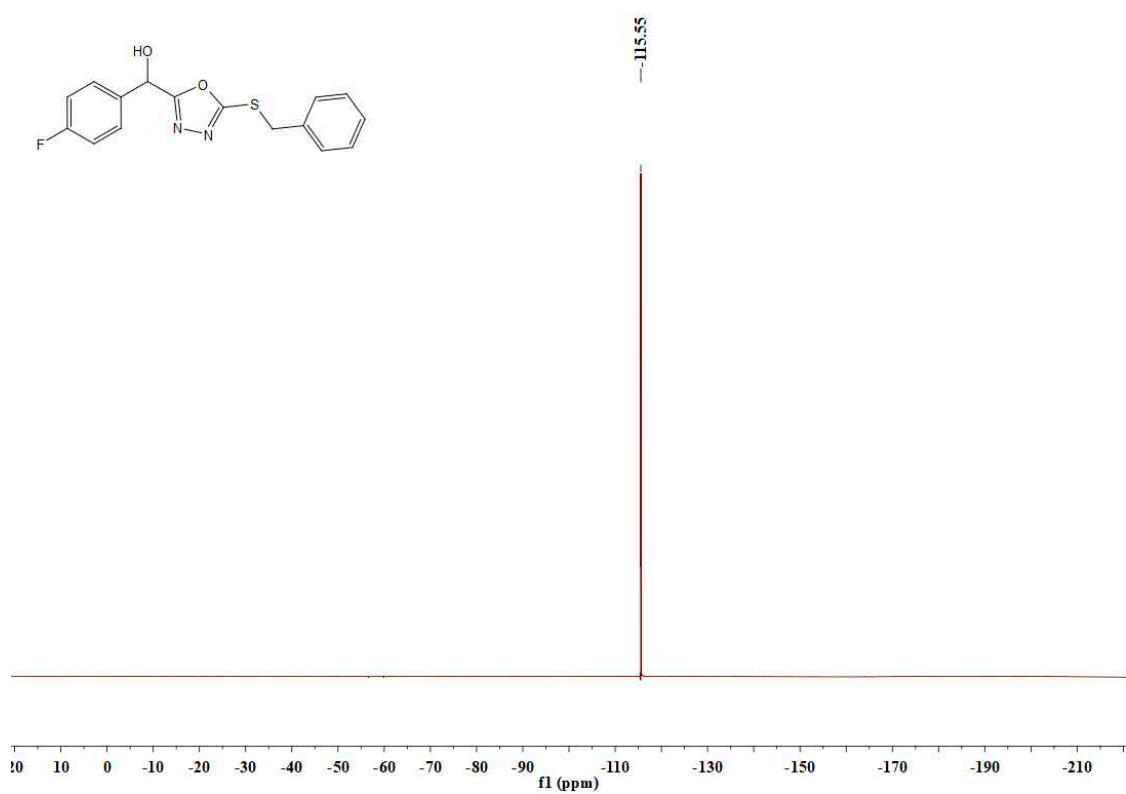



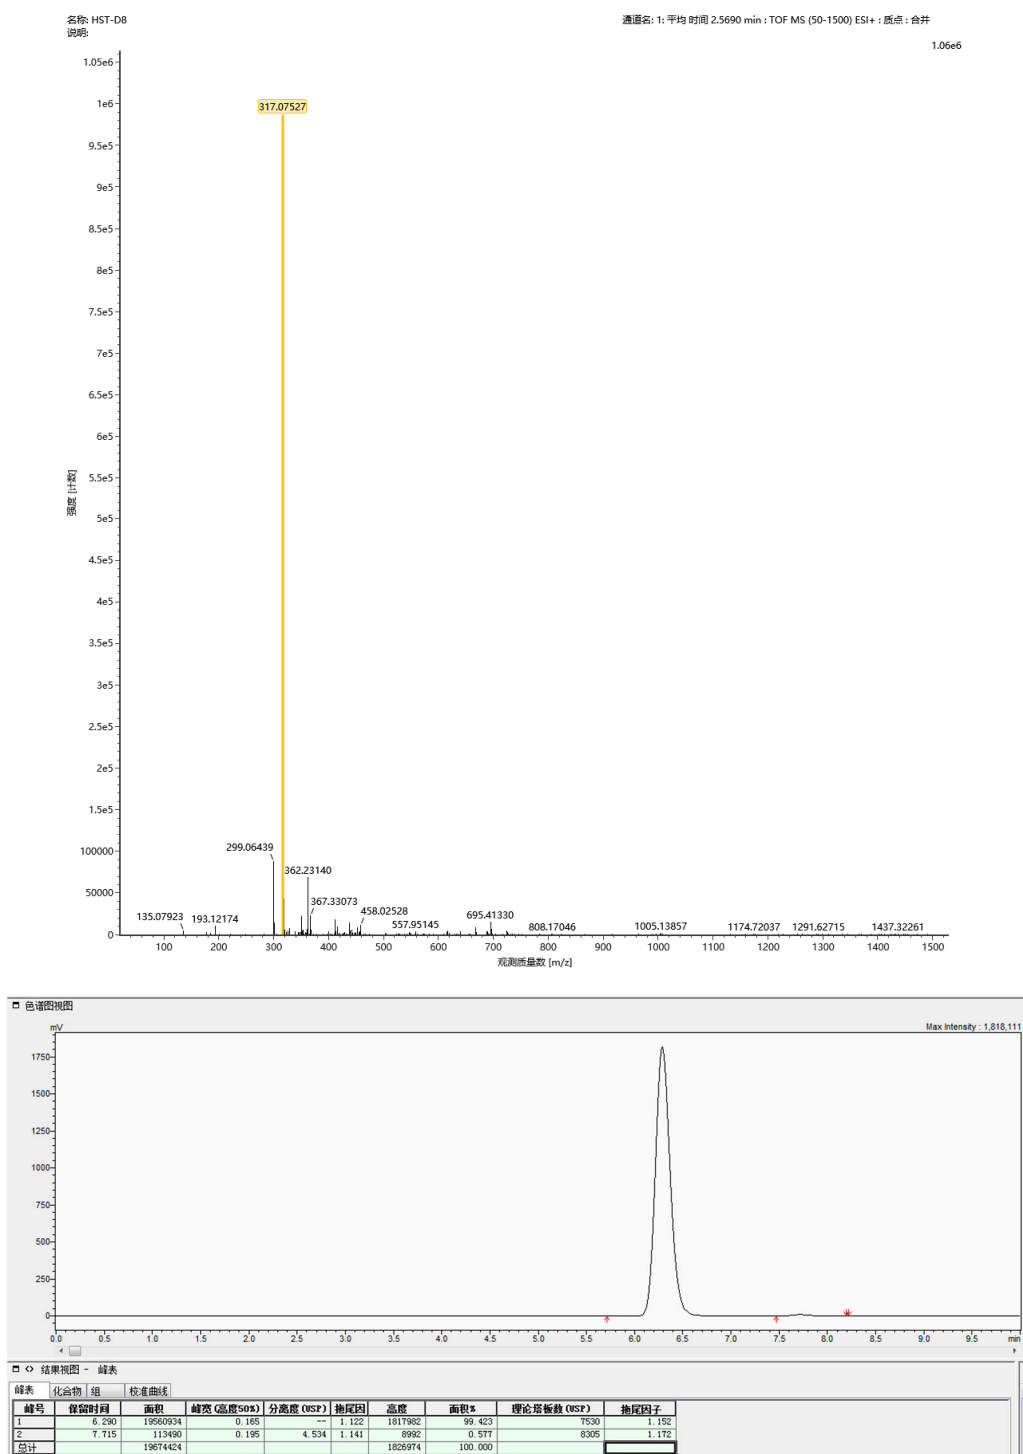

Figure S8.  $^1\text{H}$  NMR,  $^{13}\text{C}$  NMR,  $^{19}\text{F}$  NMR, HRMS and HPLC for **E8**.

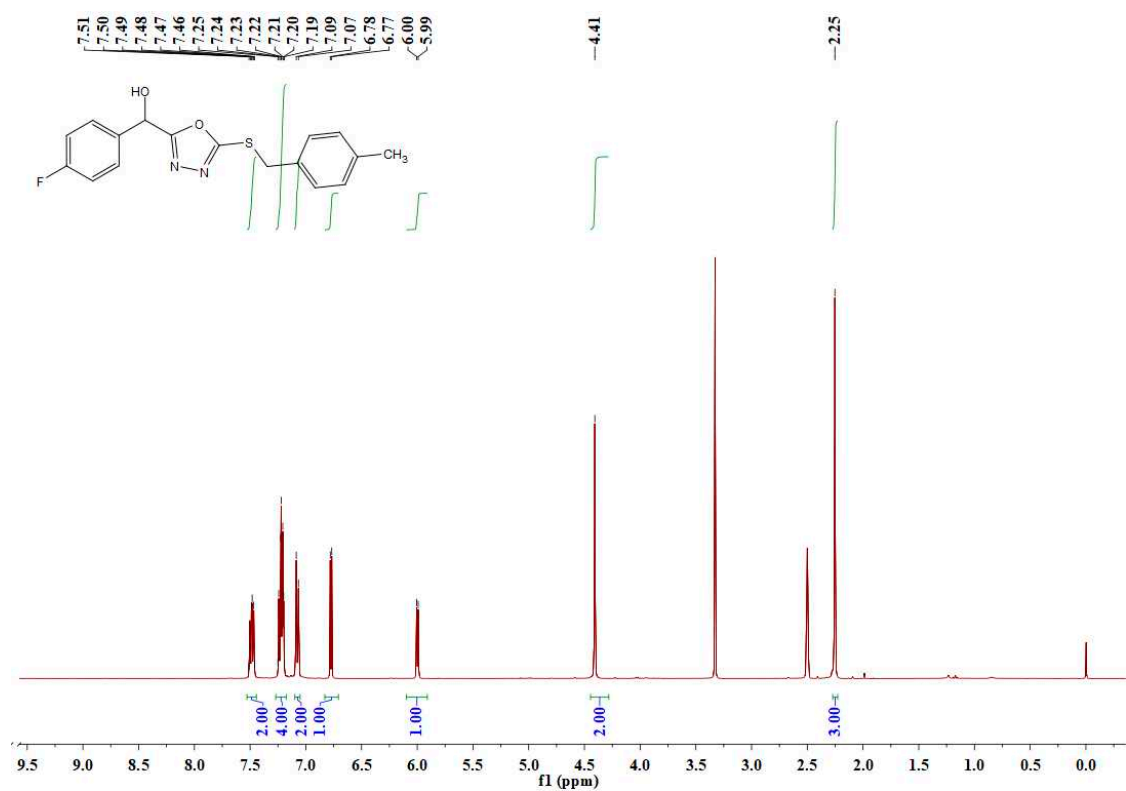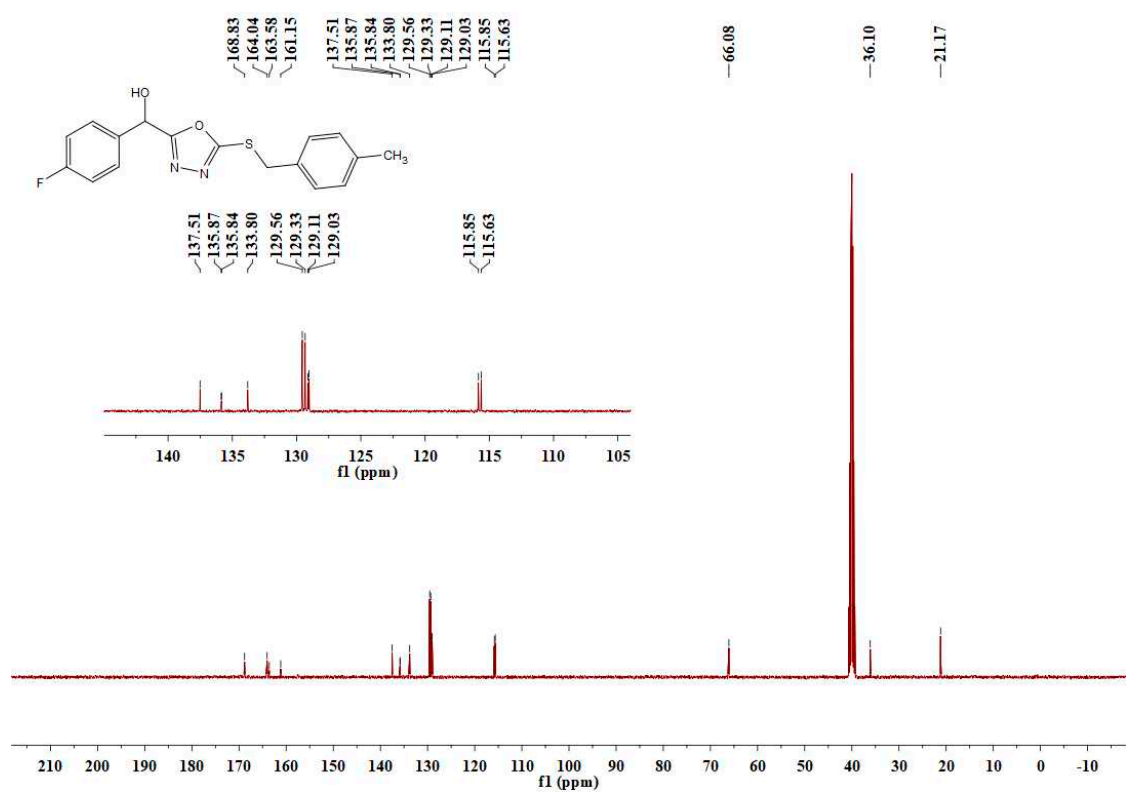

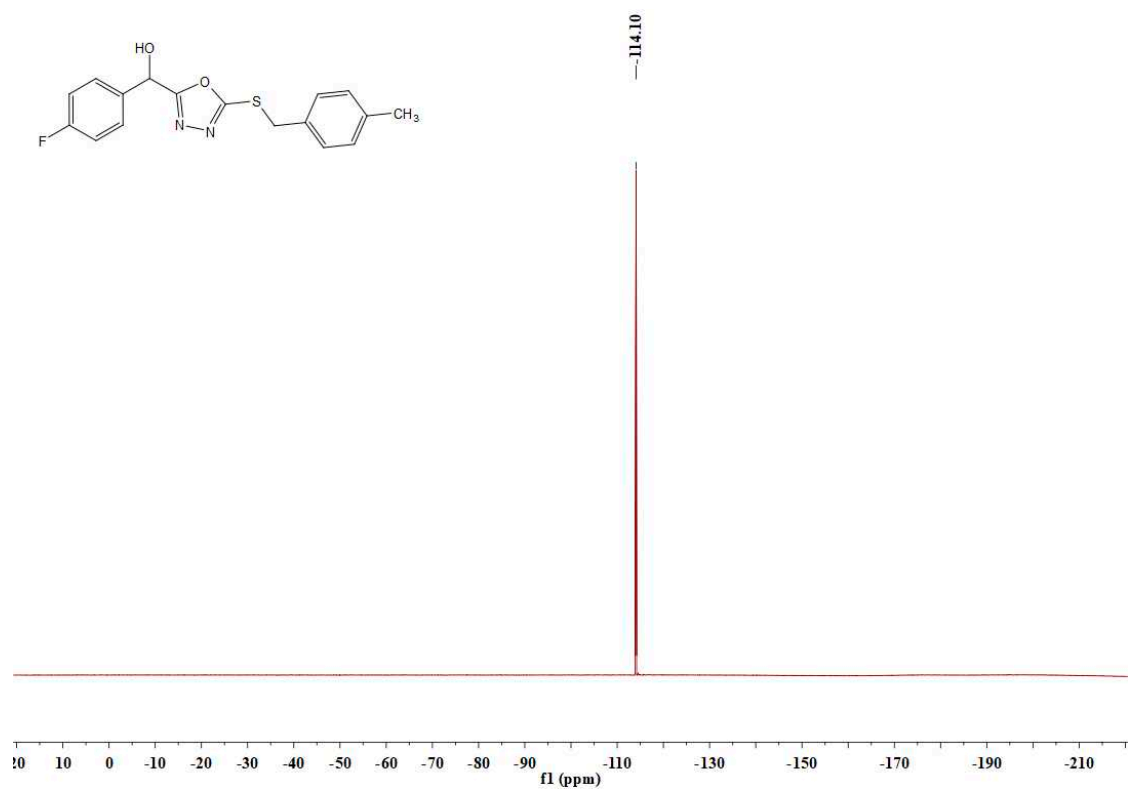

20181205108 #79 RT: 0.78 AV: 1 NL: 5.30E6  
T: FTMS+pESI Fullms[100.0000-1000.0000]

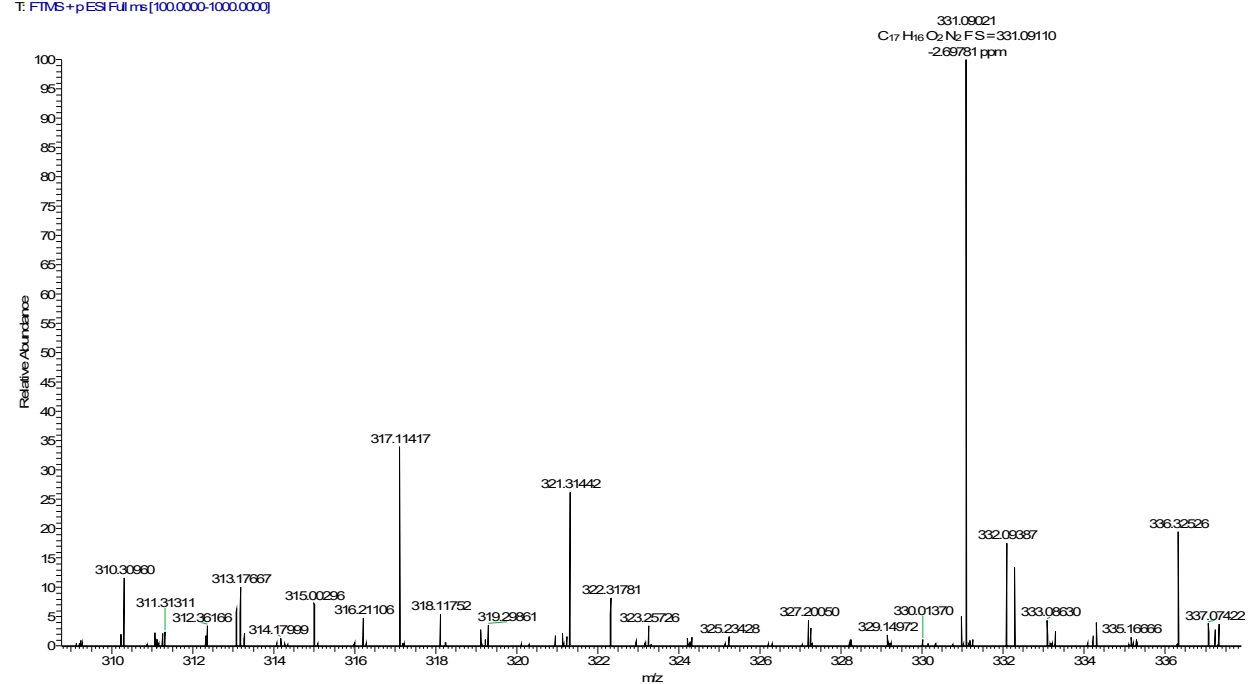

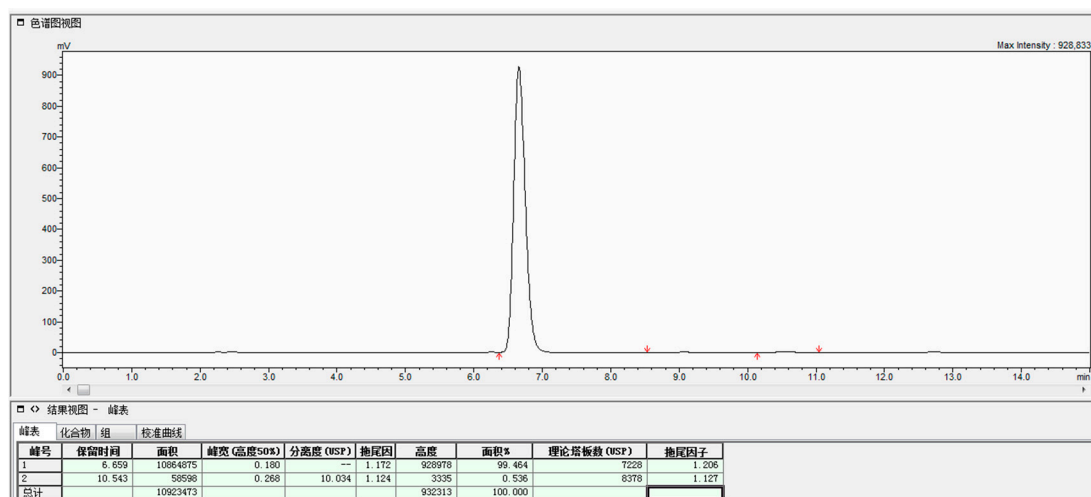

Figure S9.  $^1\text{H}$  NMR,  $^{13}\text{C}$  NMR,  $^{19}\text{F}$  NMR, HRMS and HPLC for E9.

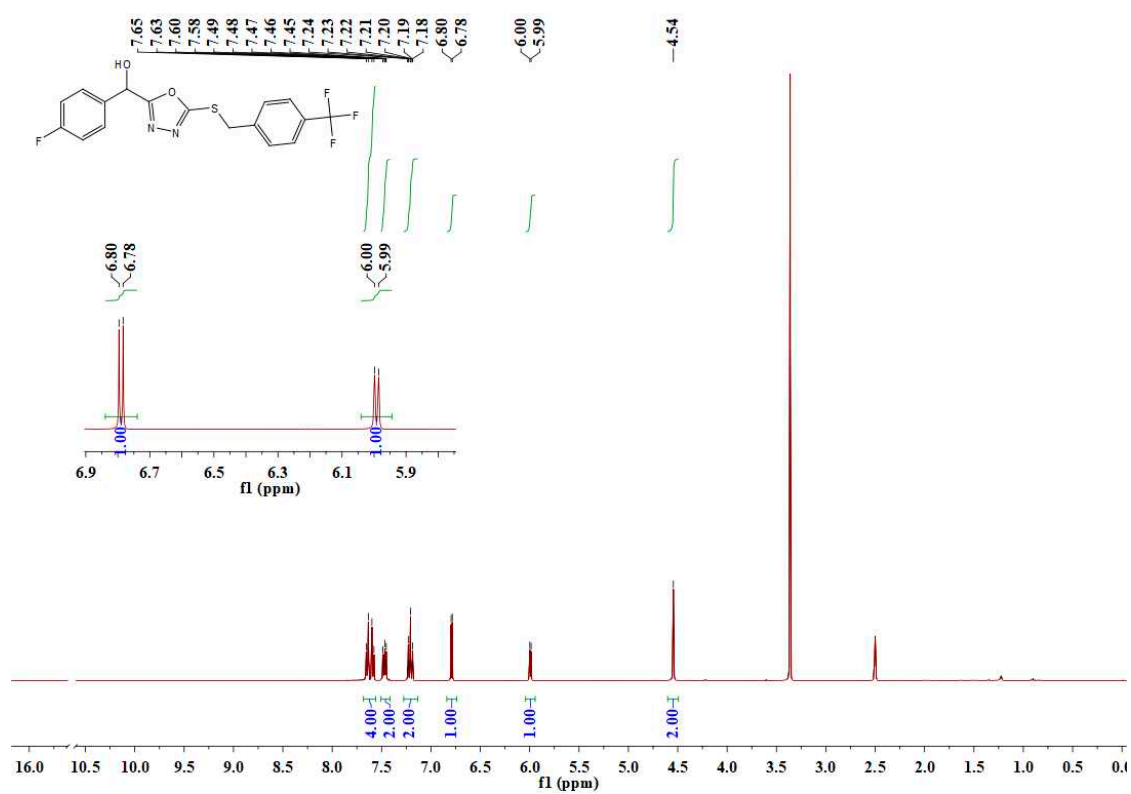

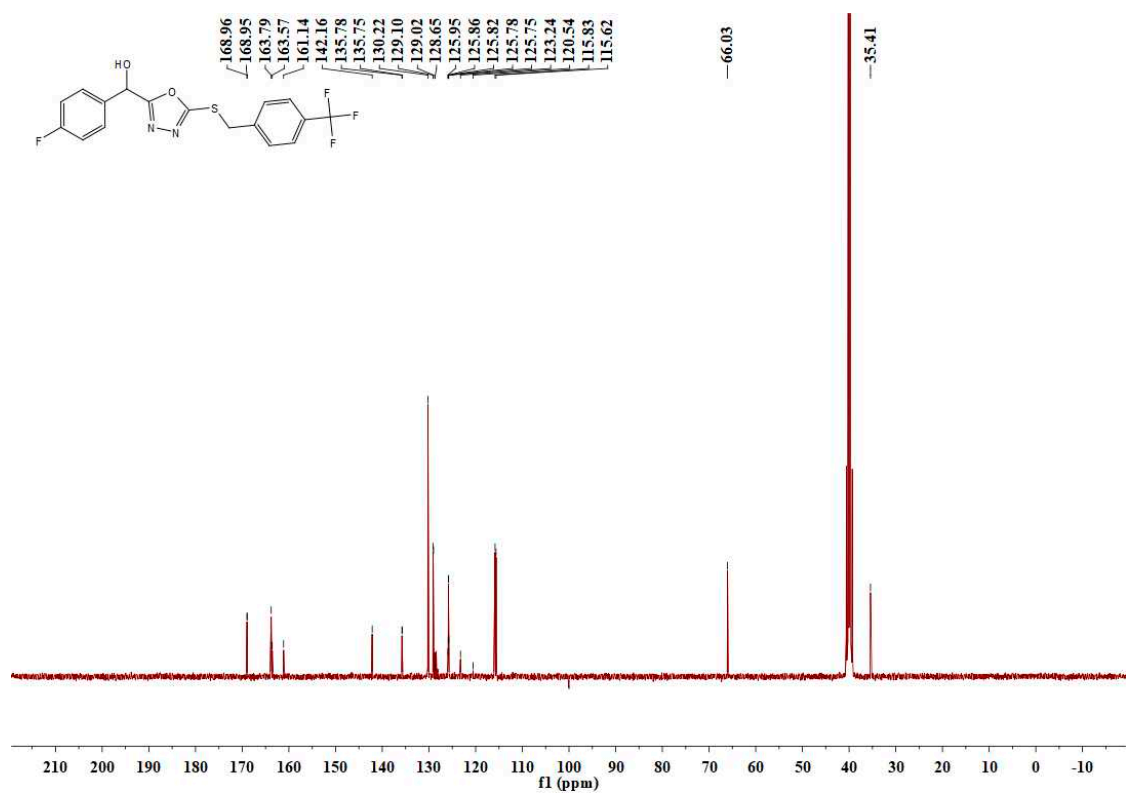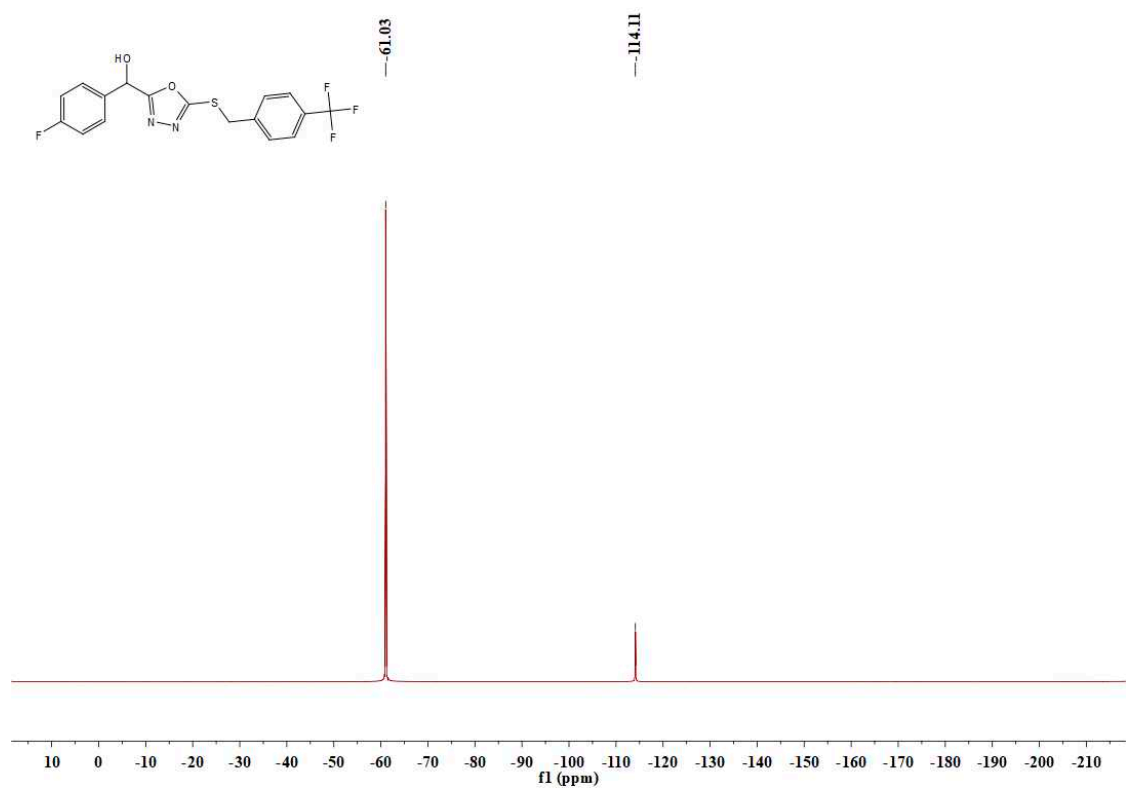

2018041706 #97 RT: 0.93 AV: 1 NL: 7.83E5  
T: FTMS+p.ESSIFull.ms[100.0000-1000.0000]

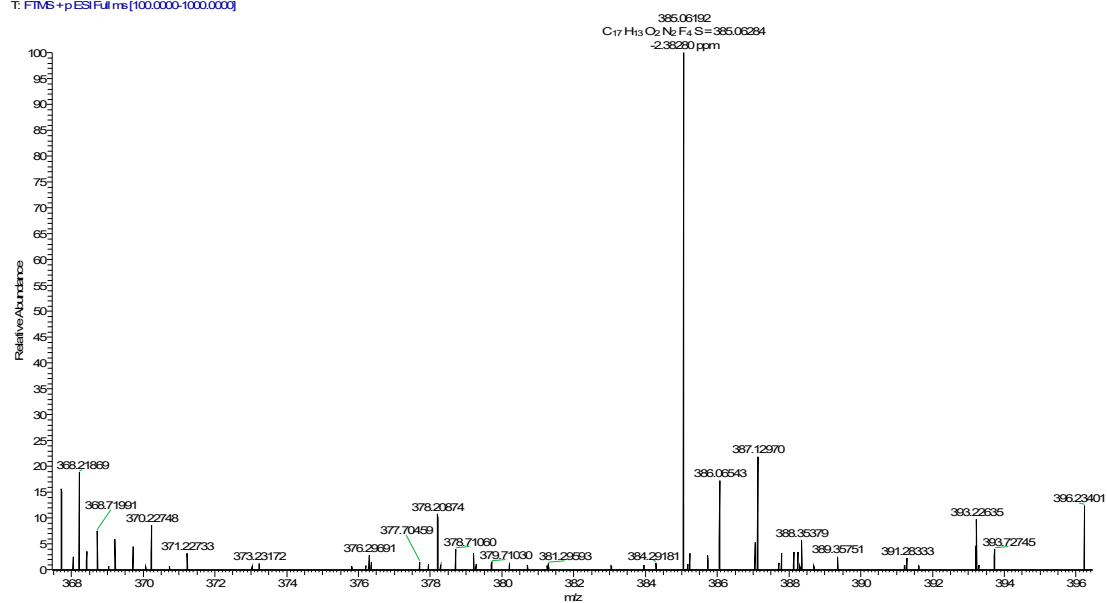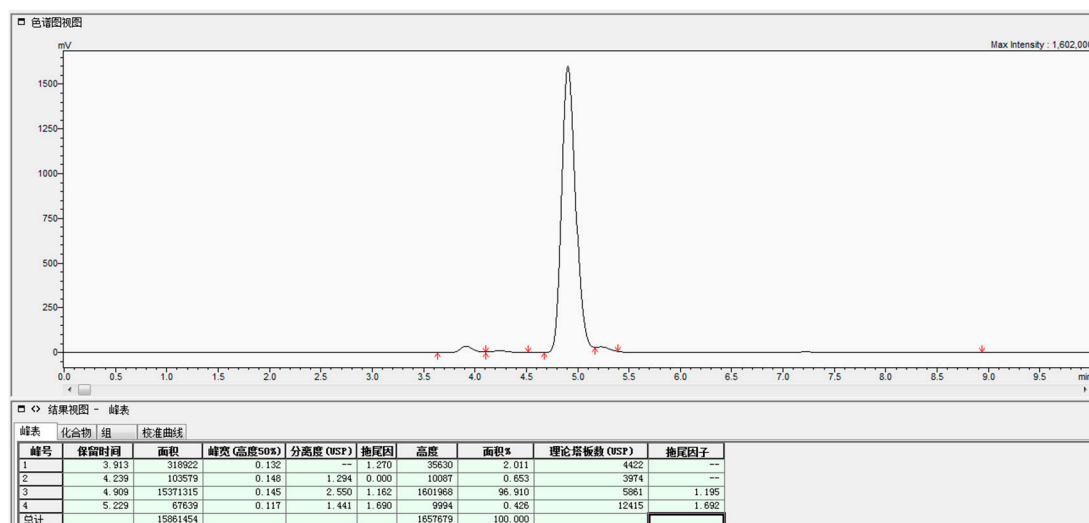

Figure S10.  $^1\text{H}$  NMR,  $^{13}\text{C}$  NMR,  $^{19}\text{F}$  NMR, HRMS and HPLC for **E**<sub>10</sub>.

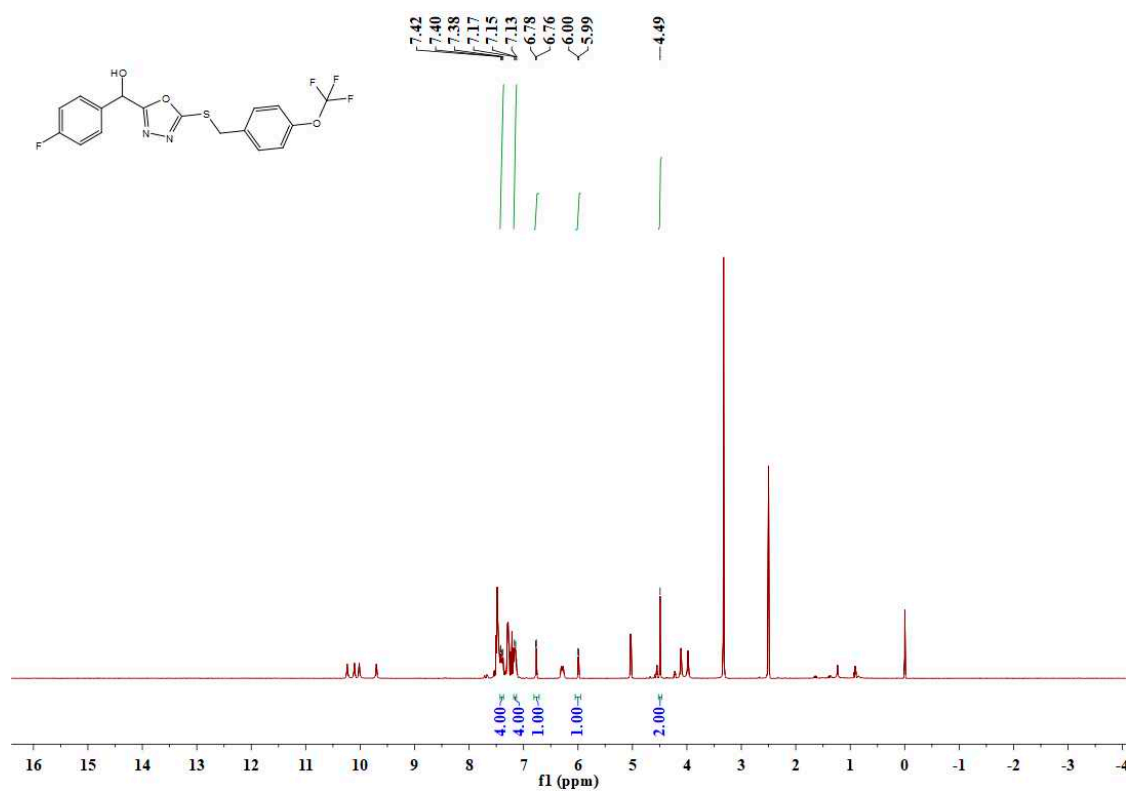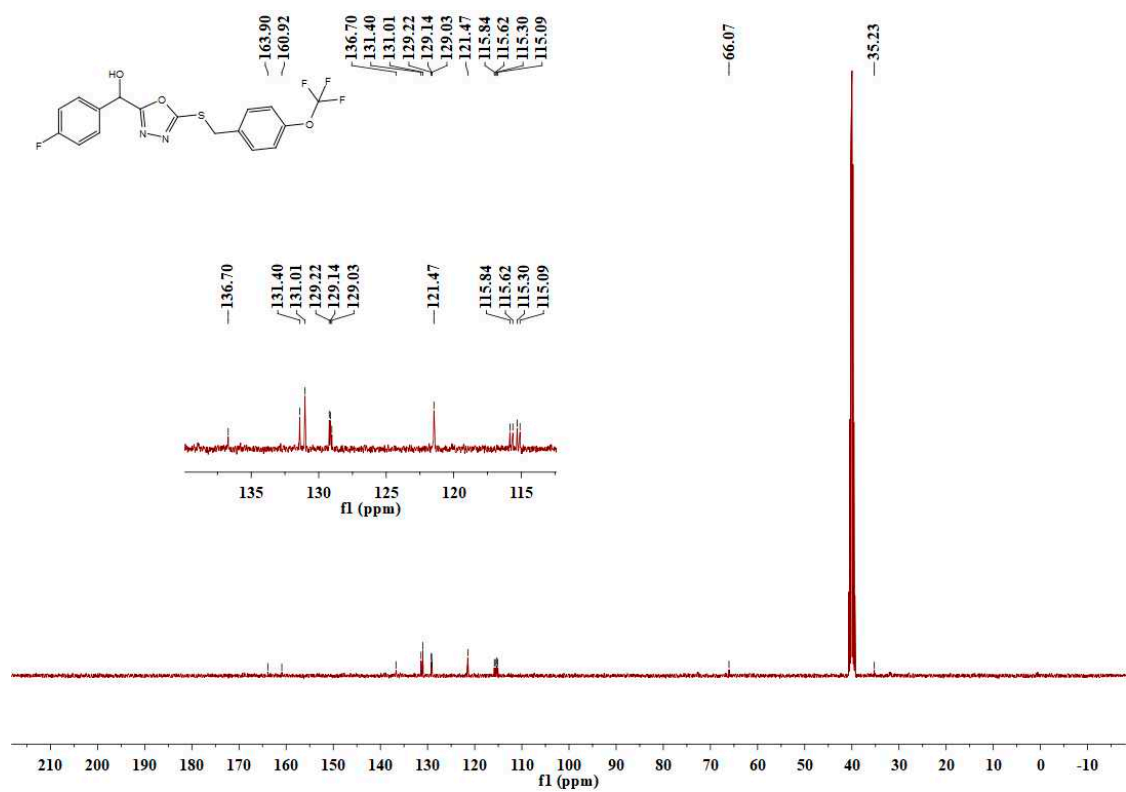

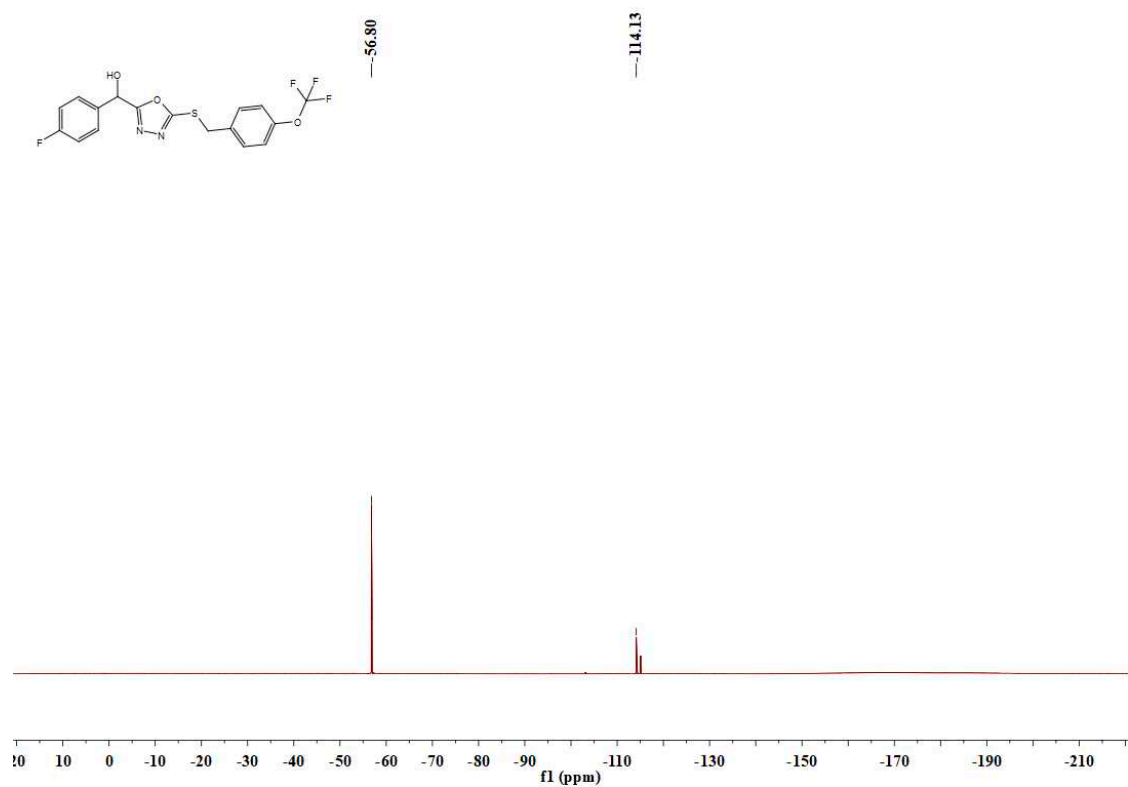

2018032365#93 RT: 0.91 AV: 1 NL: 3.88E7  
T: FTMS+pESFull.ms[100.0000-1000.0000]

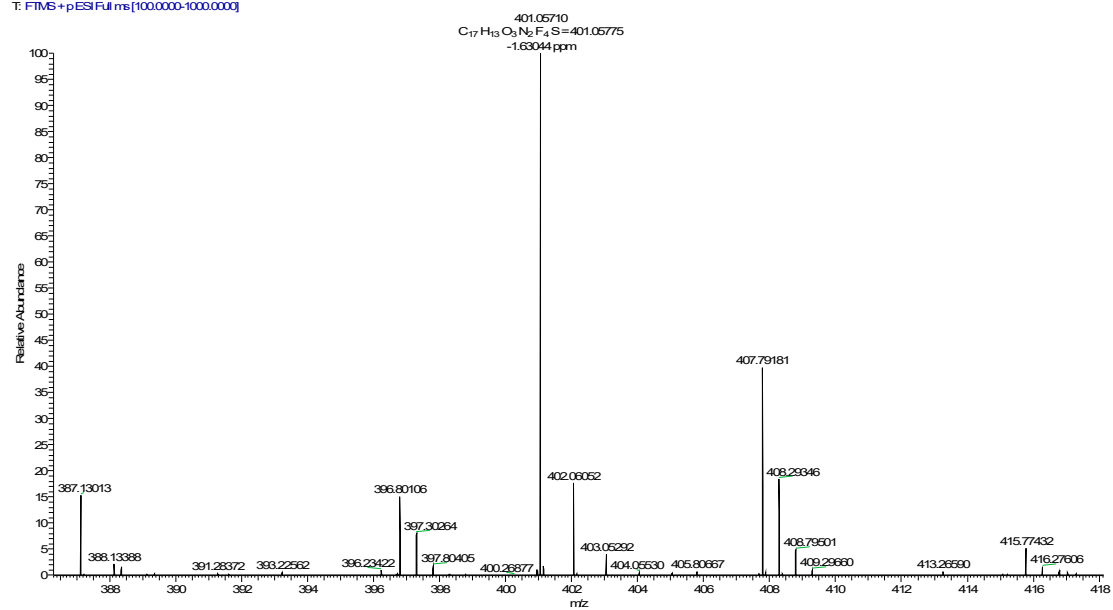



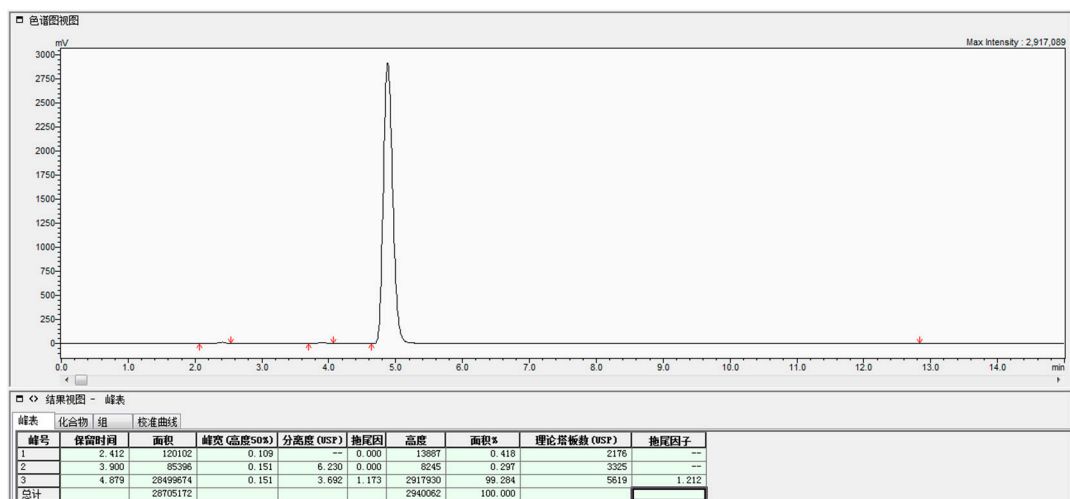

Figure S11.  $^1\text{H}$  NMR,  $^{13}\text{C}$  NMR,  $^{19}\text{F}$  NMR, HRMS and HPLC for **E11**.

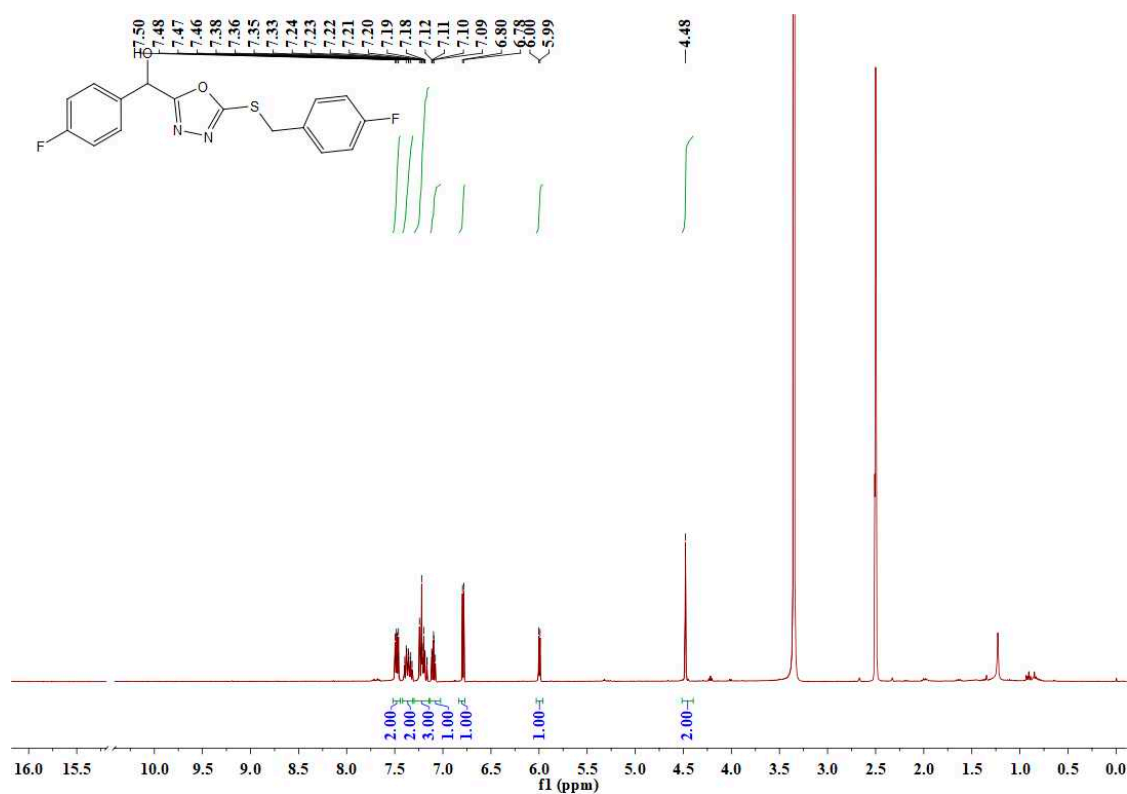

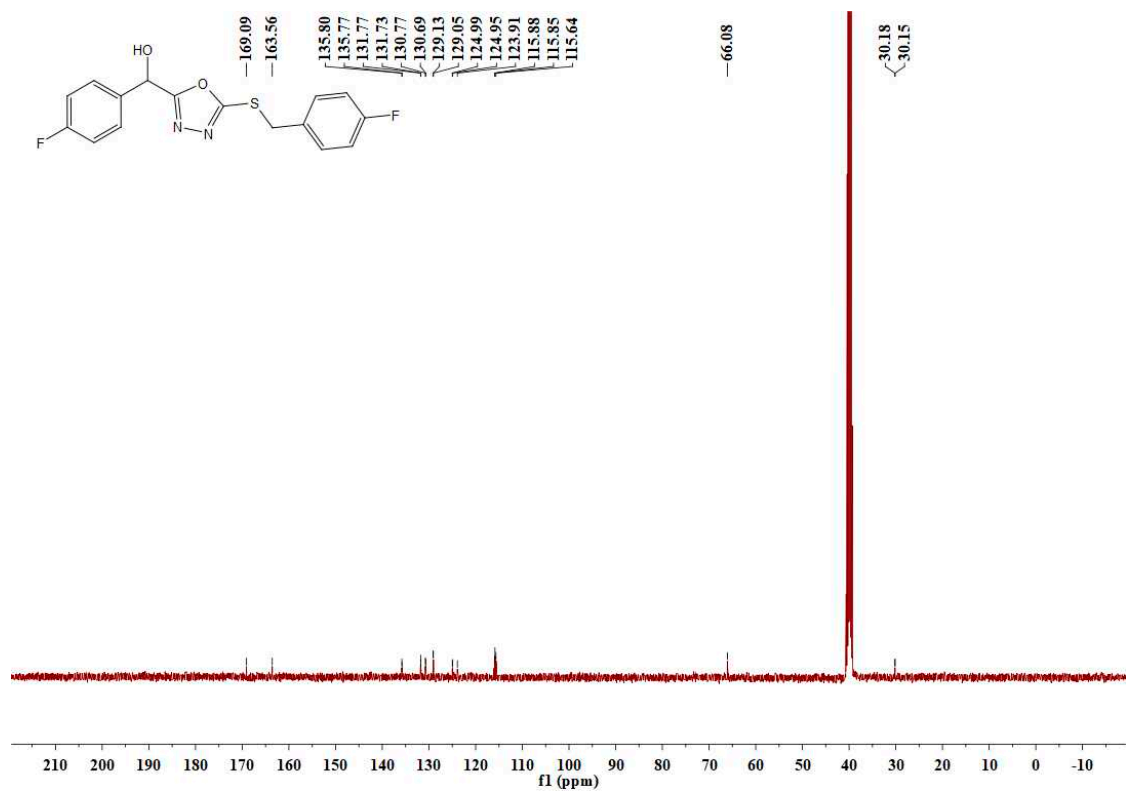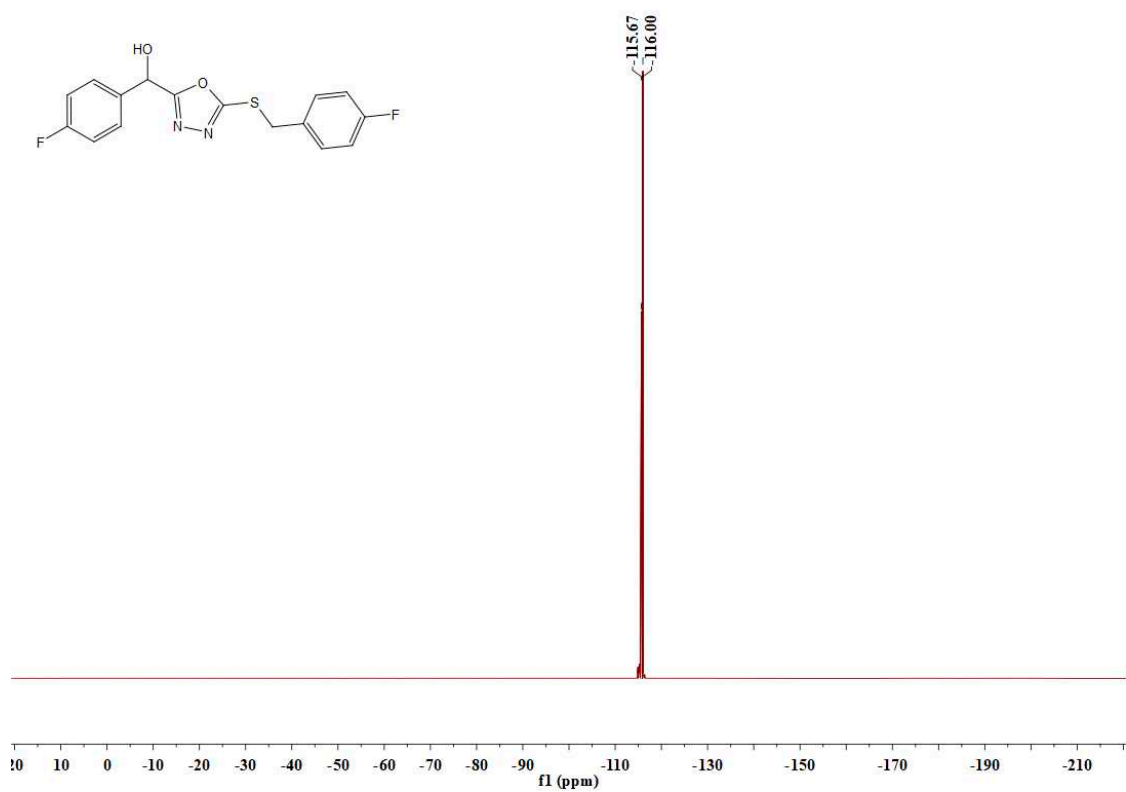

2018032304 #83 RT: 0.81 AV: 1 NL: 1.85E7  
T: FTMS + pESI Full ms [100.0000-1000.0000]

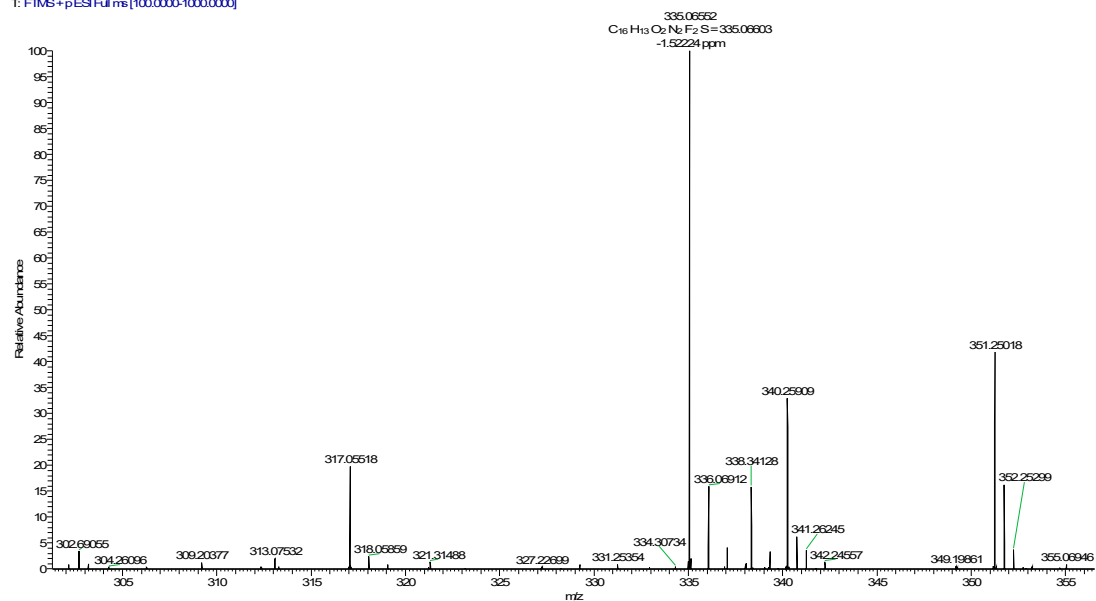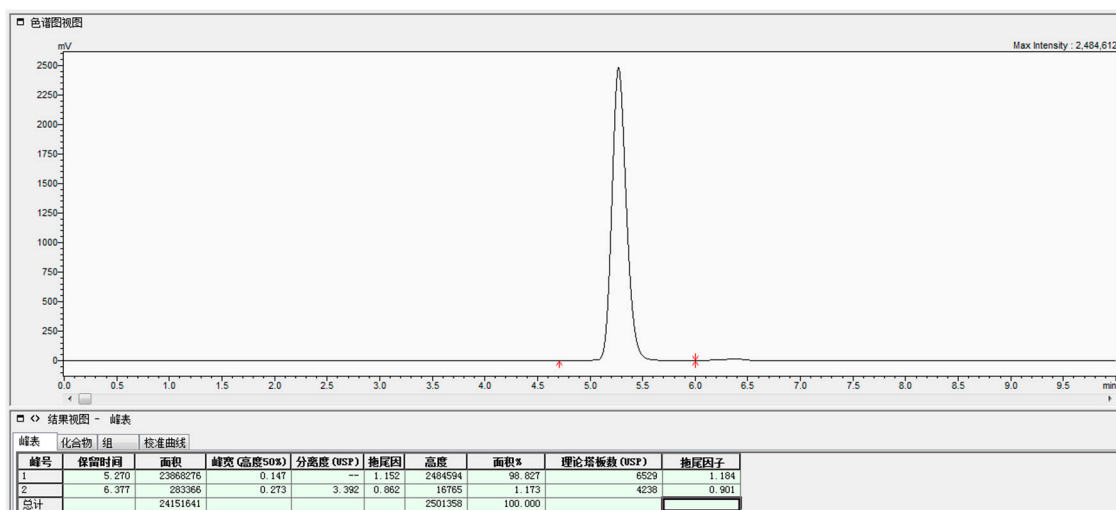

Figure S12.  $^1\text{H}$  NMR,  $^{13}\text{C}$  NMR,  $^{19}\text{F}$  NMR, HRMS and HPLC for **E12**.

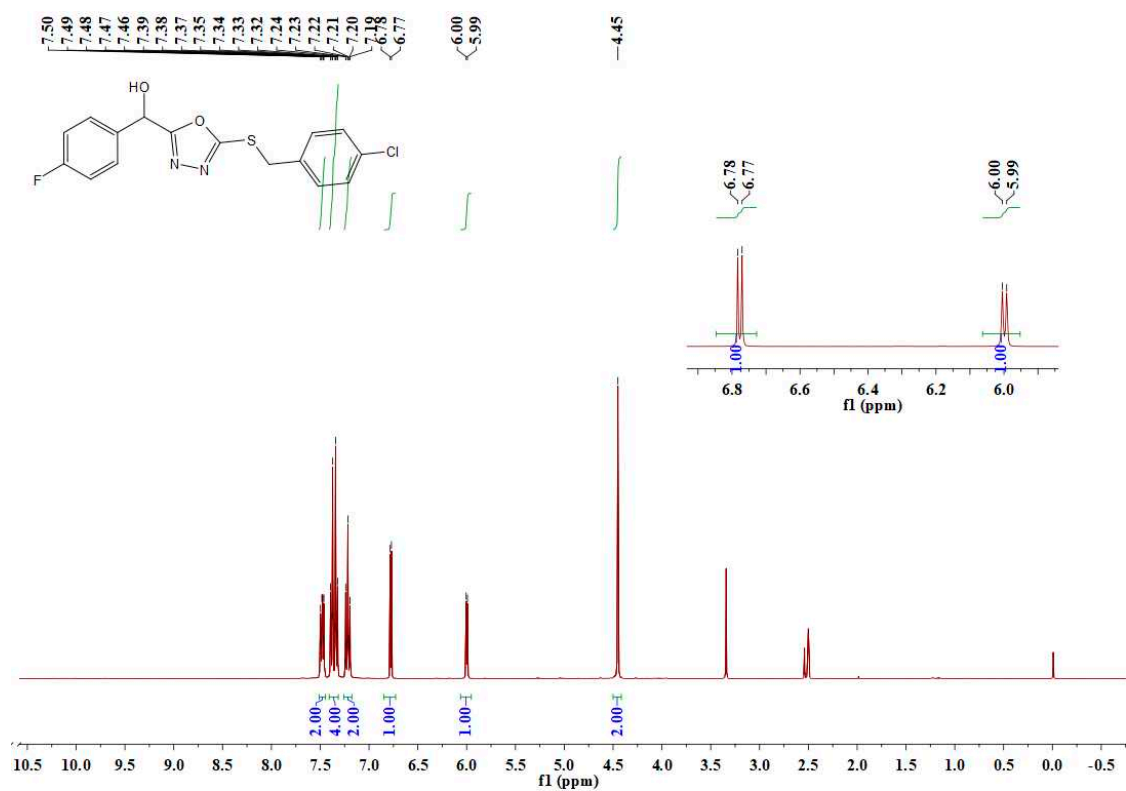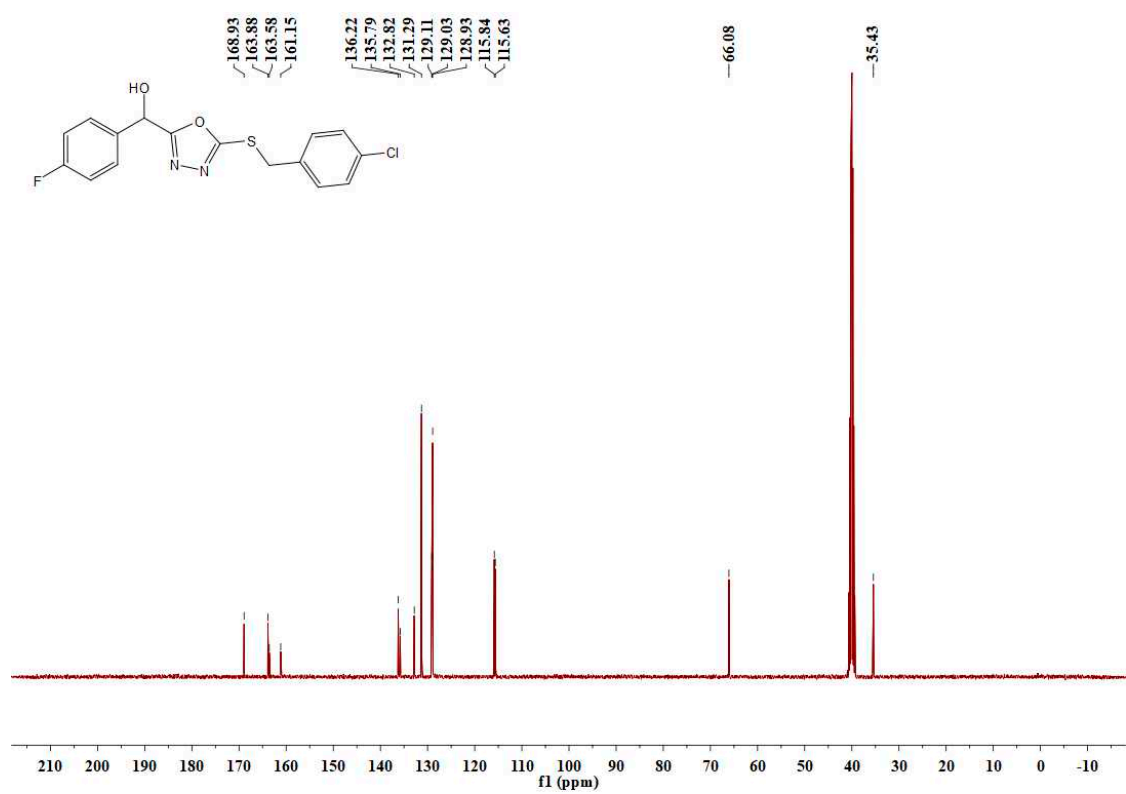

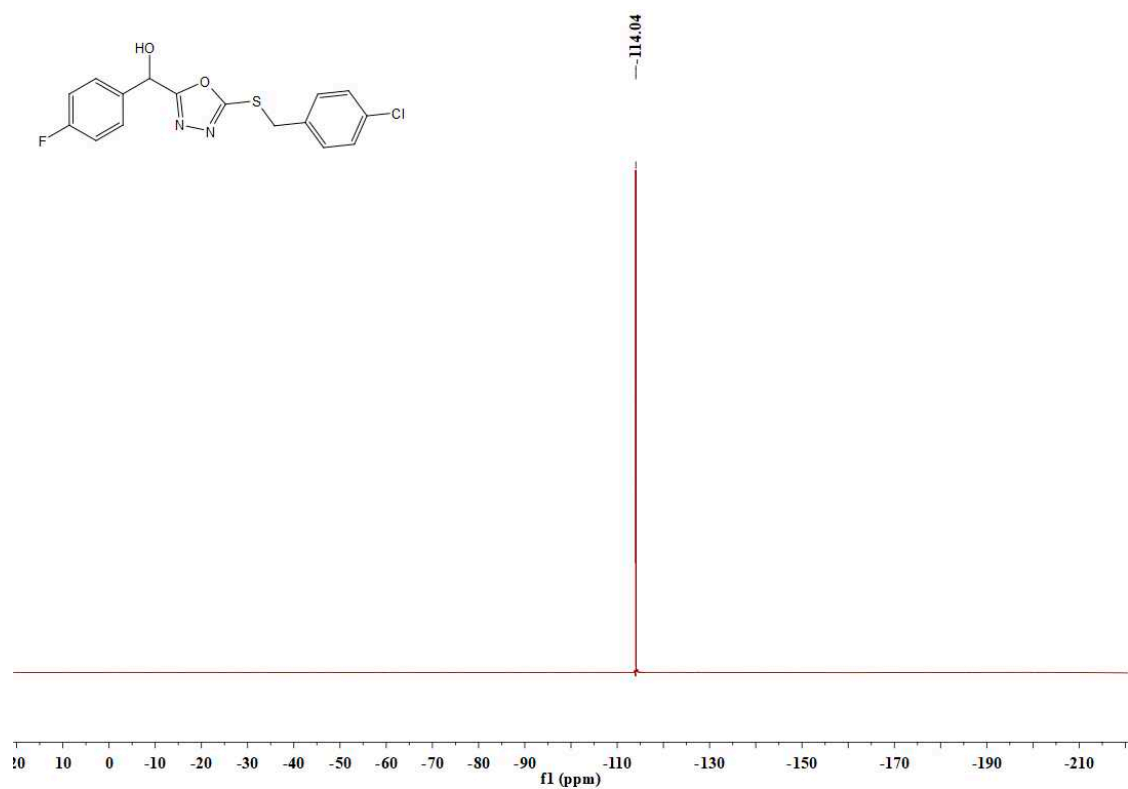

2018120510E #77 RT: 0.77 AV: 1 NL: 6.0366  
T: FTMS+pESI Full ms [100.0000-1000.0000]

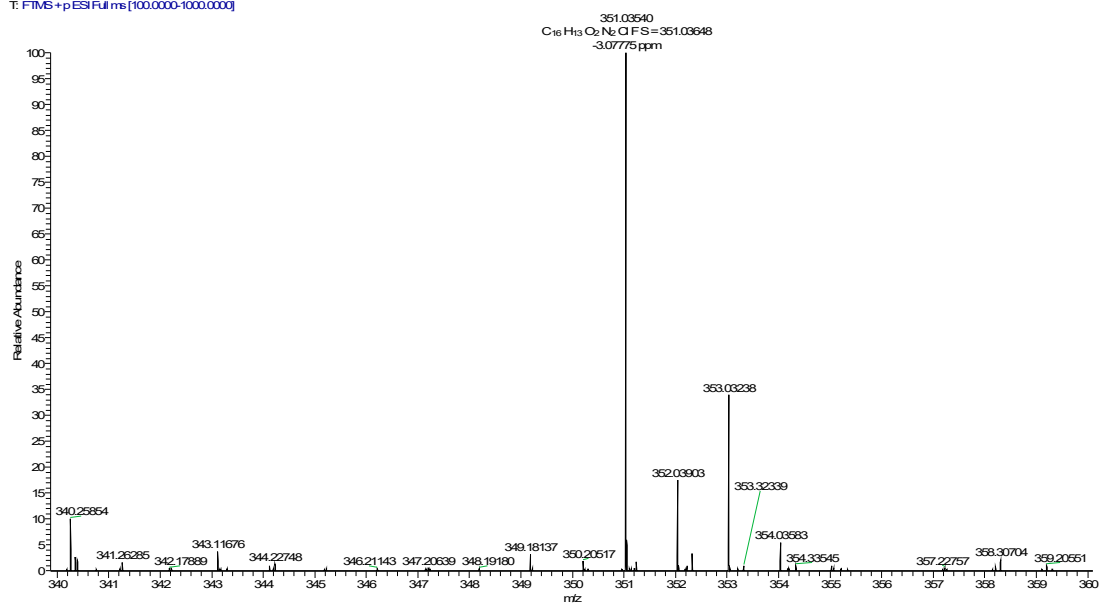

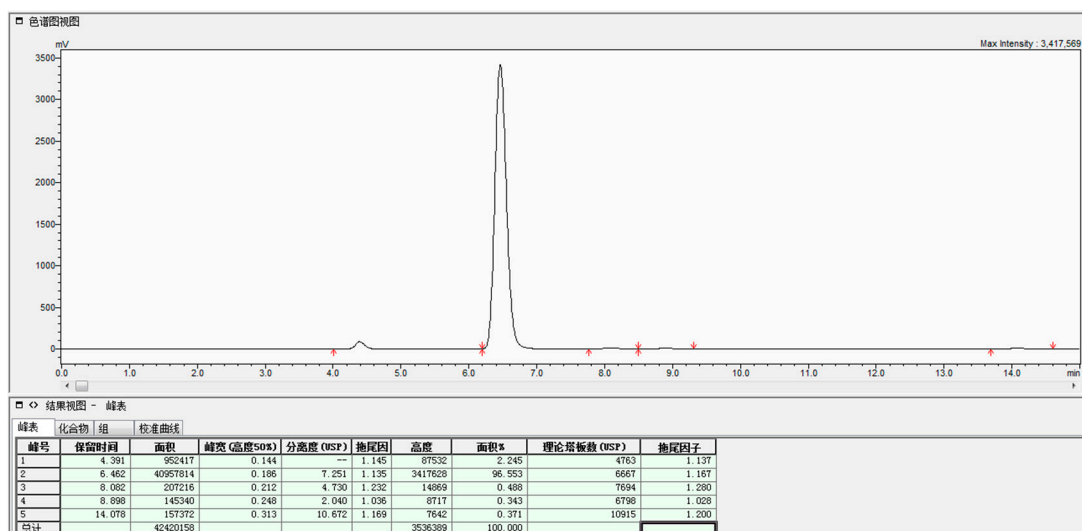

Figure S13.  $^1\text{H}$  NMR,  $^{13}\text{C}$  NMR,  $^{19}\text{F}$  NMR, HRMS and HPLC for **E13**.

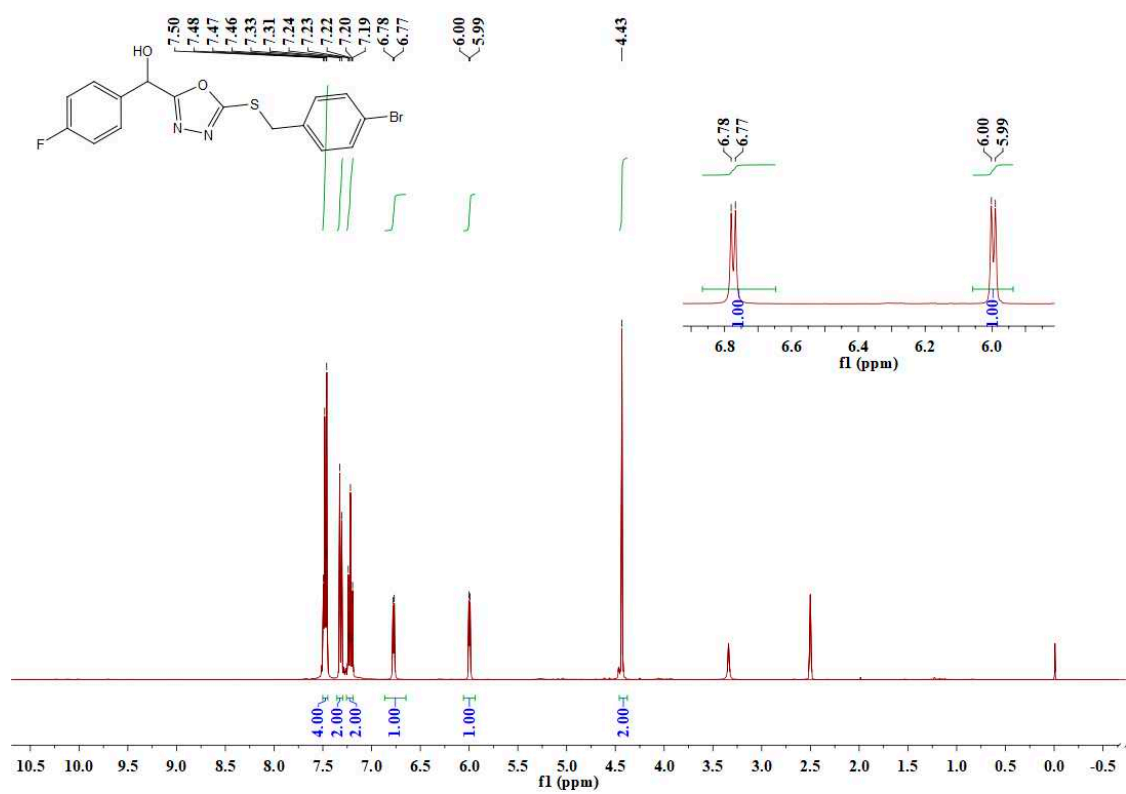

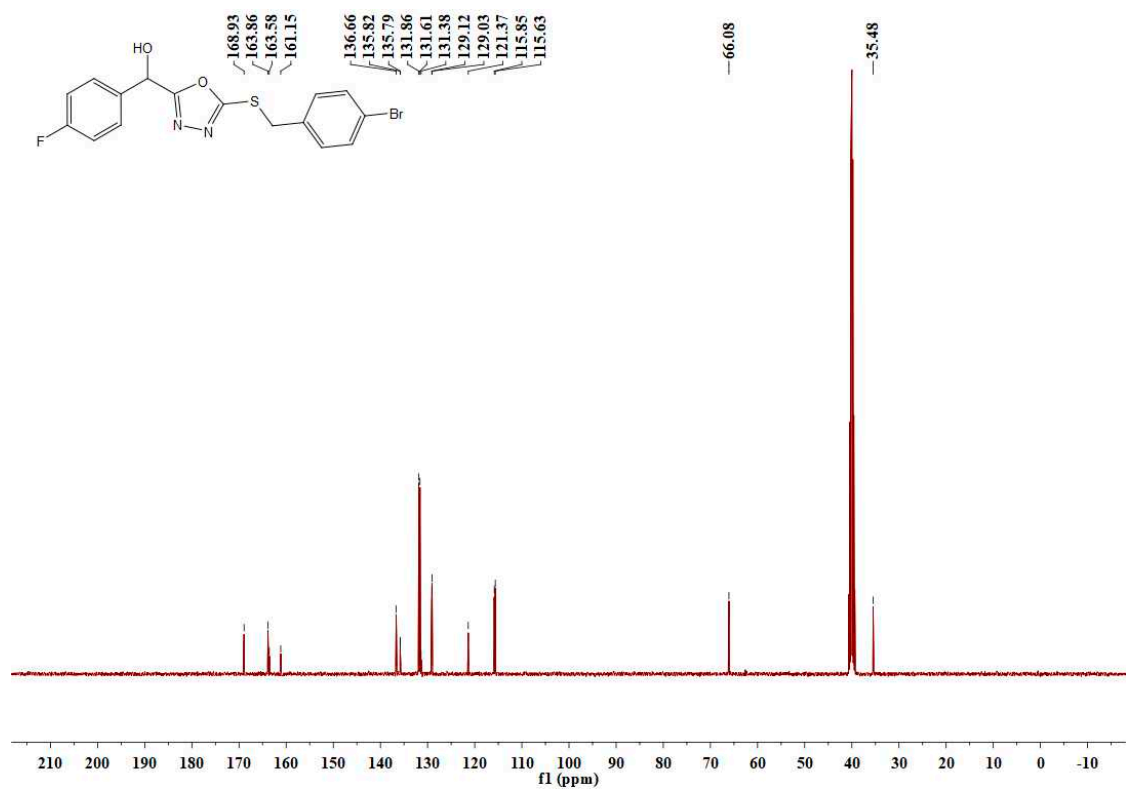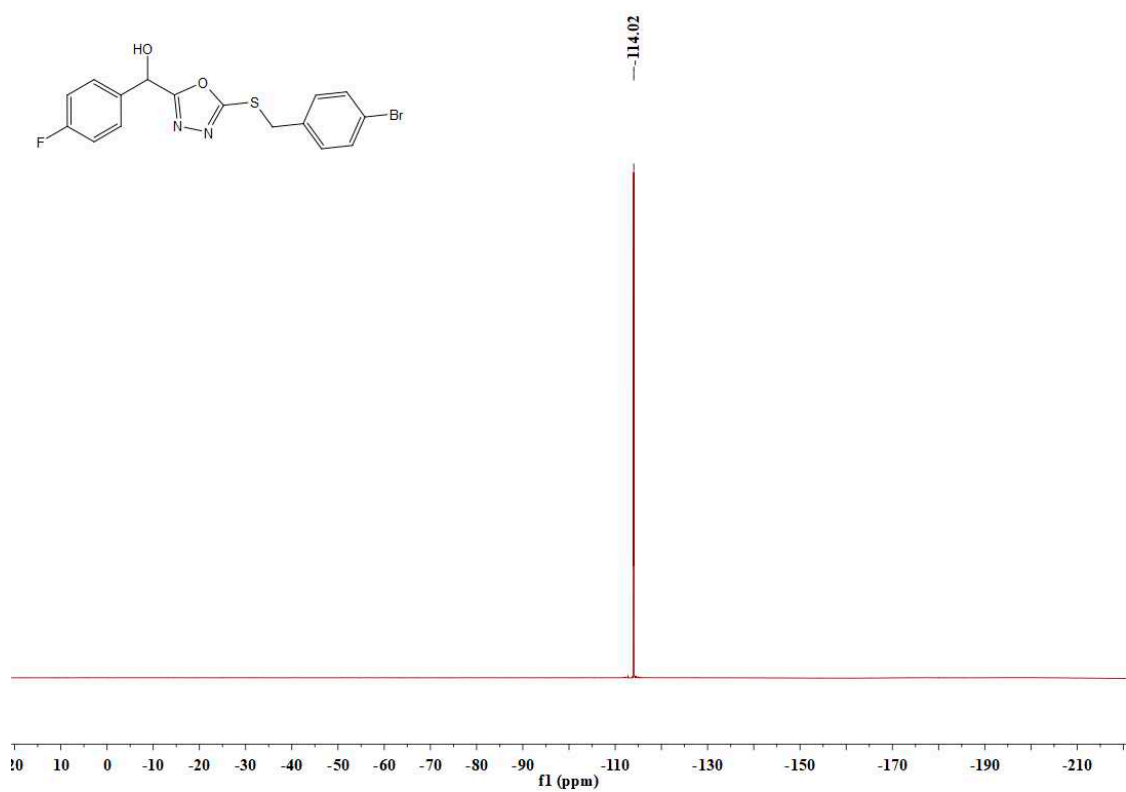

20181205107 #75 RE: 0.75 AV: 1 NL: 1.39E7  
T: FTMS+pESI Full ms [100.0000-1000.0000]

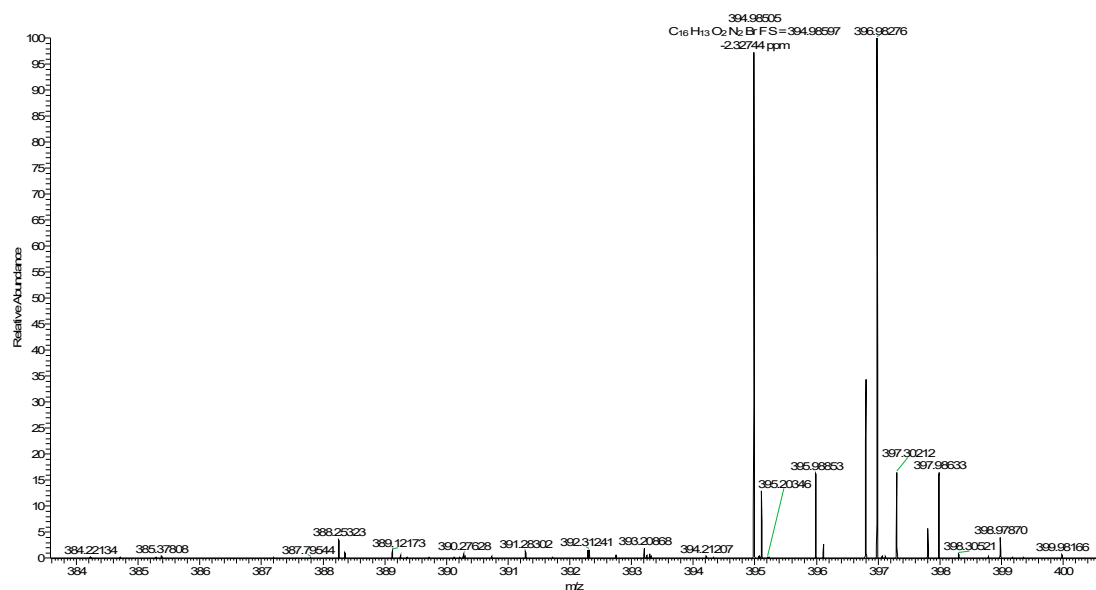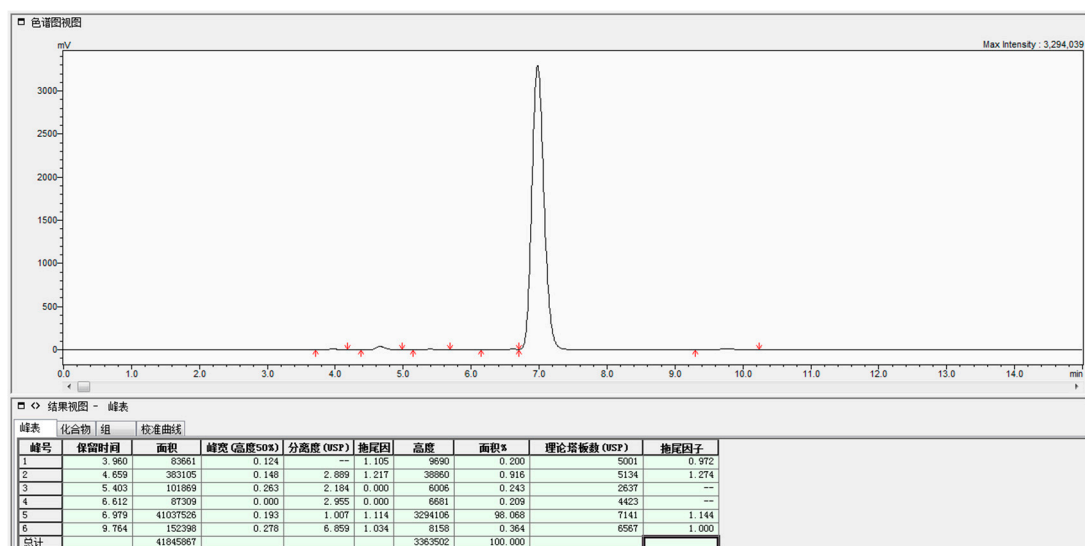

Figure S14.  $^1H$  NMR,  $^{13}C$  NMR,  $^{19}F$  NMR, HRMS and HPLC for **E14**.



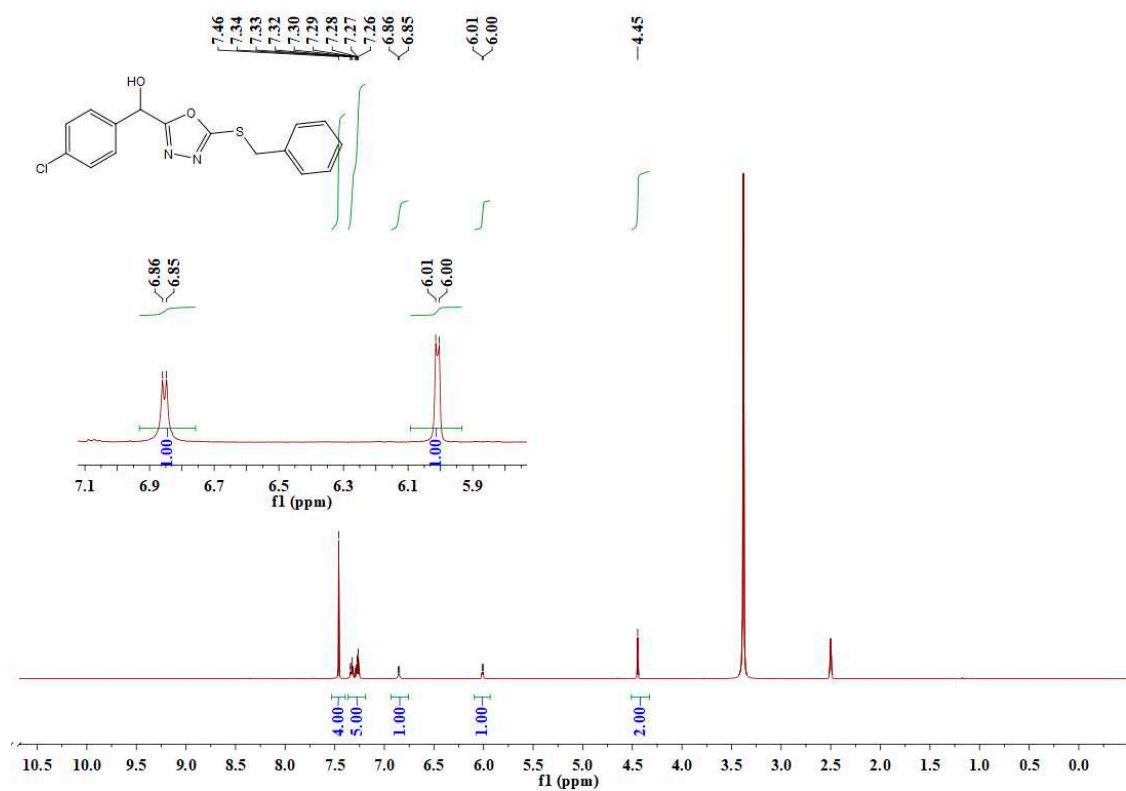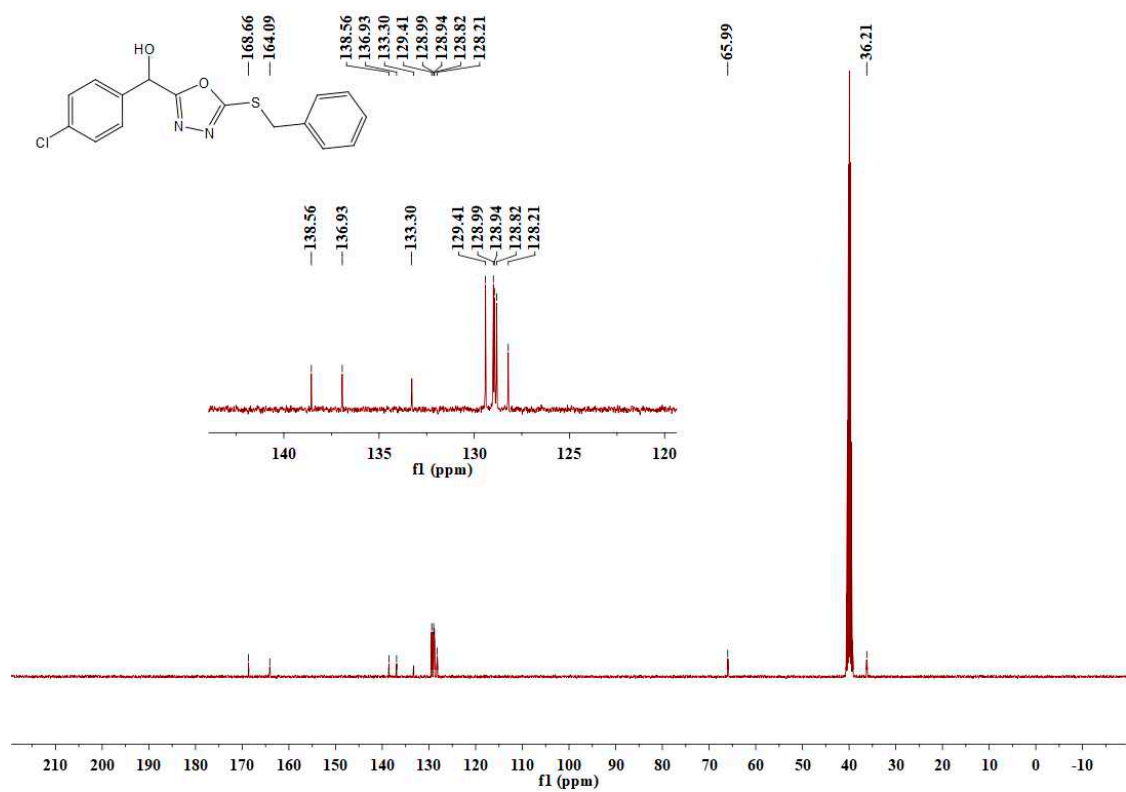

2018121406 #83 RT: 0.84 AV: 1 NL: 4.29E5  
T: FTMS + pESI Full ms [100.0000-1000.0000]

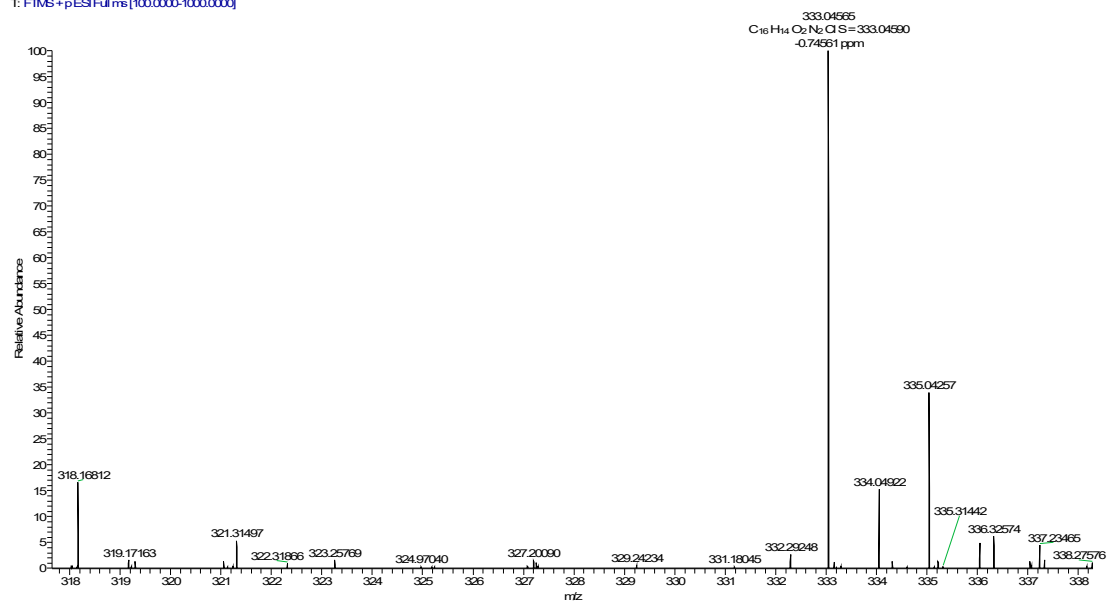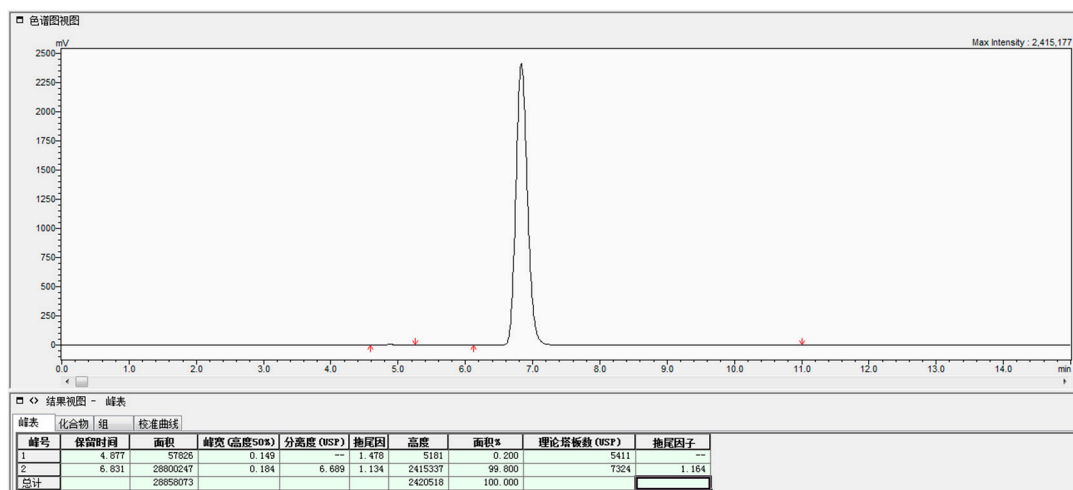

Figure S15.  $^1\text{H}$  NMR,  $^{13}\text{C}$  NMR, HRMS, and HPLC for E15.

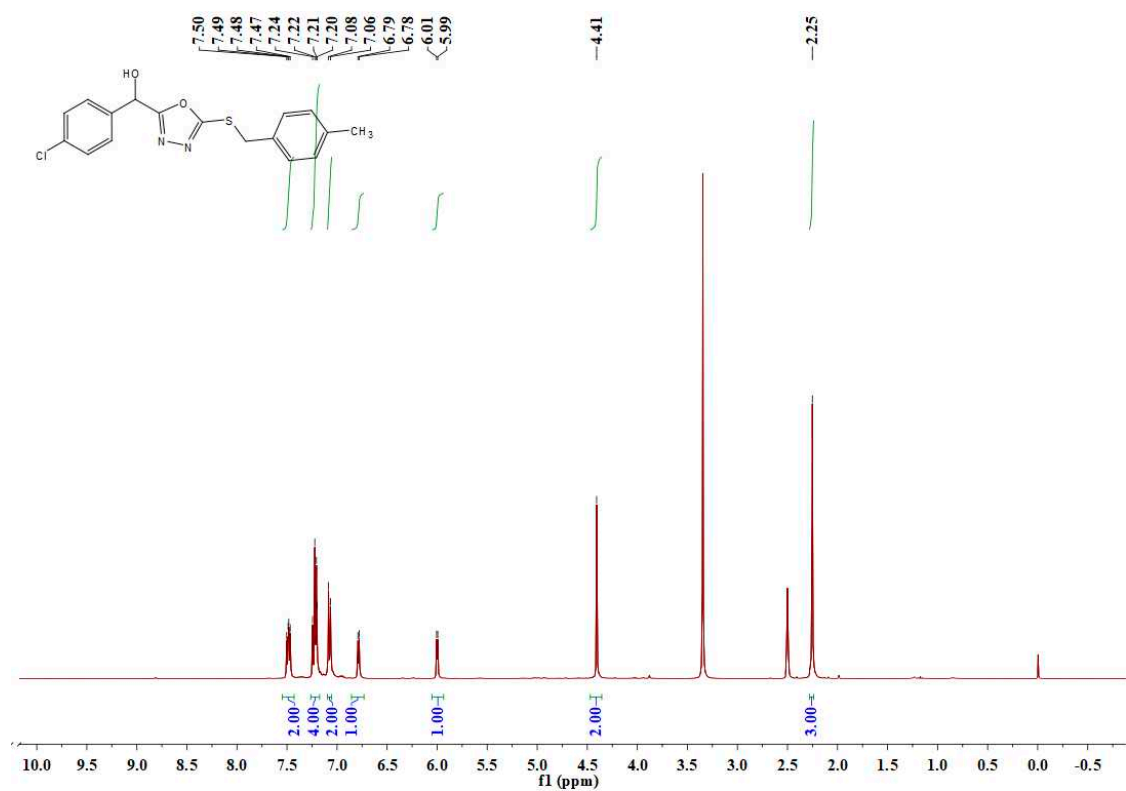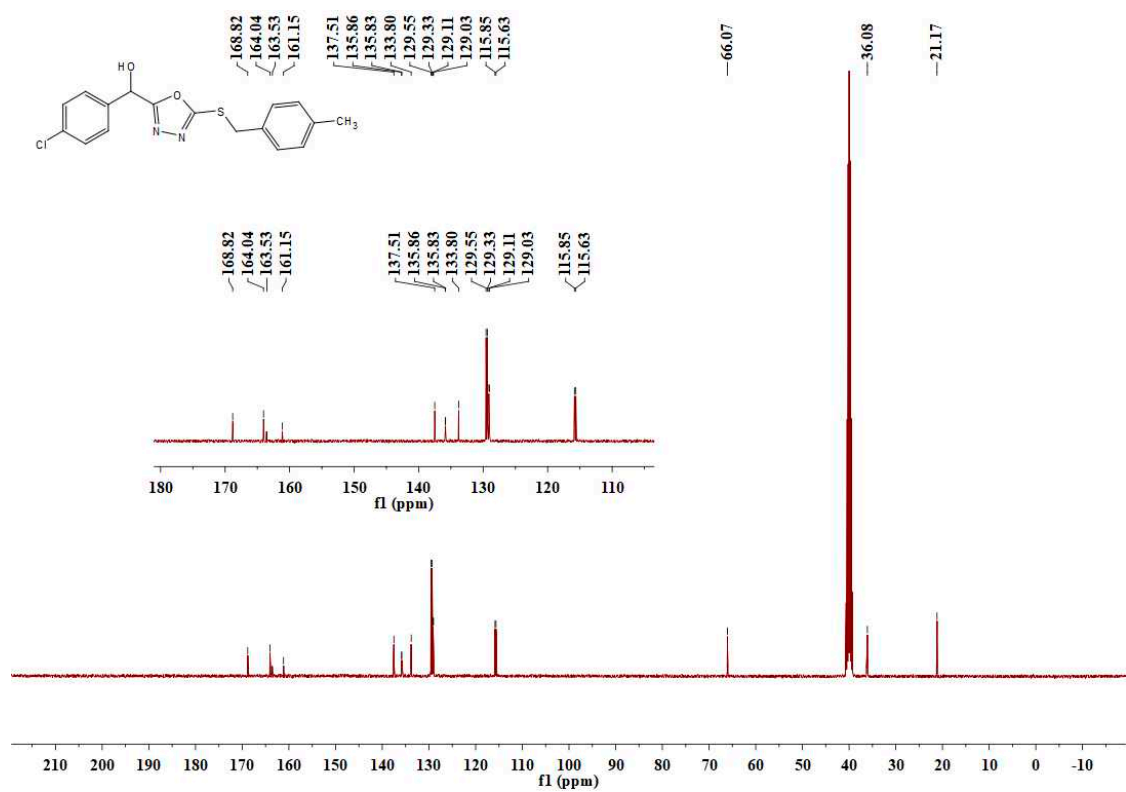

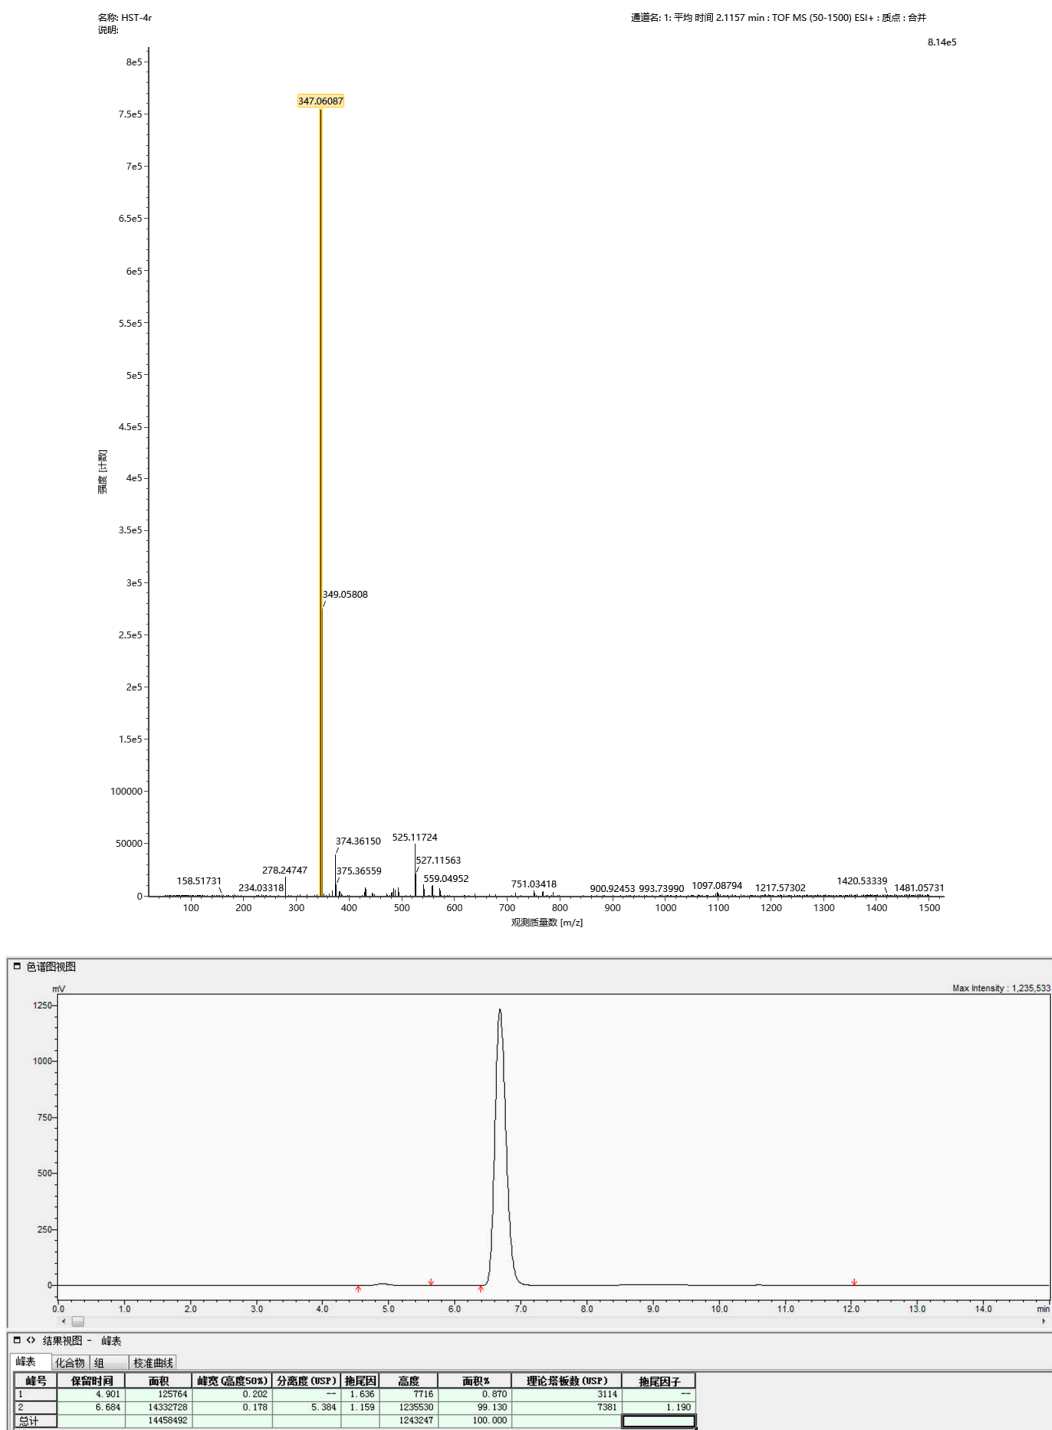

Figure S16.  $^1\text{H}$  NMR,  $^{13}\text{C}$  NMR, HRMS, and HPLC for **E<sub>16</sub>**.

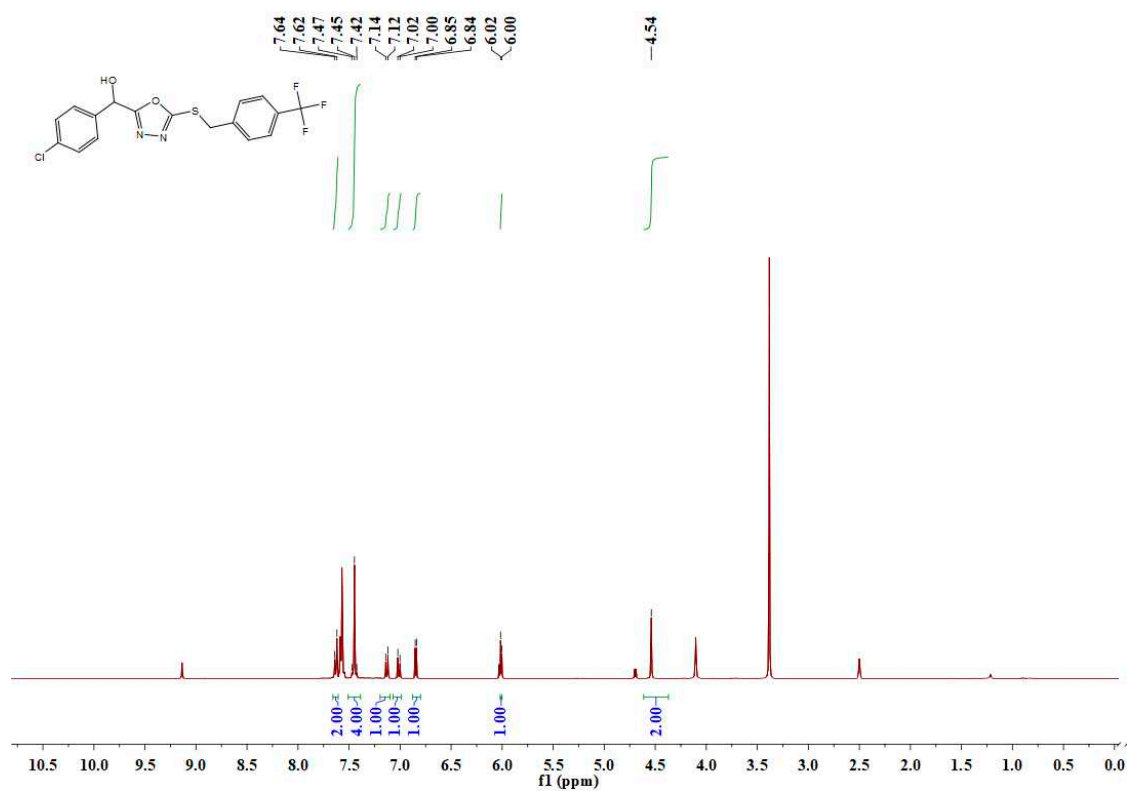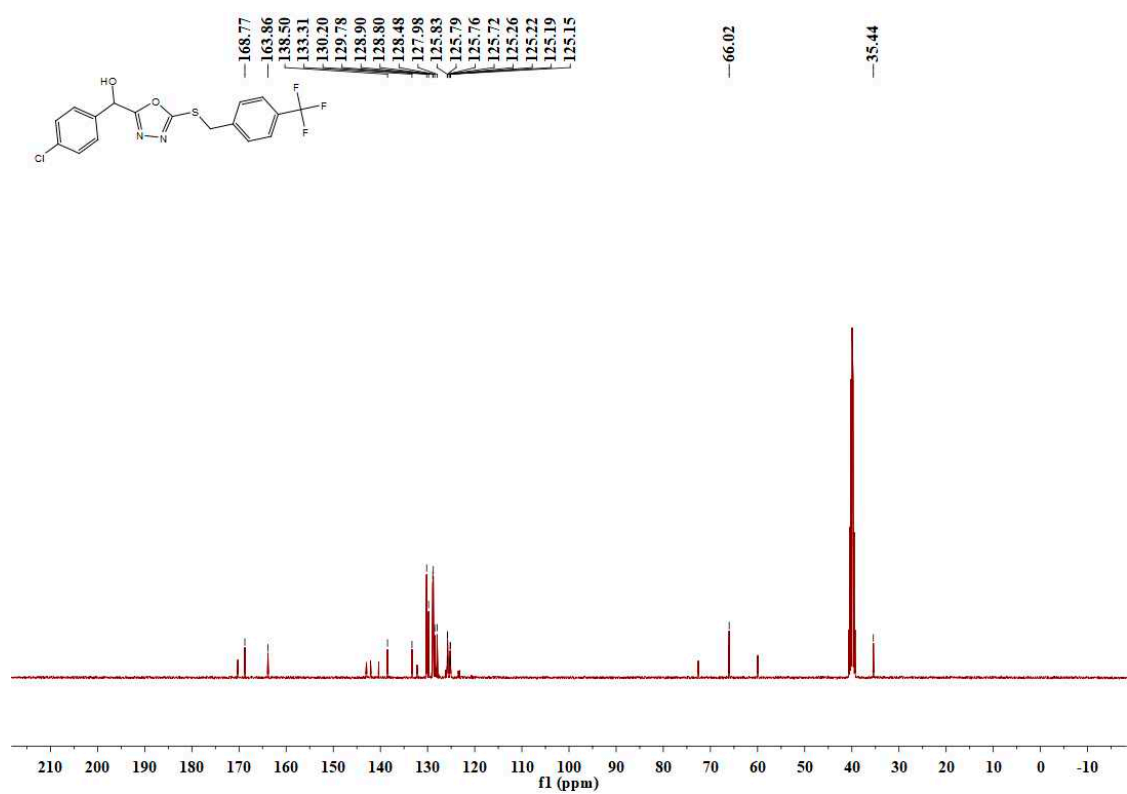

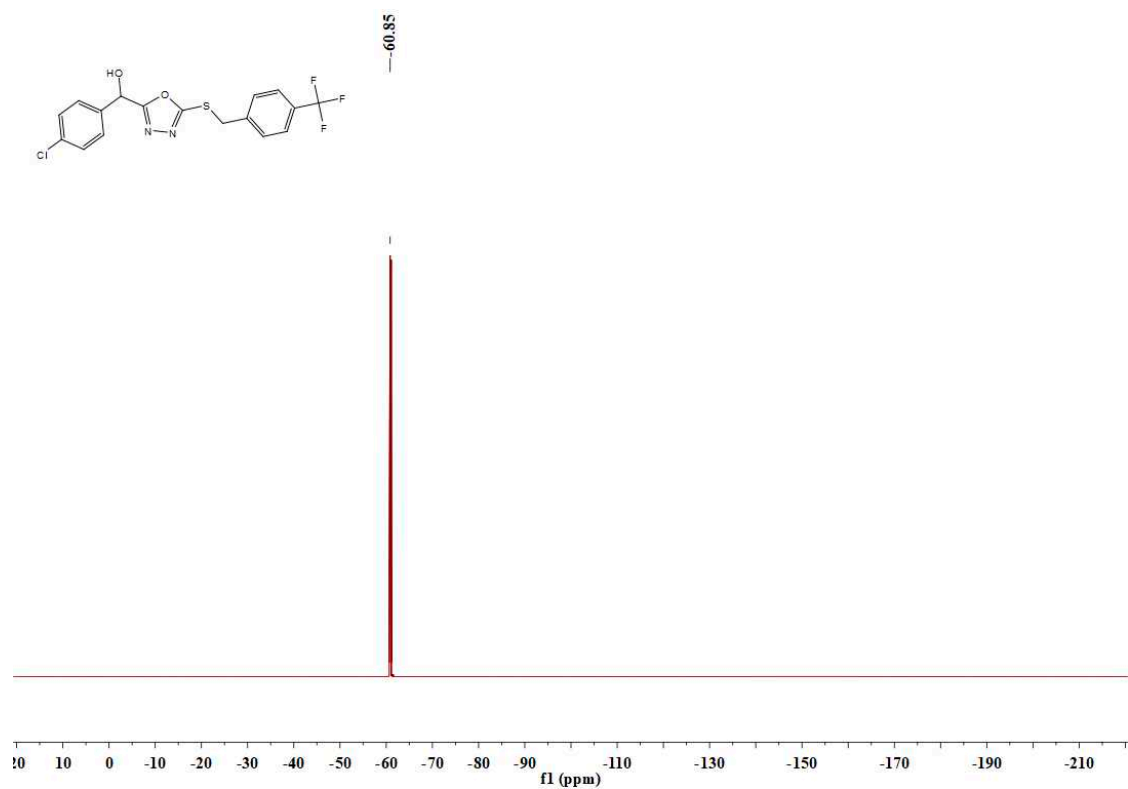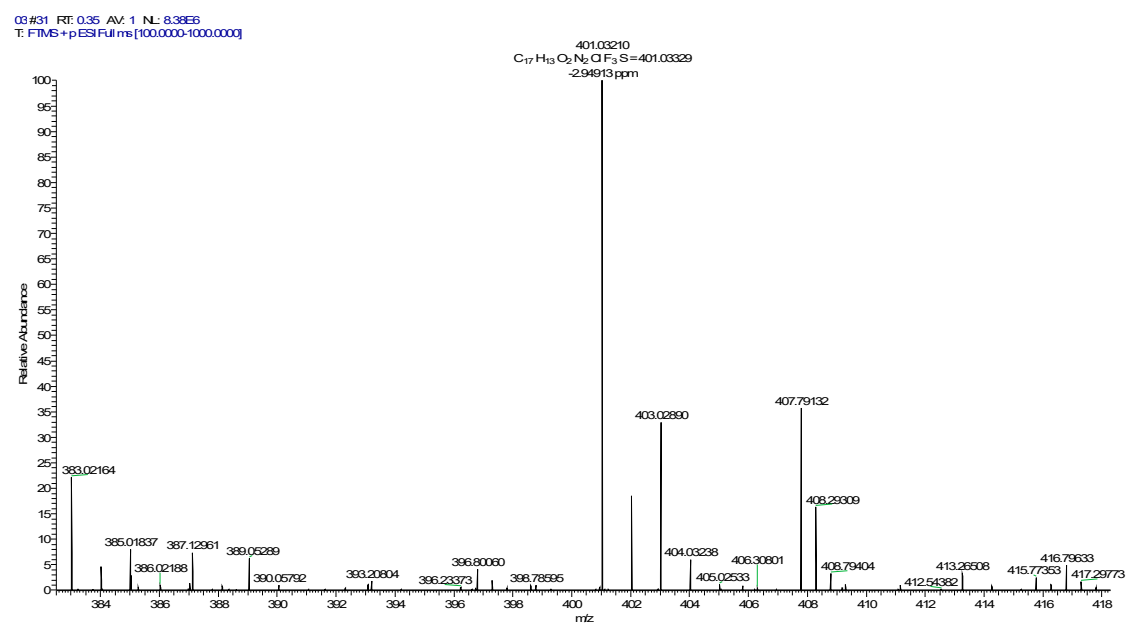

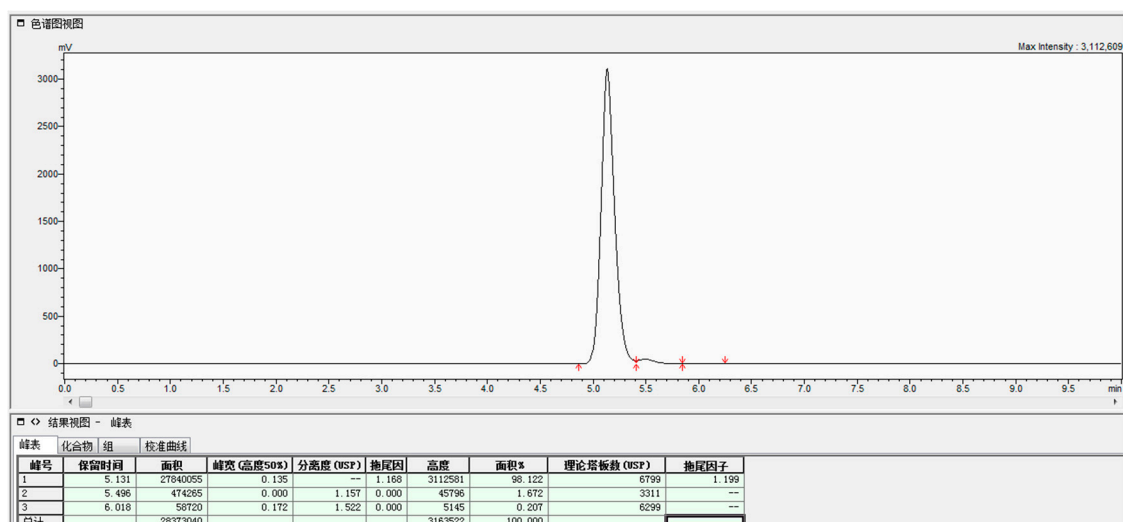

Figure S17.  $^1\text{H}$  NMR,  $^{13}\text{C}$  NMR,  $^{19}\text{F}$  NMR, HRMS and HPLC for **E17**.

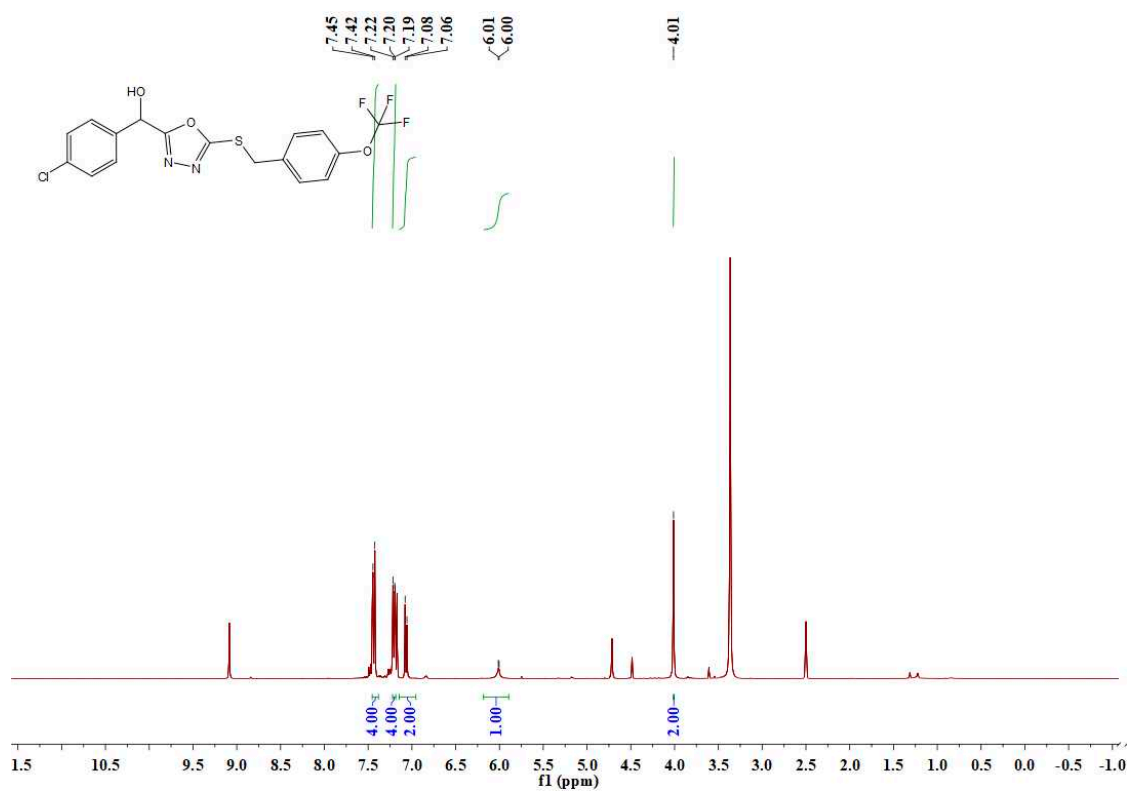

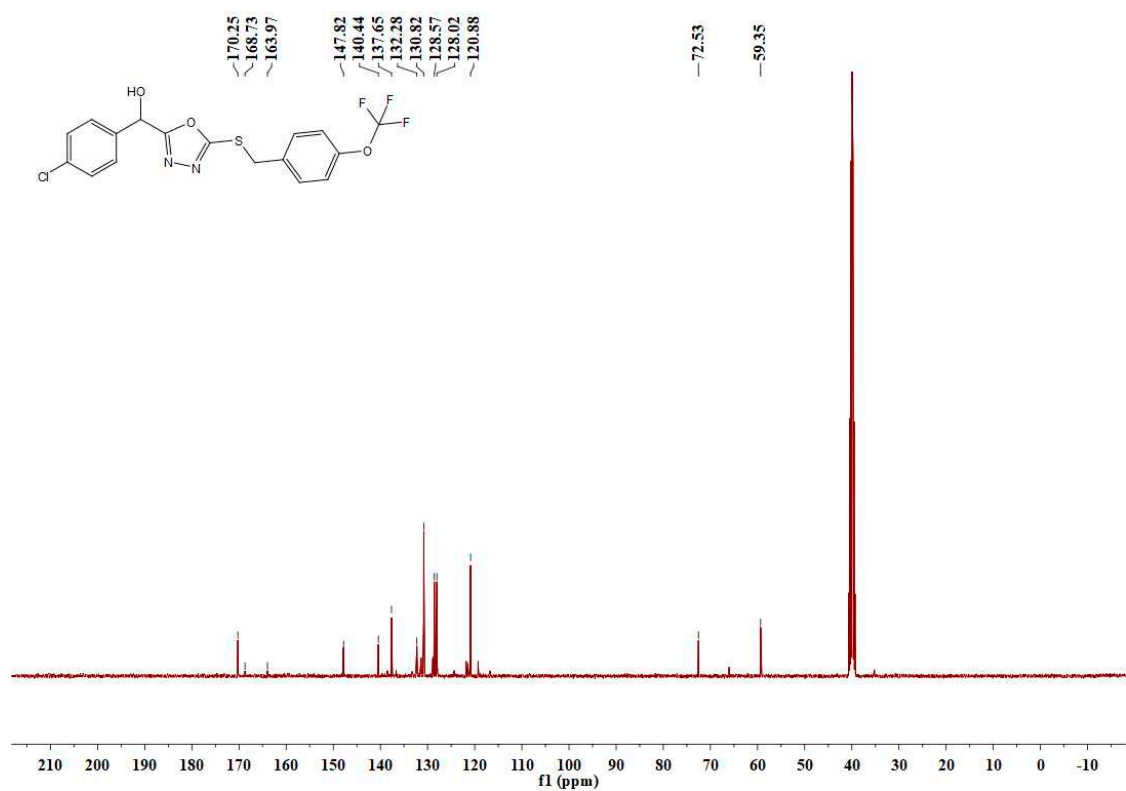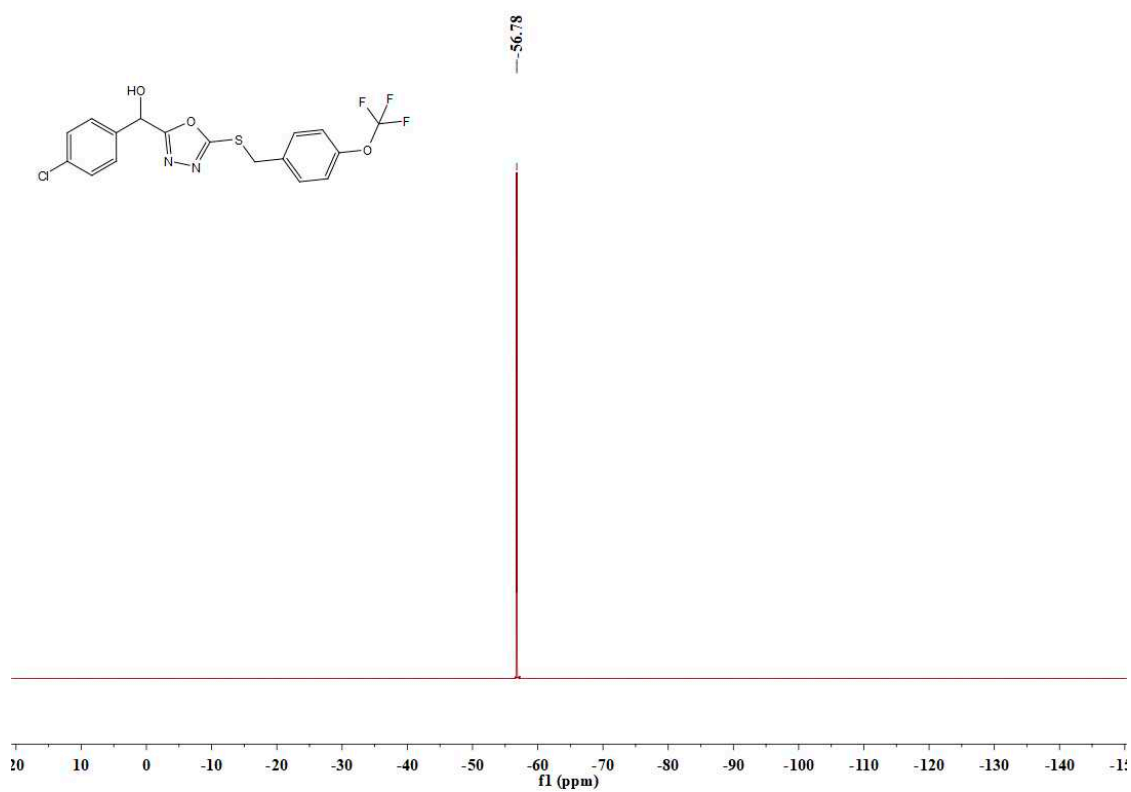



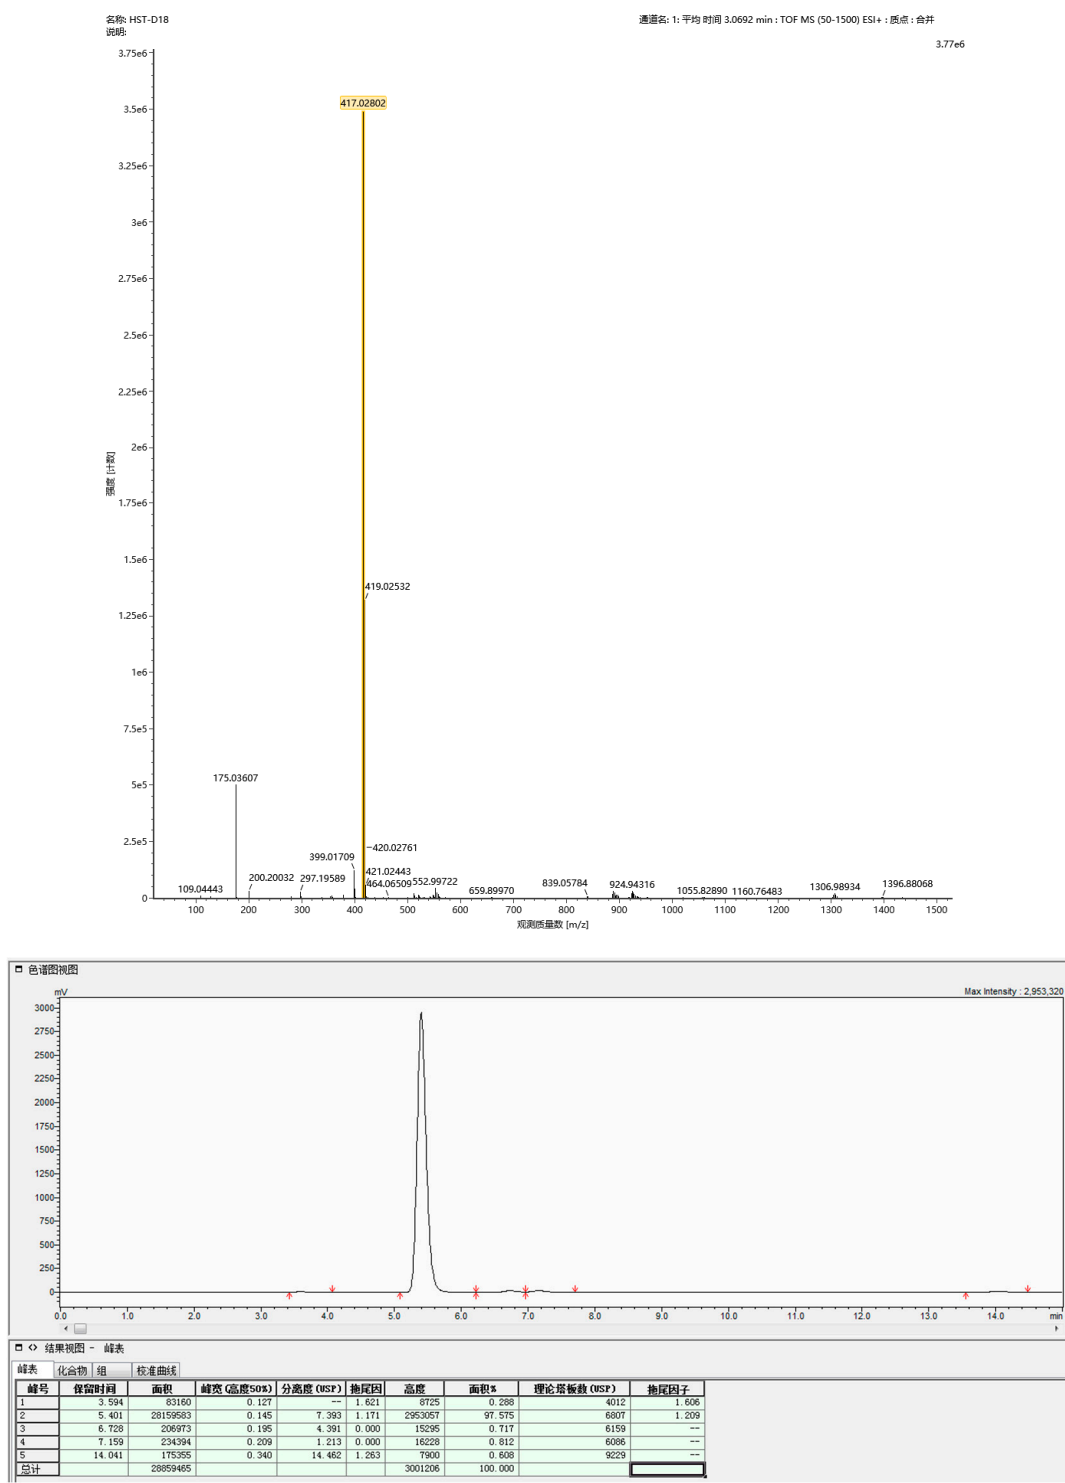

Figure S18. <sup>1</sup>H NMR, <sup>13</sup>C NMR, <sup>19</sup>F NMR, HRMS and HPLC for E<sub>18</sub>.

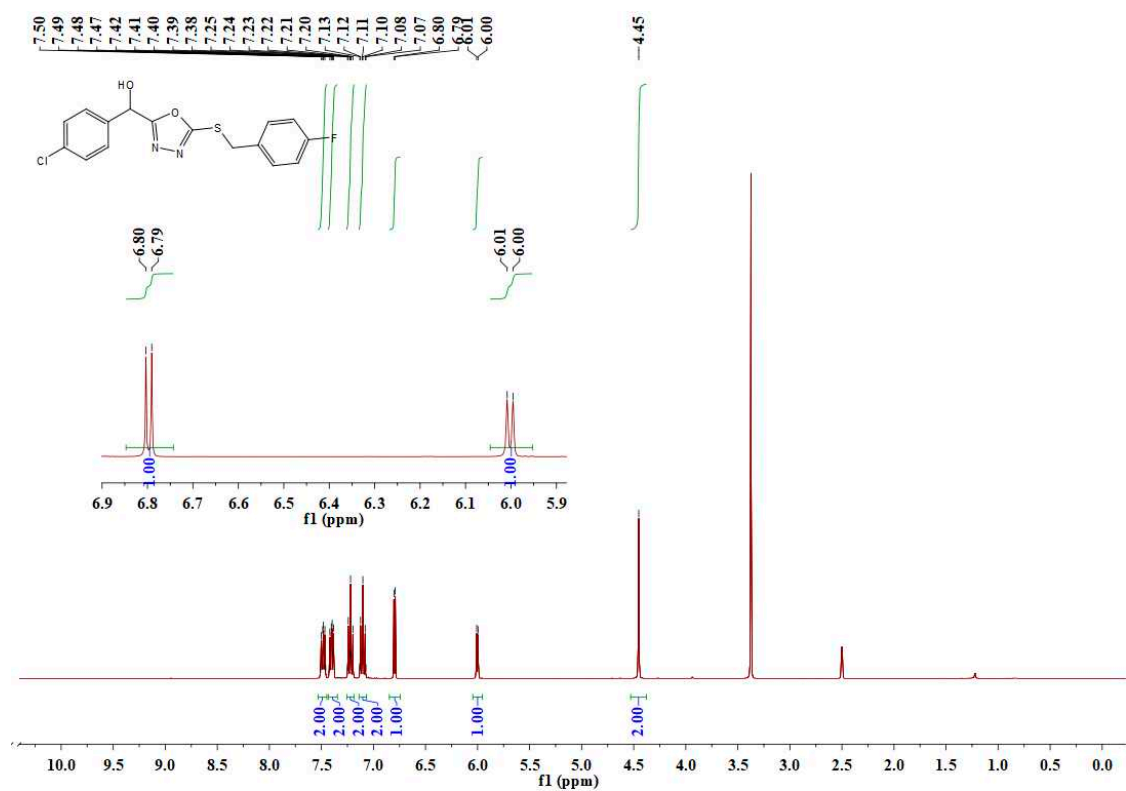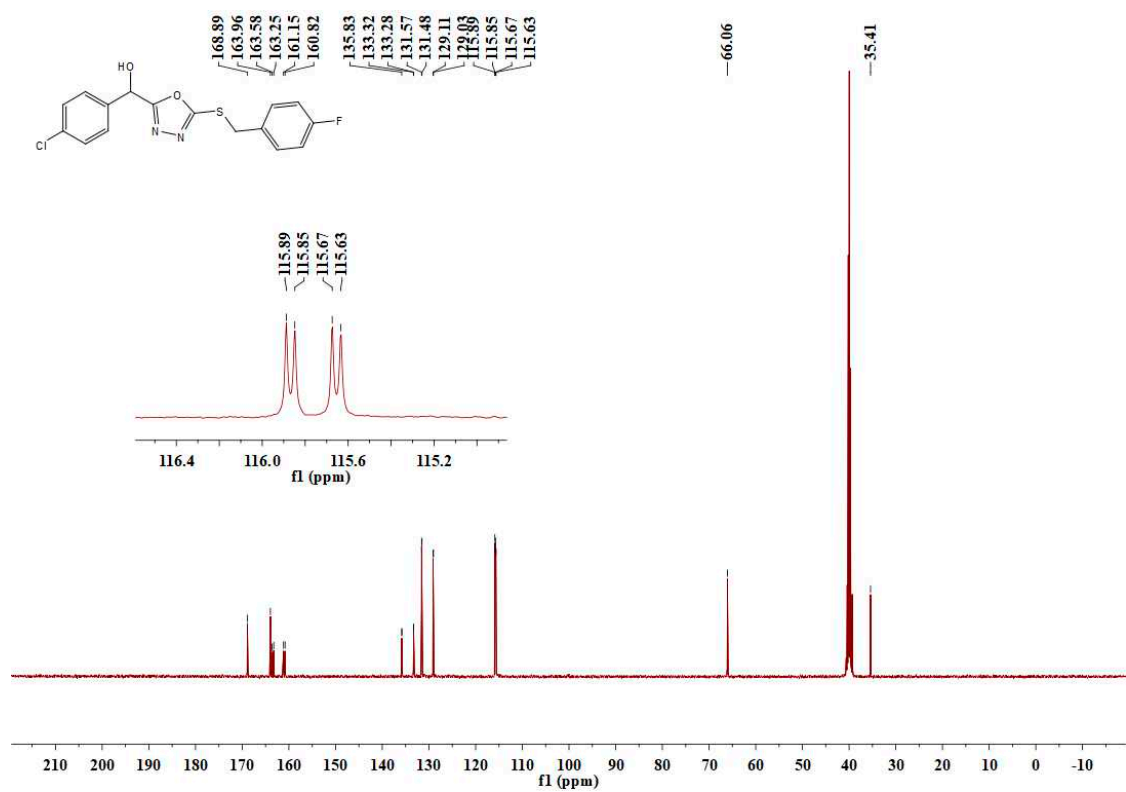

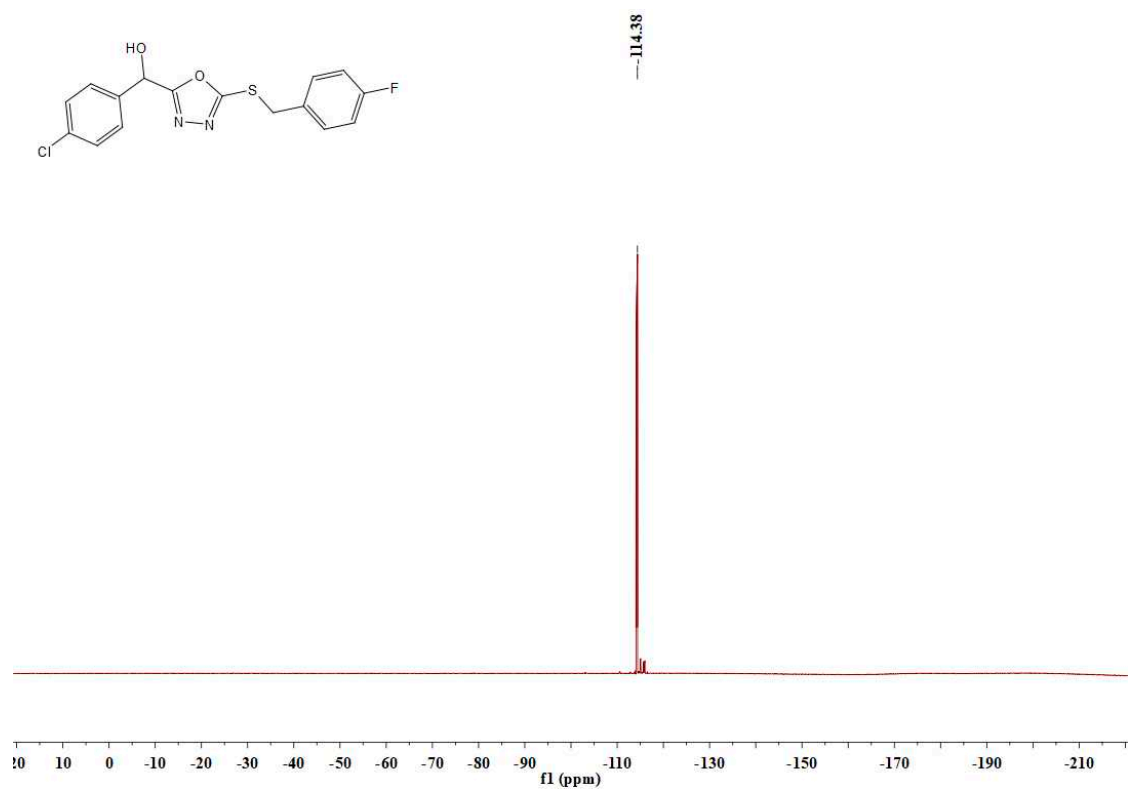

24 #39 RT: 0.39 AV: 1 NL: 8.22E7

T: FTMS + p ESI Full ms [100.0000-1000.0000]

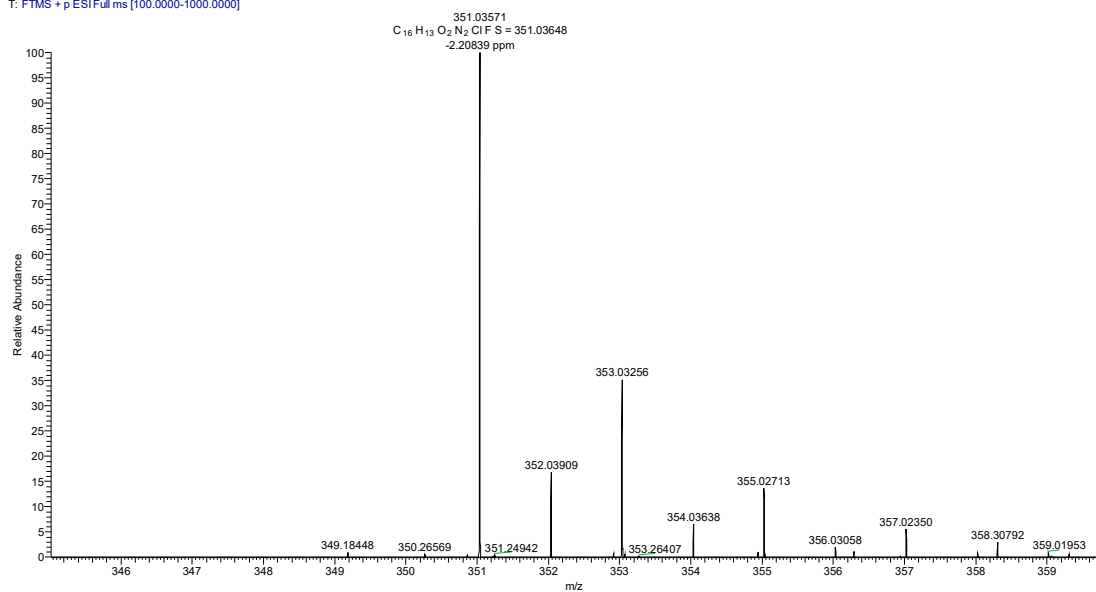

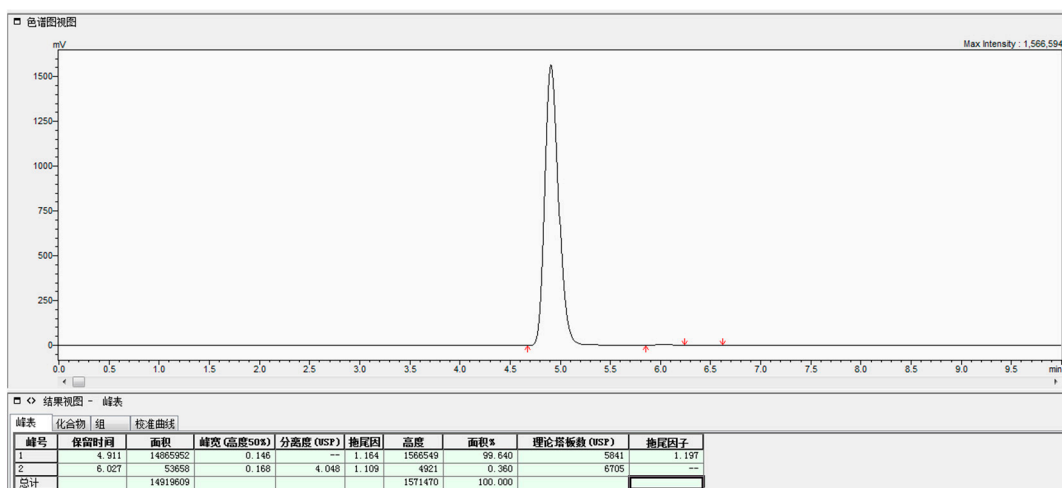

Figure S19.  $^1\text{H}$  NMR,  $^{13}\text{C}$  NMR,  $^{19}\text{F}$  NMR, HRMS and HPLC for **E**<sub>19</sub>.

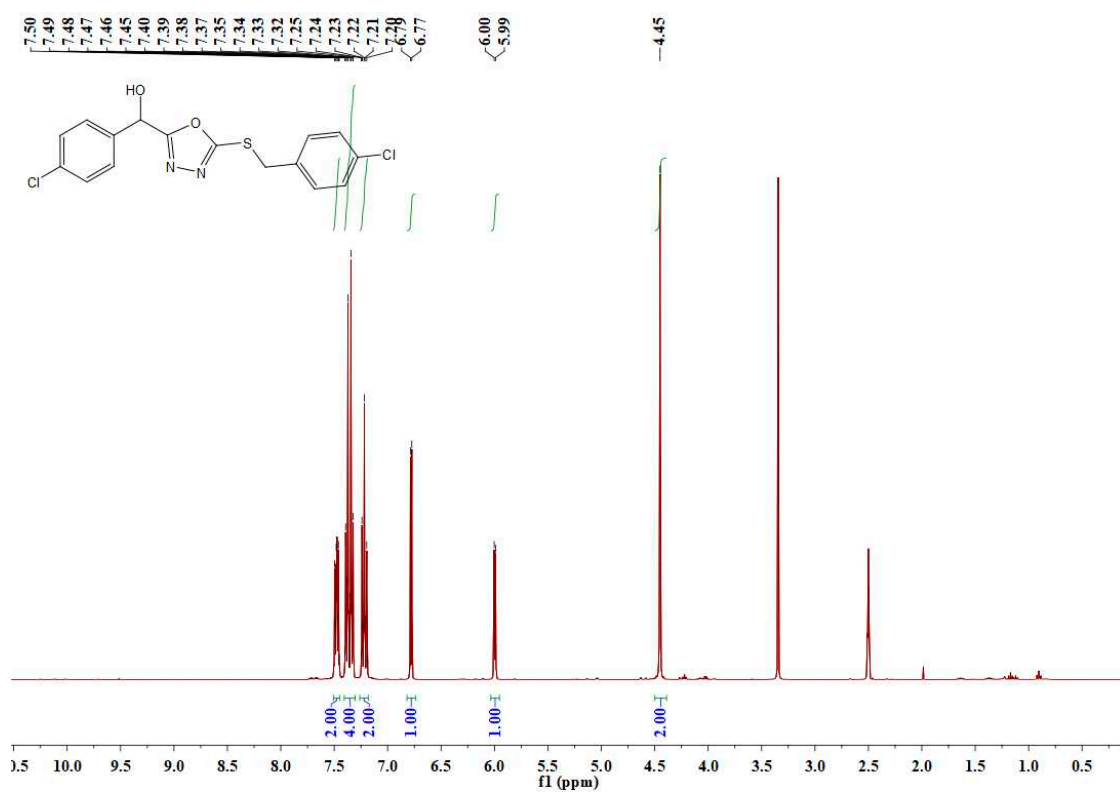

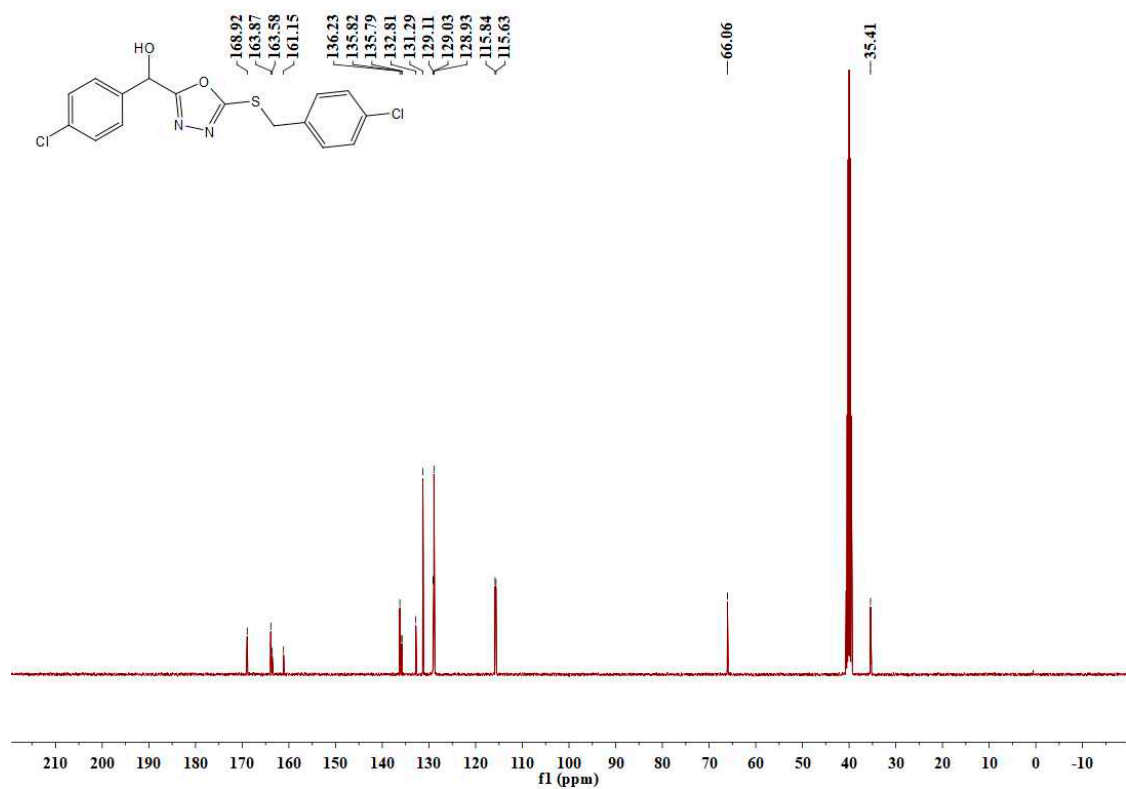

25 #35 RT: 0.35 AV: 1 NL: 8.79E6

T: FTMS + p ESIFull ms [100.0000-1000.0000]

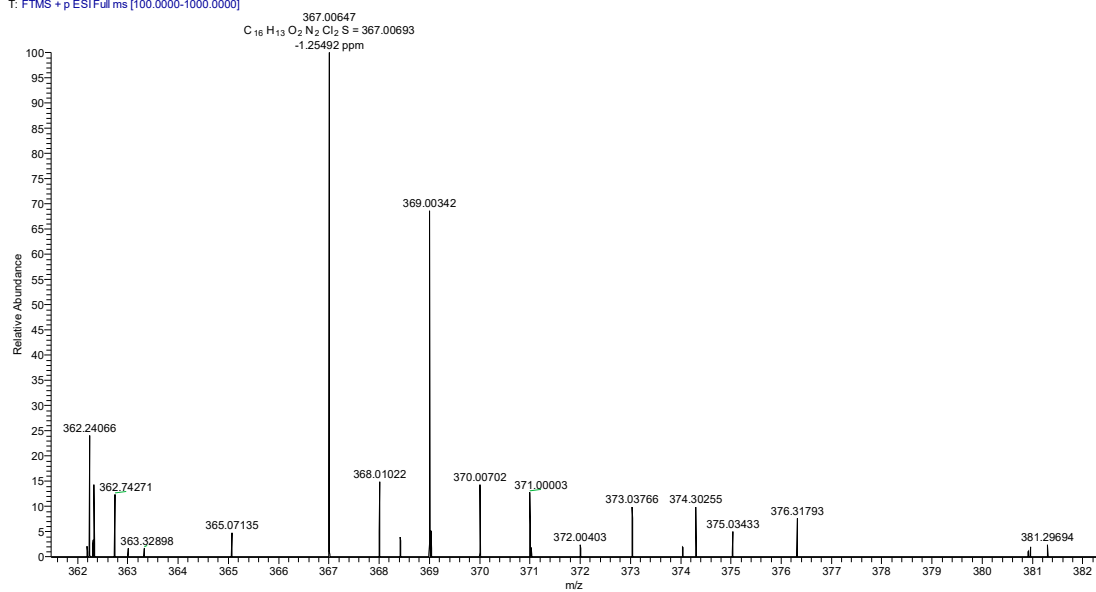

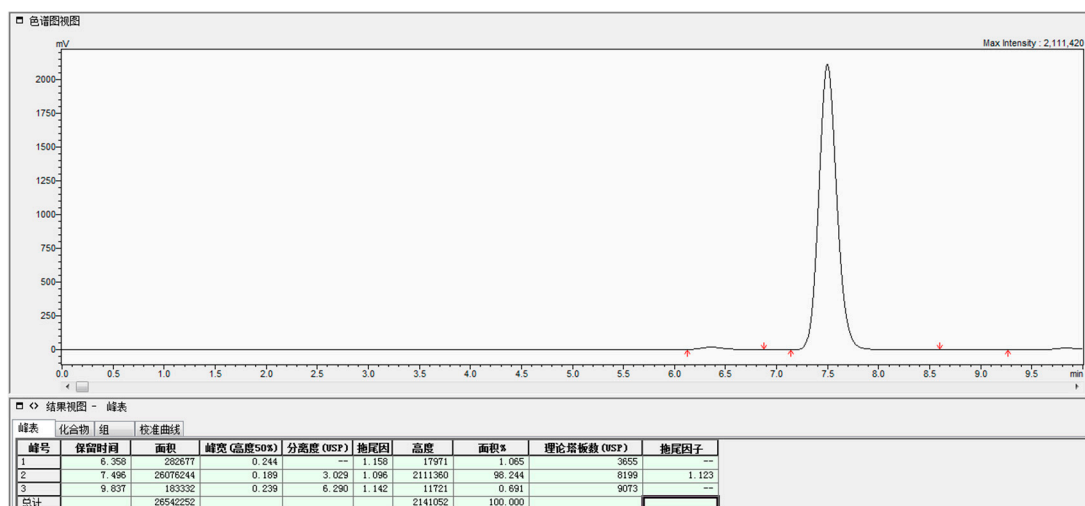

Figure S20.  $^1\text{H}$  NMR,  $^{13}\text{C}$  NMR, HRMS, and HPLC for **E20**.

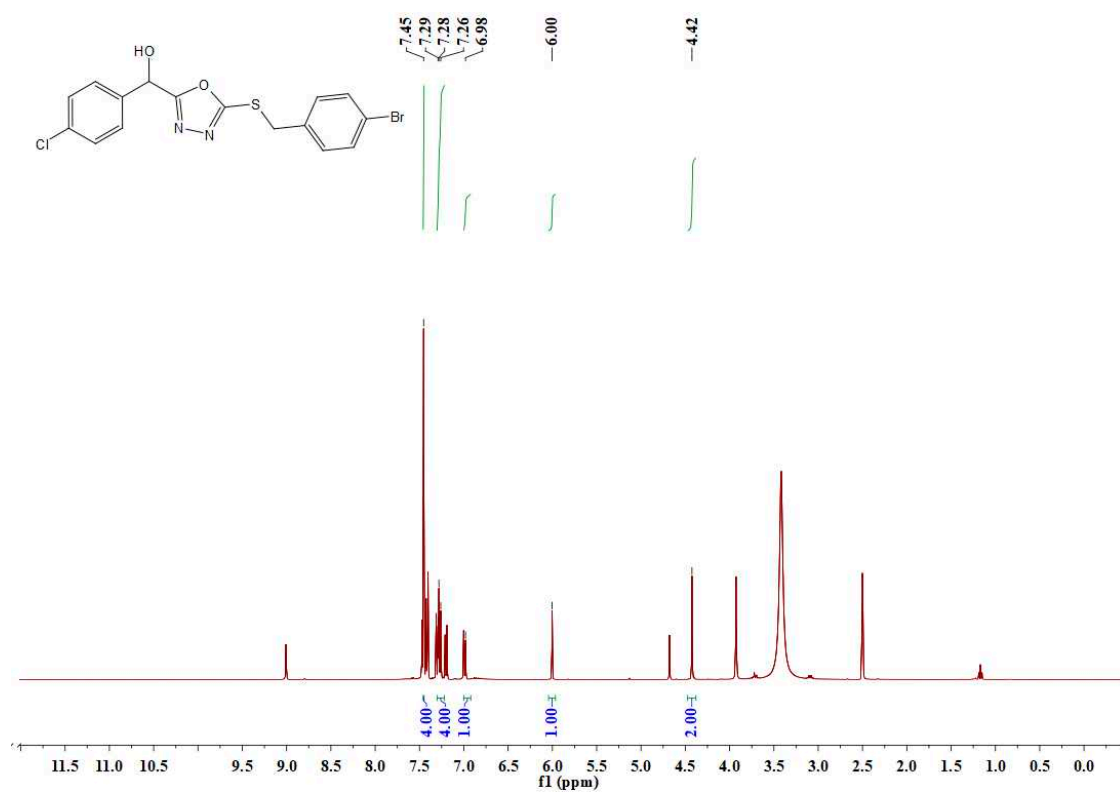

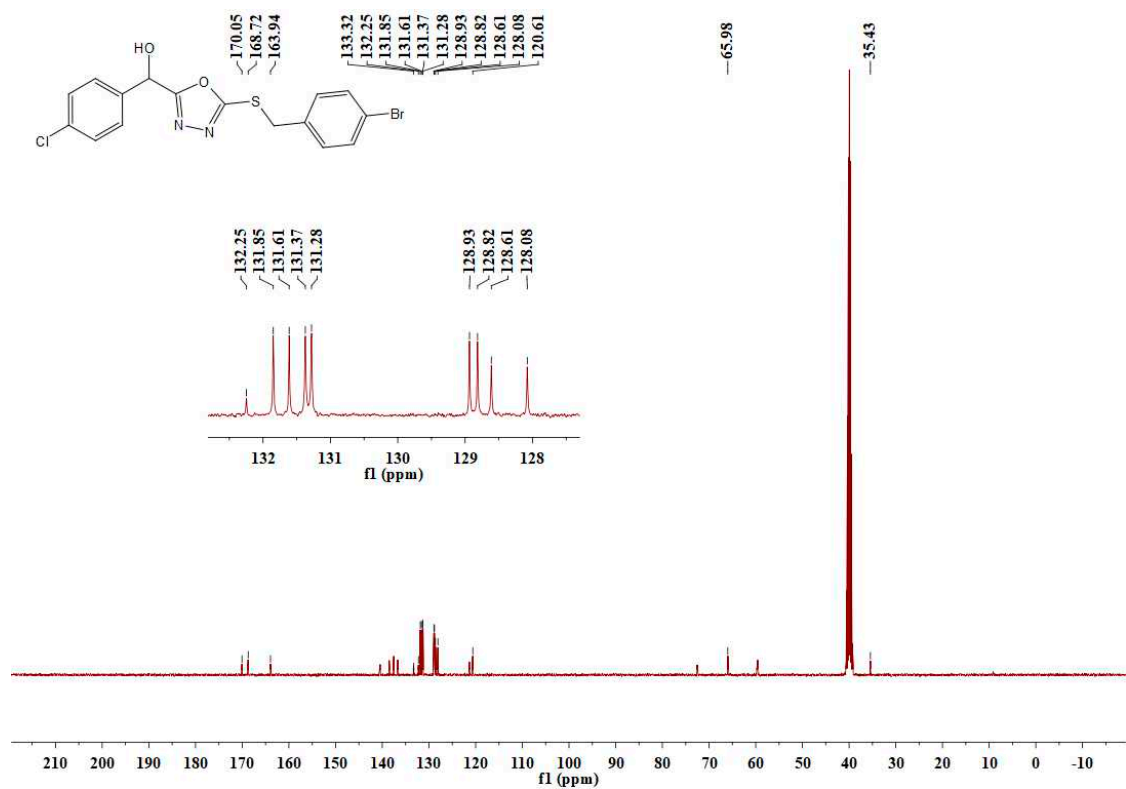

名称: HST-4w  
说明:

通道名: 1; 平均时间: 3.1247 min; TOF MS (50-1500) ESI+; 质点: 合并

1.76e7

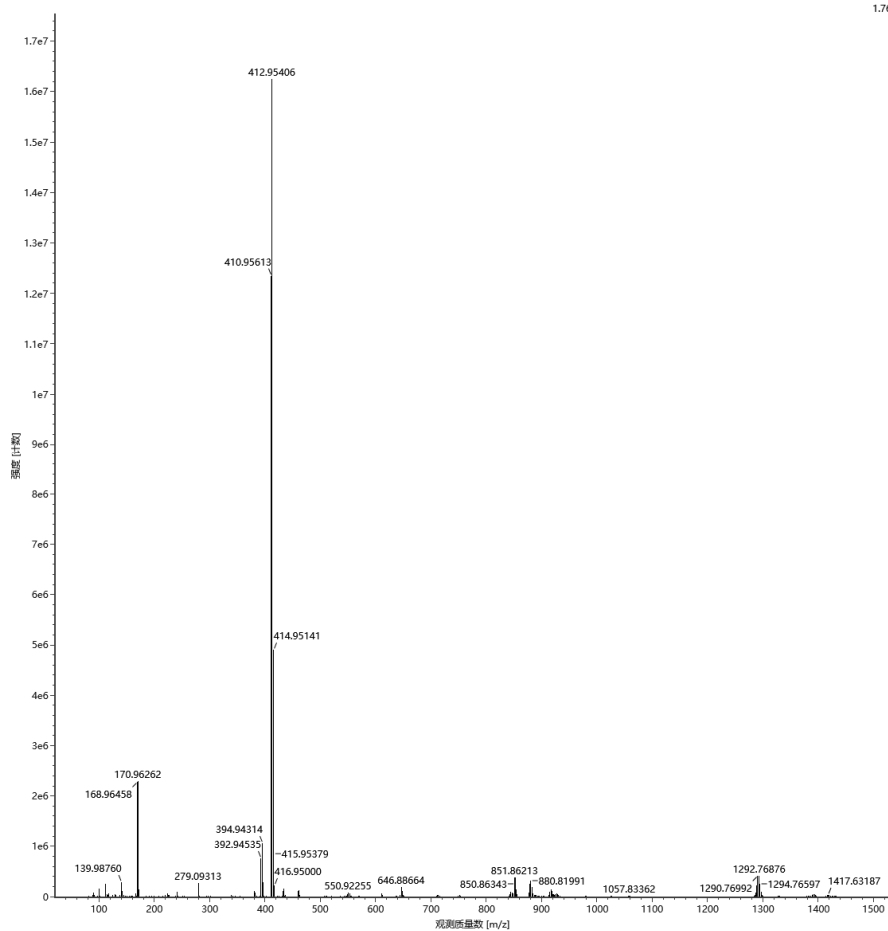

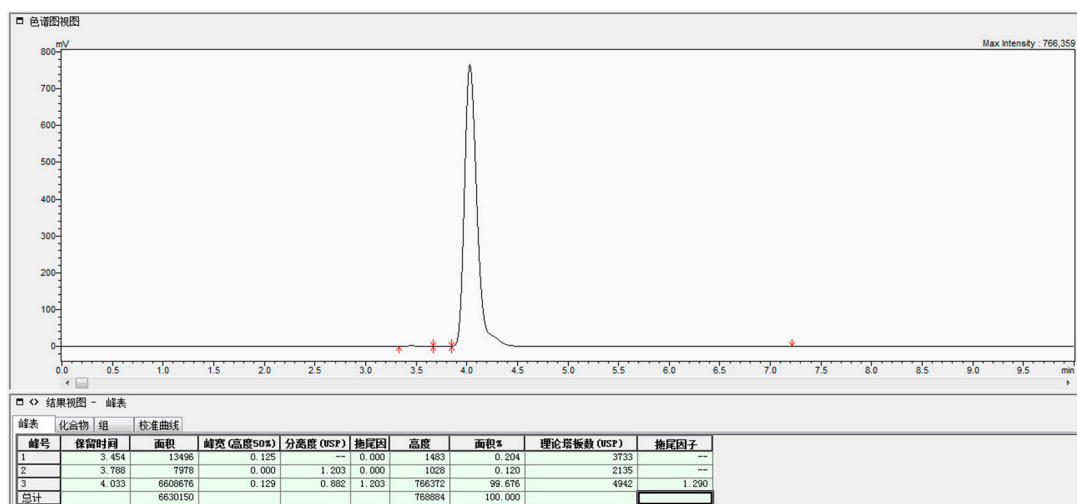

Figure S21.  $^1\text{H}$  NMR,  $^{13}\text{C}$  NMR, HRMS, and HPLC for  $\text{E}_{21}$ .

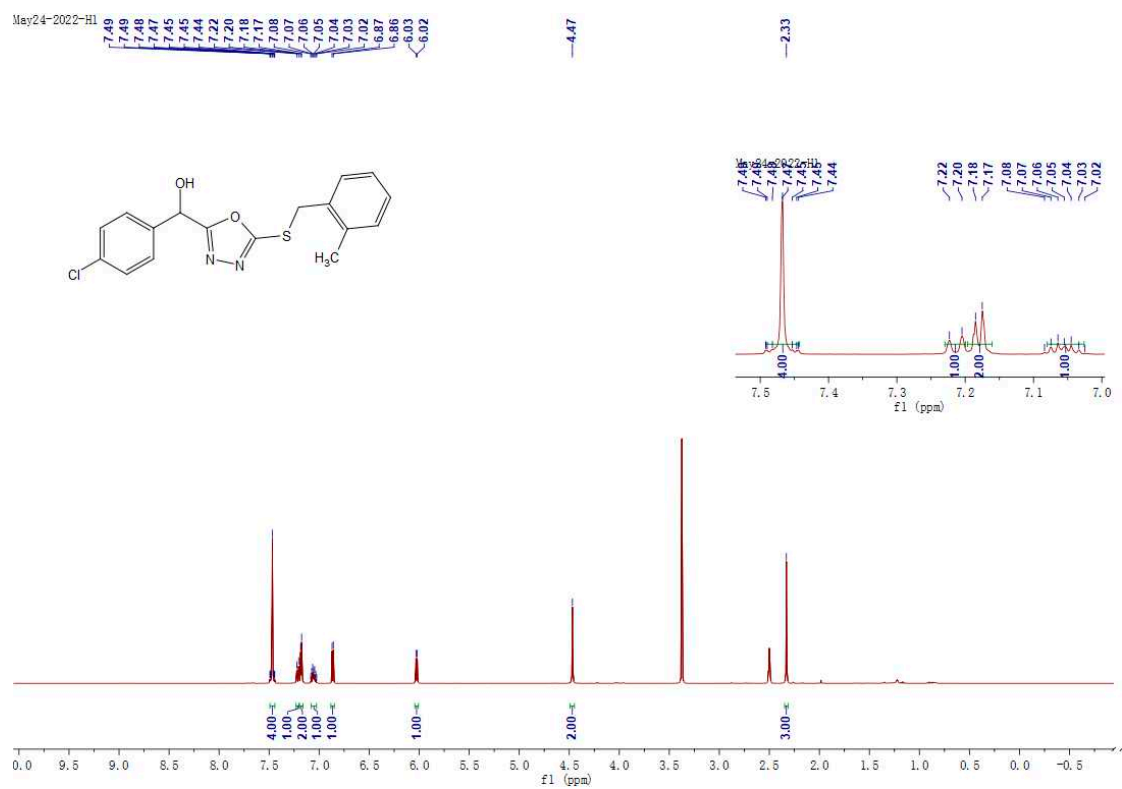



May24-2022-H1

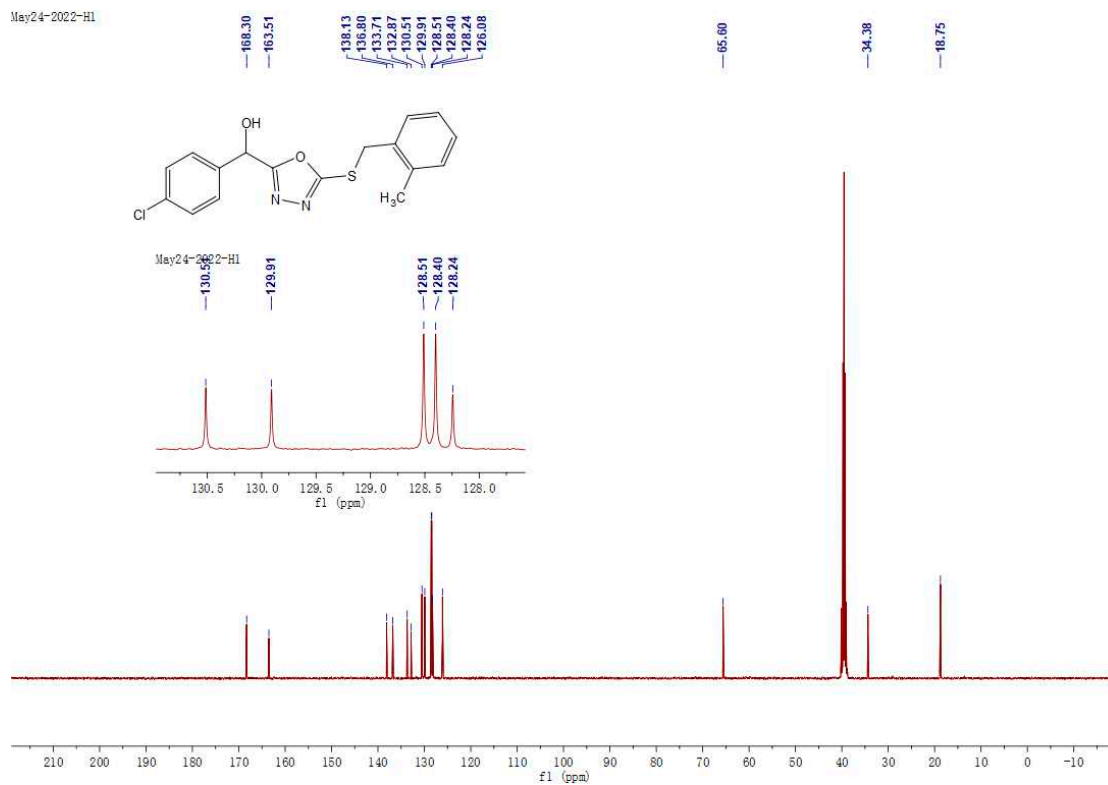

43 #37 RT: 0.37 AV: 1 NL: 6.19E+008  
T: FTMS + p ESI Full ms [150.0000-2200.0000]

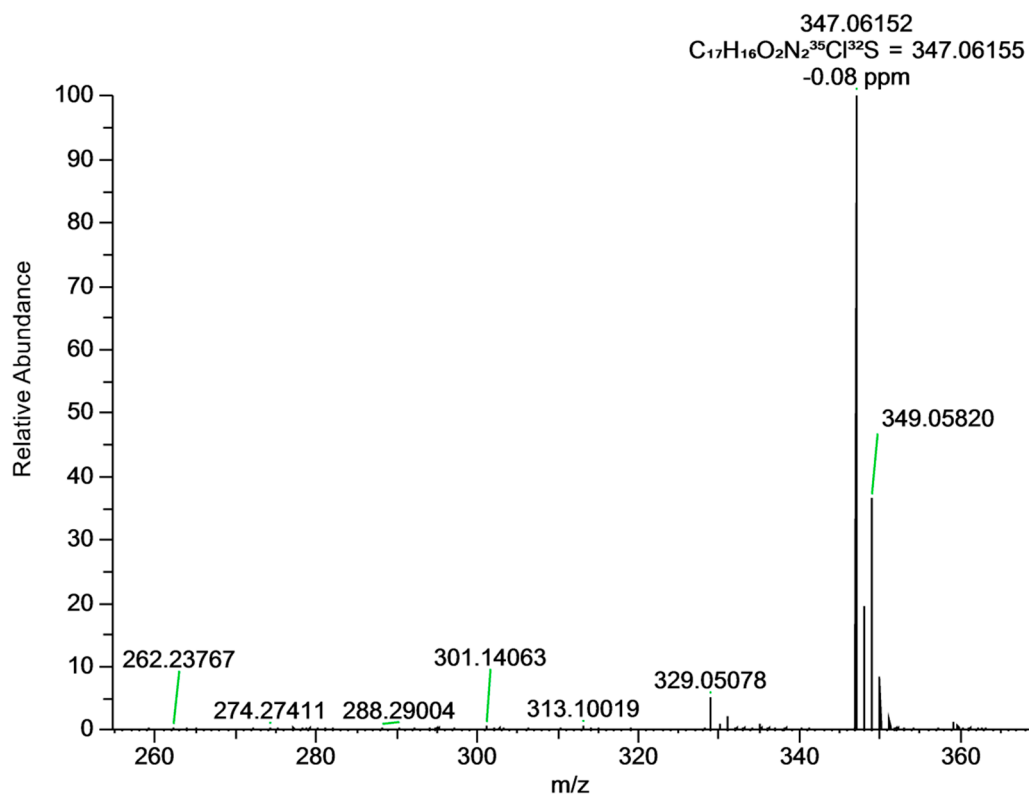

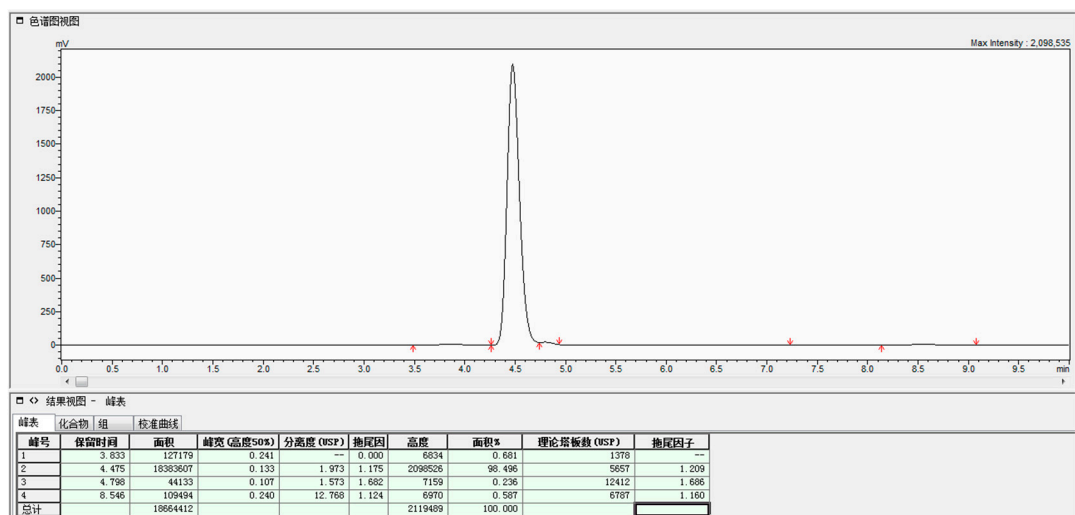

Figure S22.  $^1\text{H}$  NMR,  $^{13}\text{C}$  NMR, HRMS, and HPLC for E22.

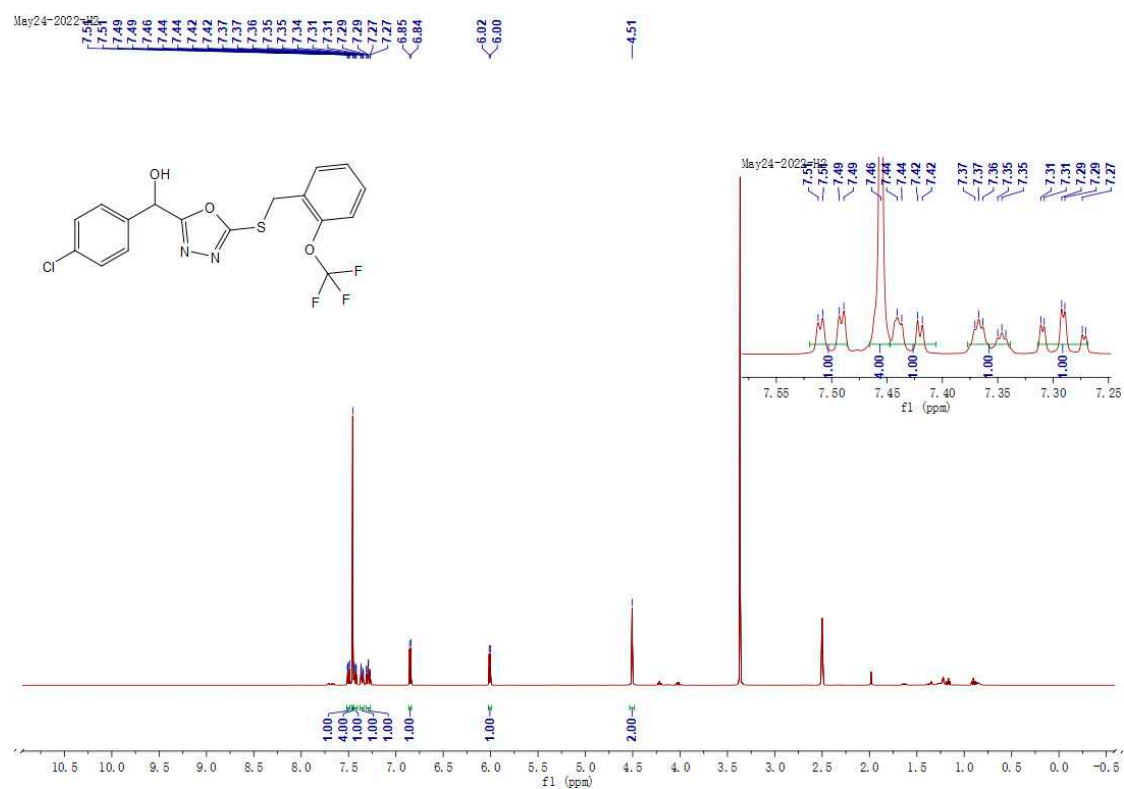

May24-2022-H2

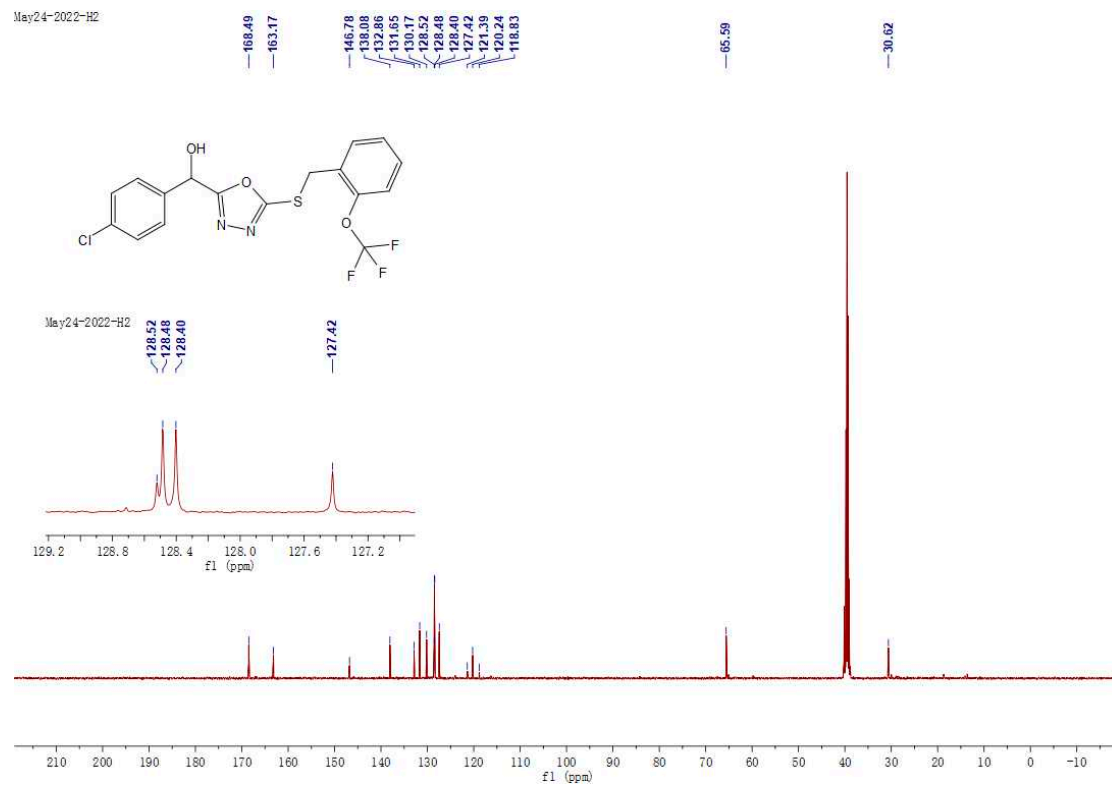

May24-2022-H2

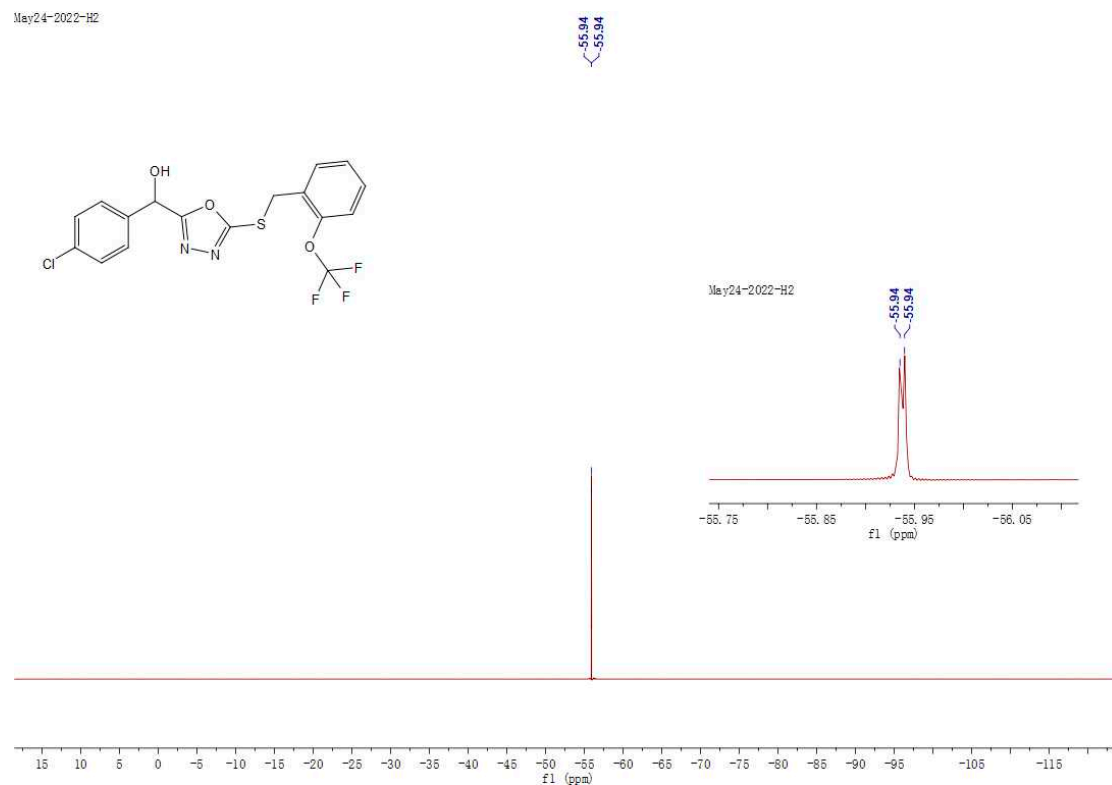

44 #43 RT: 0.43 AV: 1 NL: 7.29E+008  
T: FTMS + p ESI Full ms [150.0000-2200.0000]

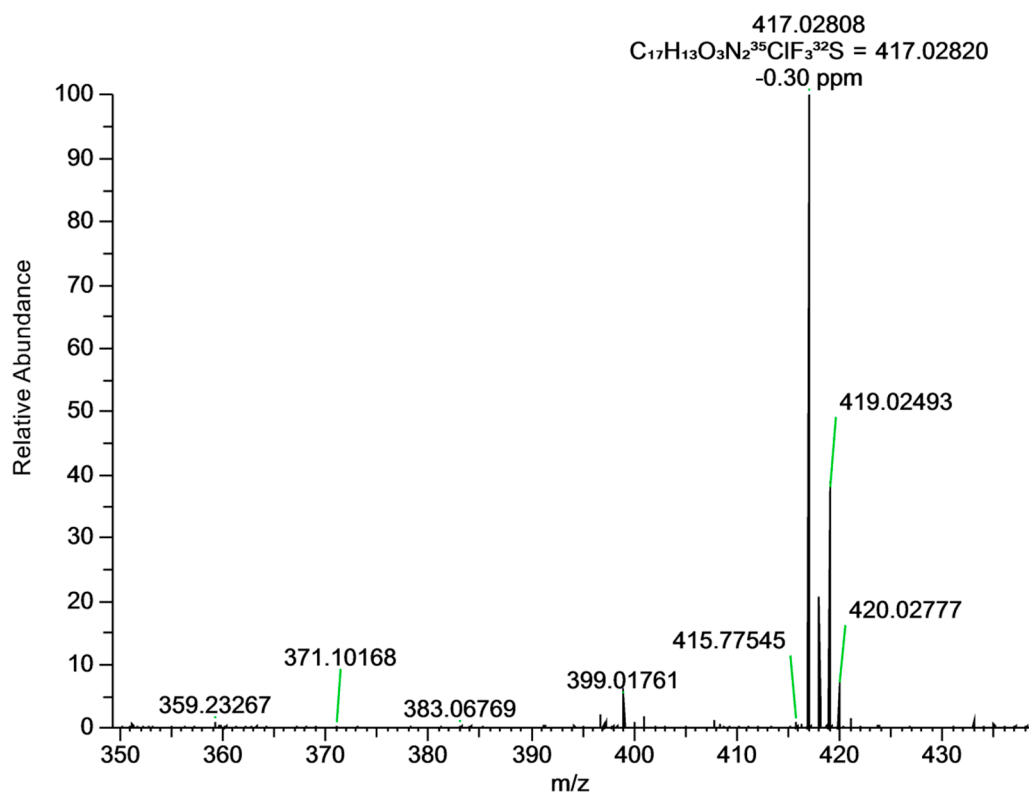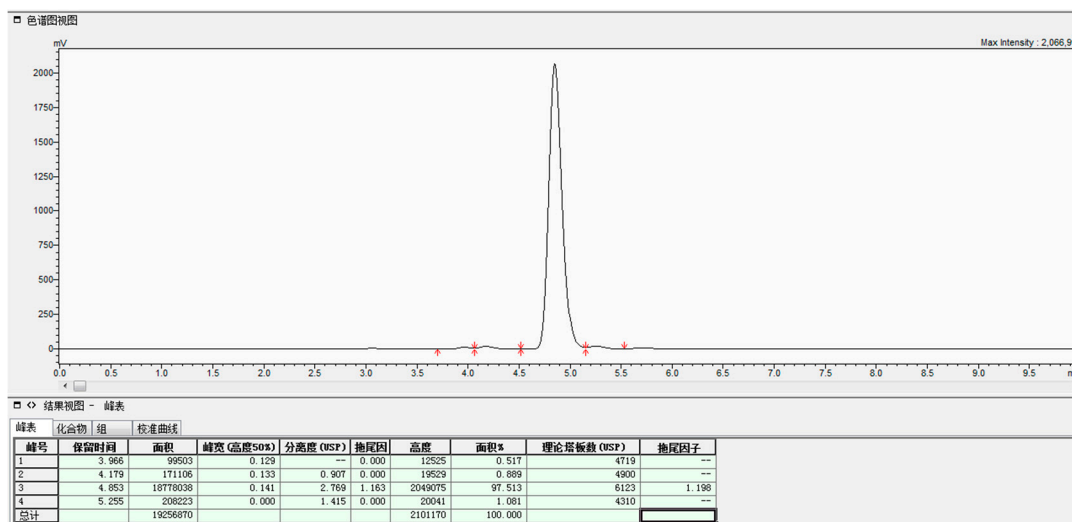

Figure S23.  $^1H$  NMR,  $^{13}C$  NMR,  $^{19}F$  NMR, HRMS and HPLC for **E**<sub>23</sub>.

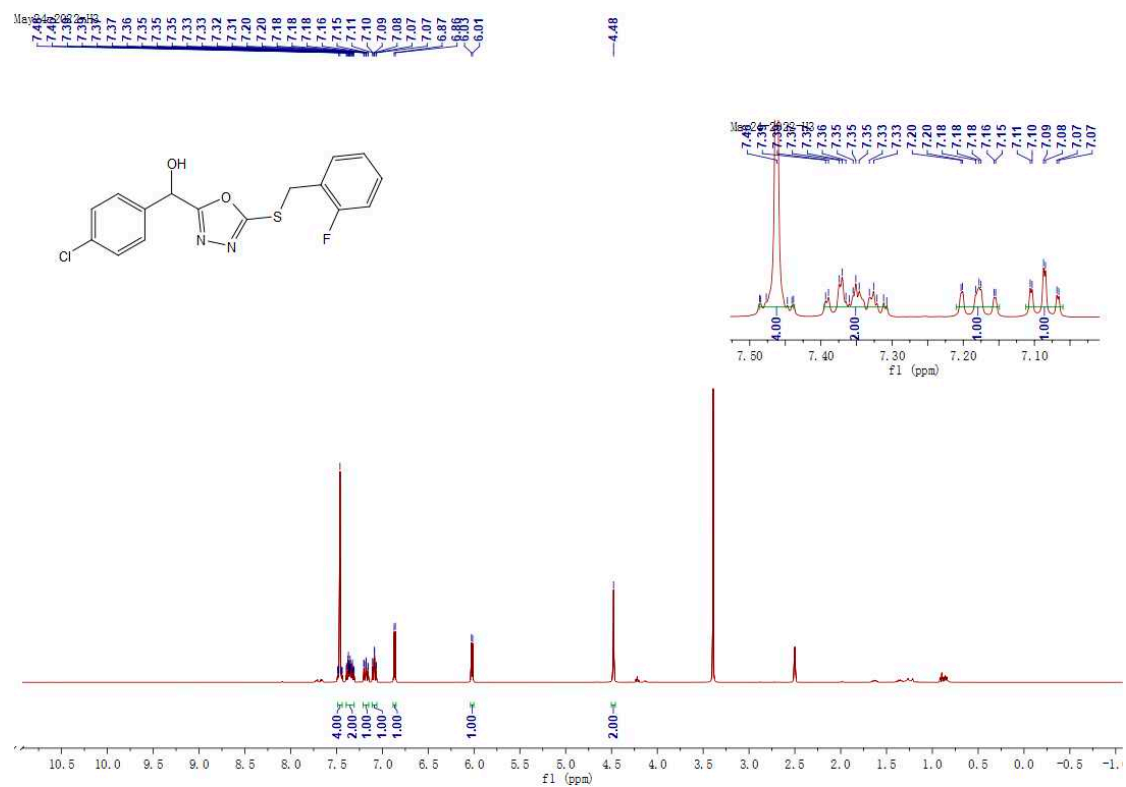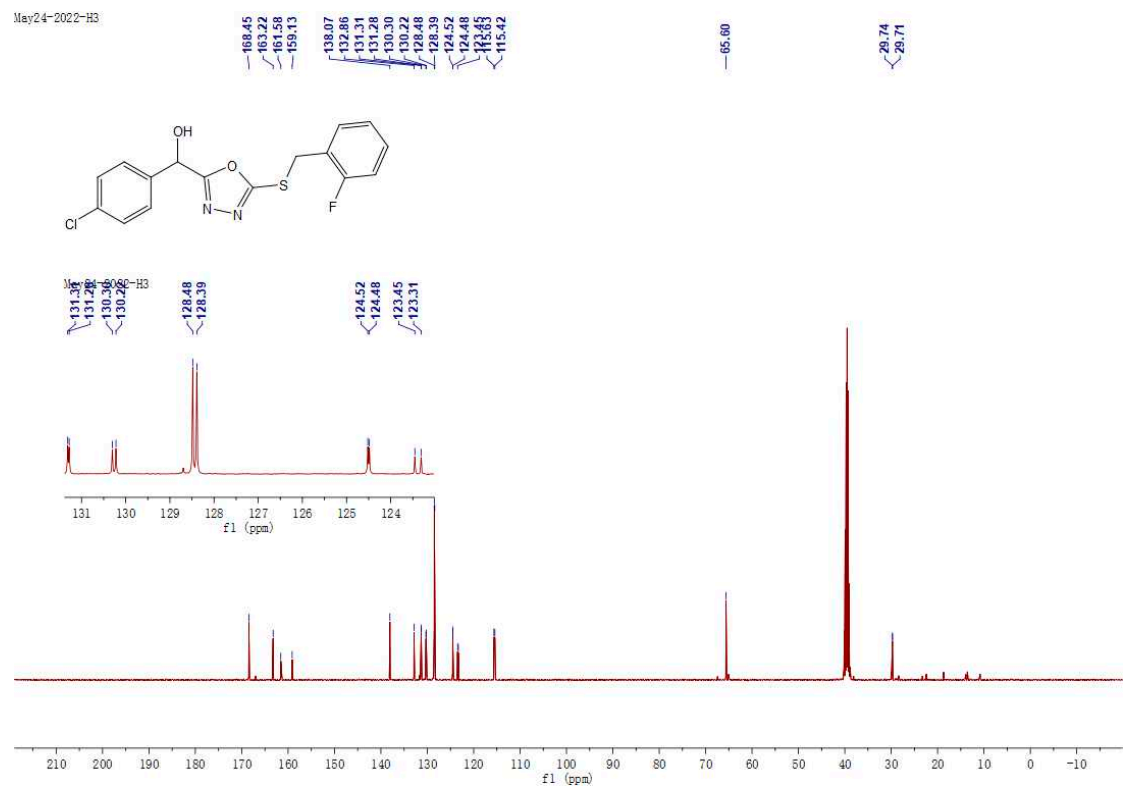

May24-2022-H3

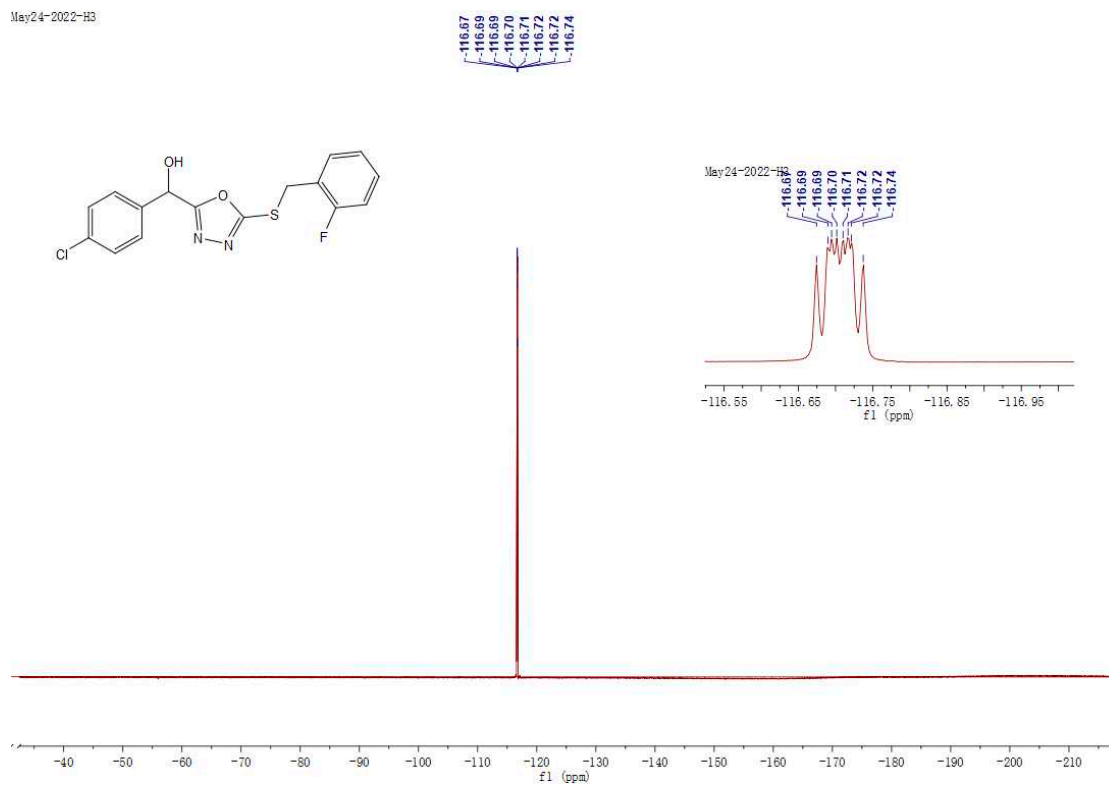

45 #31 RT: 0.32 AV: 1 NL: 9.12E+008  
T: FTMS + p ESI Full ms [150.0000-2200.0000]

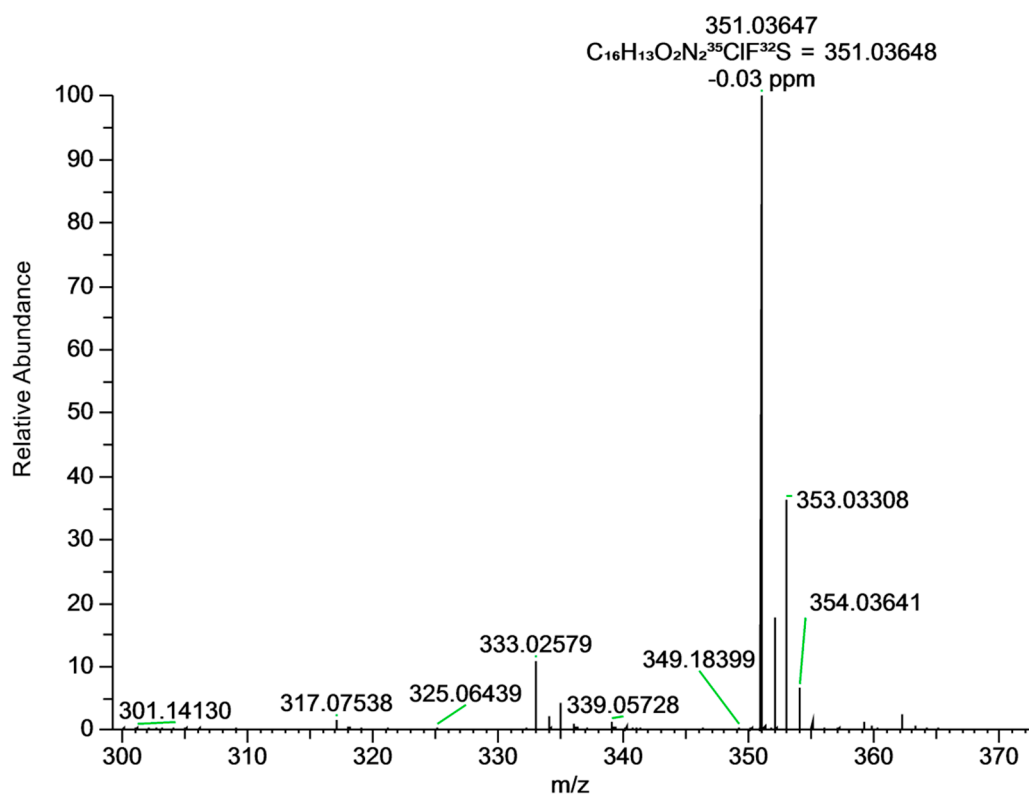

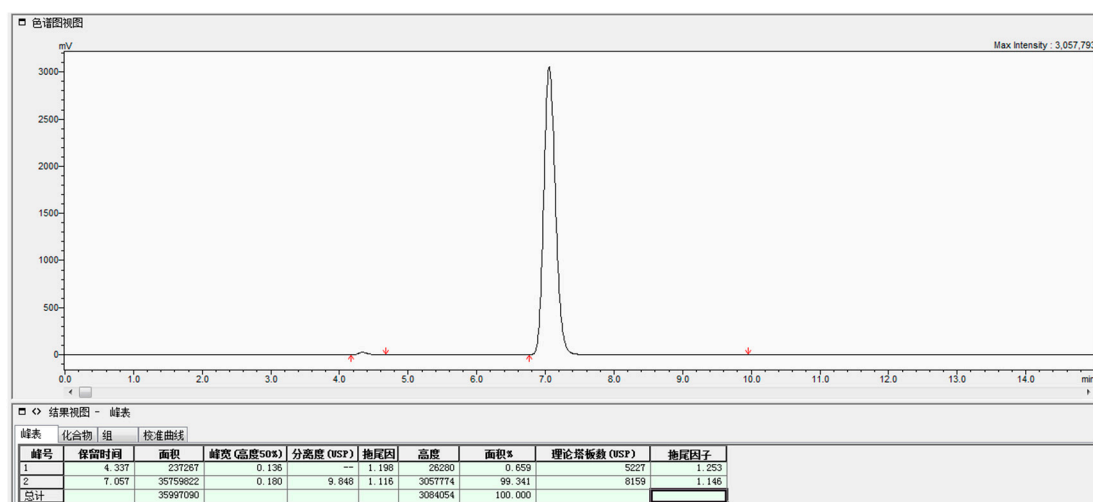

Figure S24.  $^1\text{H}$  NMR,  $^{13}\text{C}$  NMR,  $^{19}\text{F}$  NMR, HRMS and HPLC for **E**<sub>24</sub>.

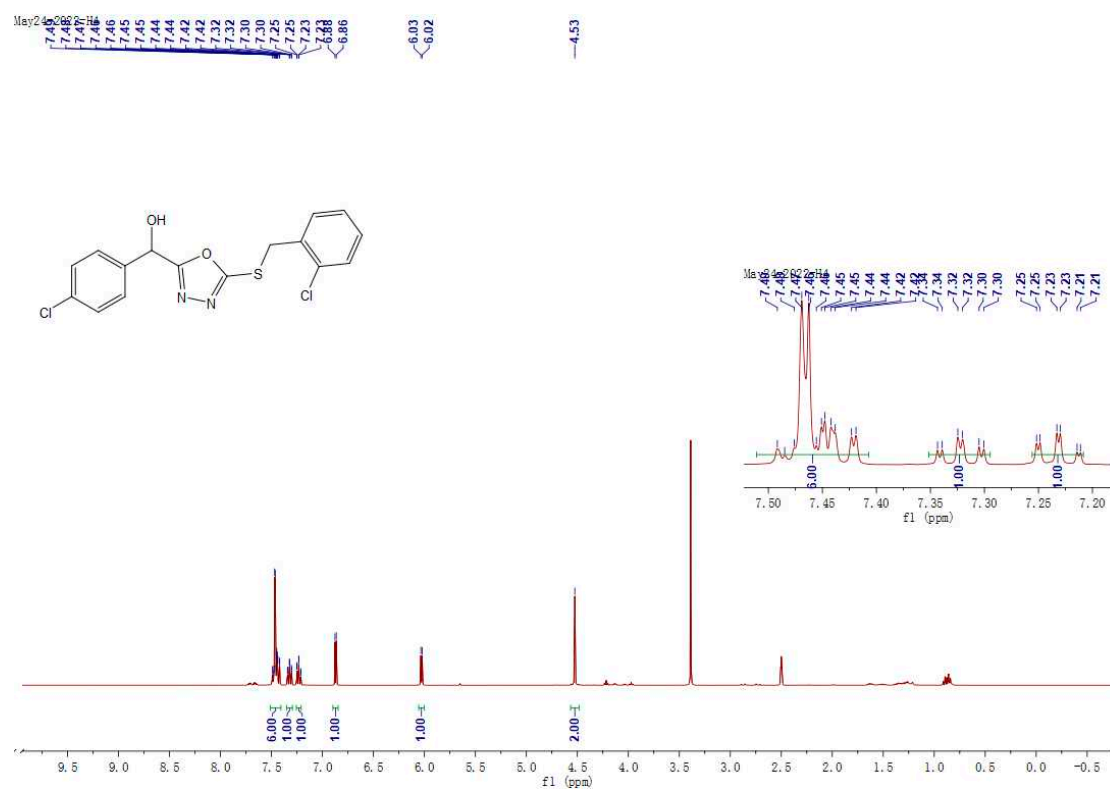

May24-2022-H4

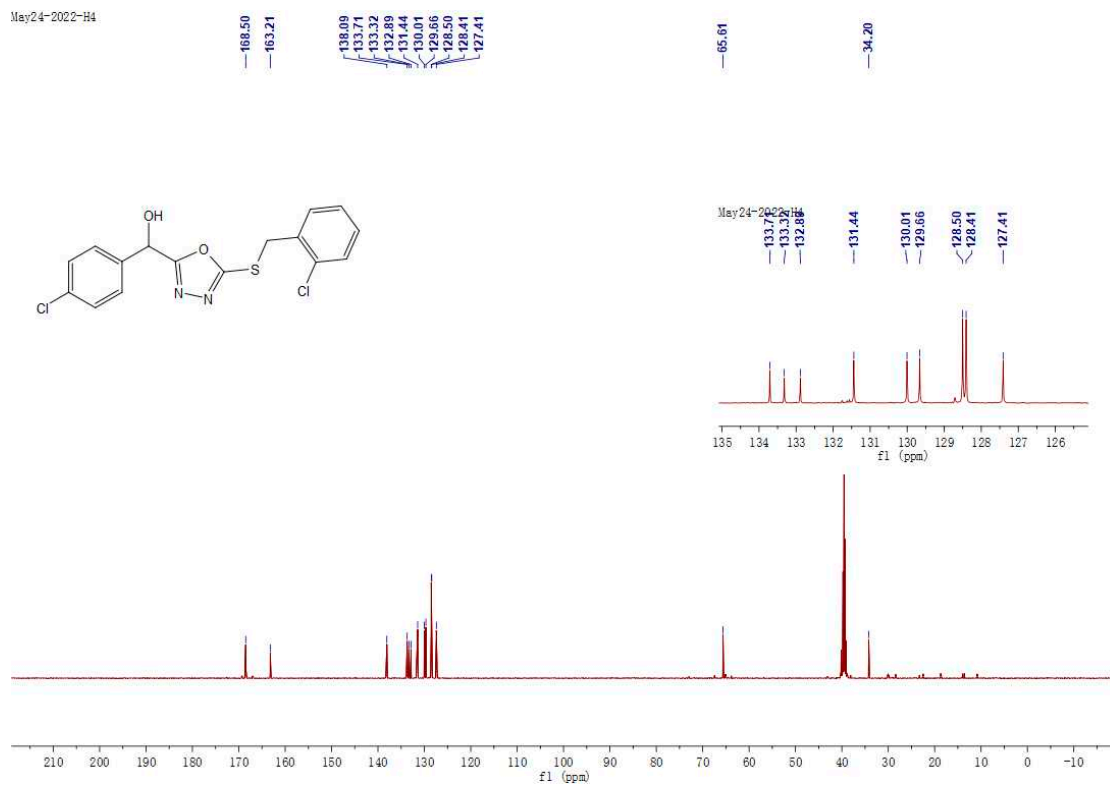

46 #39 RT: 0.39 AV: 1 NL: 8.02E+008  
T: FTMS + p ESI Full ms [150.0000-2200.0000]

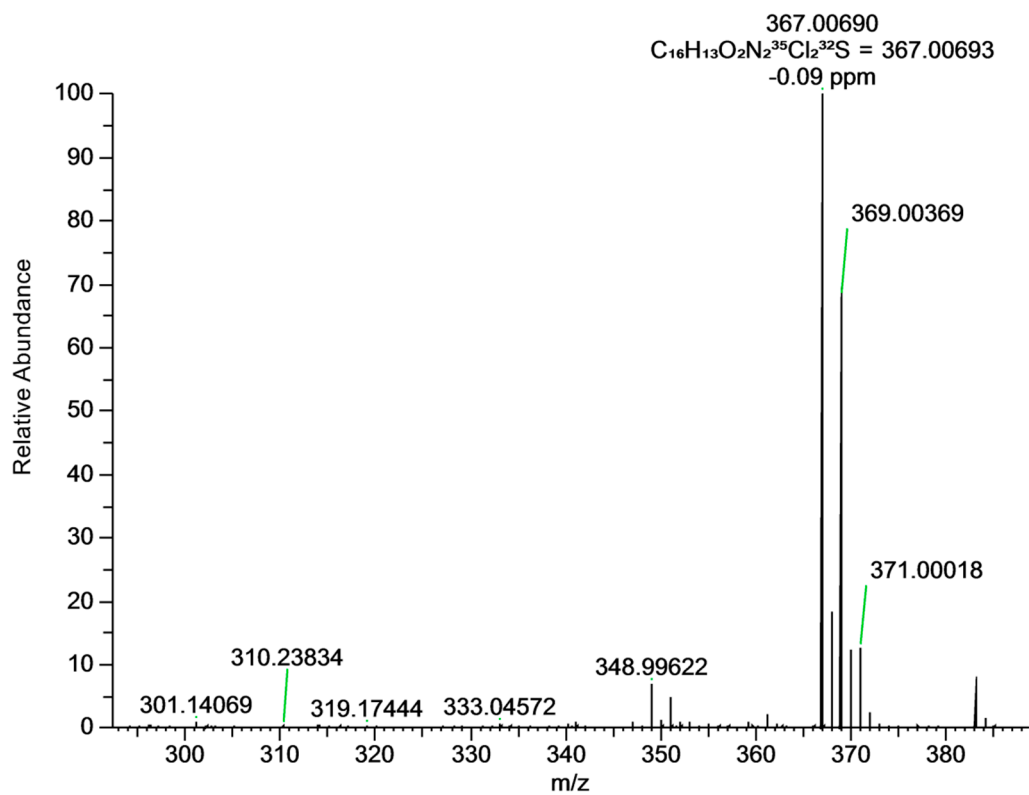



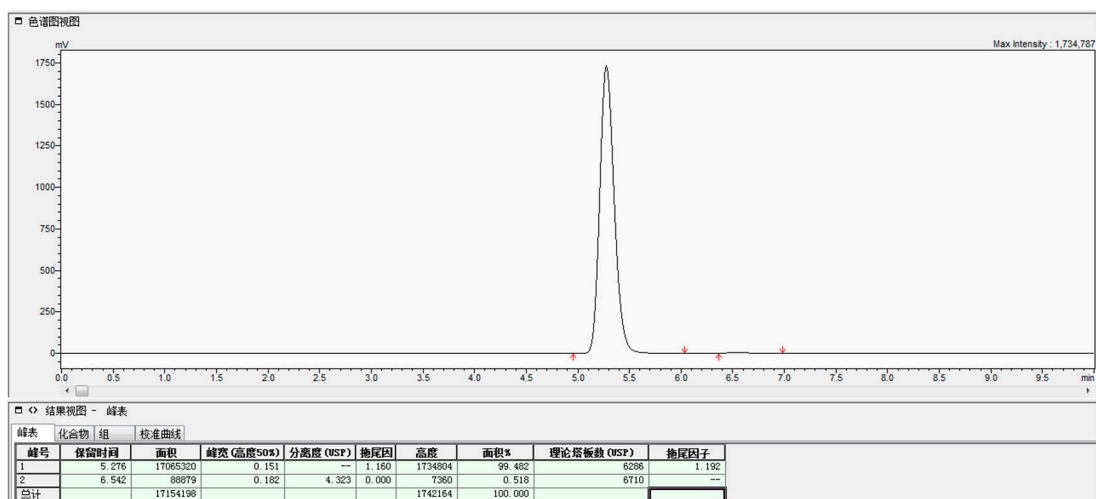

Figure S25.  $^1\text{H}$  NMR,  $^{13}\text{C}$  NMR, HRMS, and HPLC for E<sub>25</sub>.

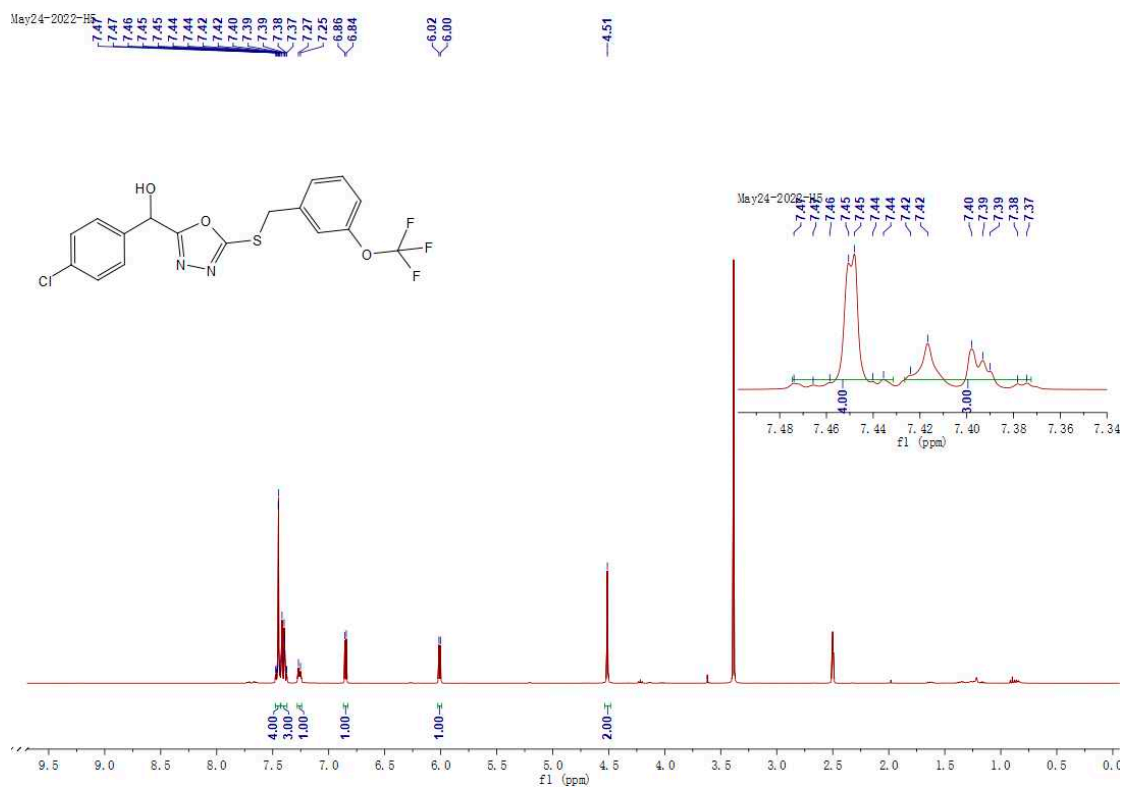

May24-2022-H5

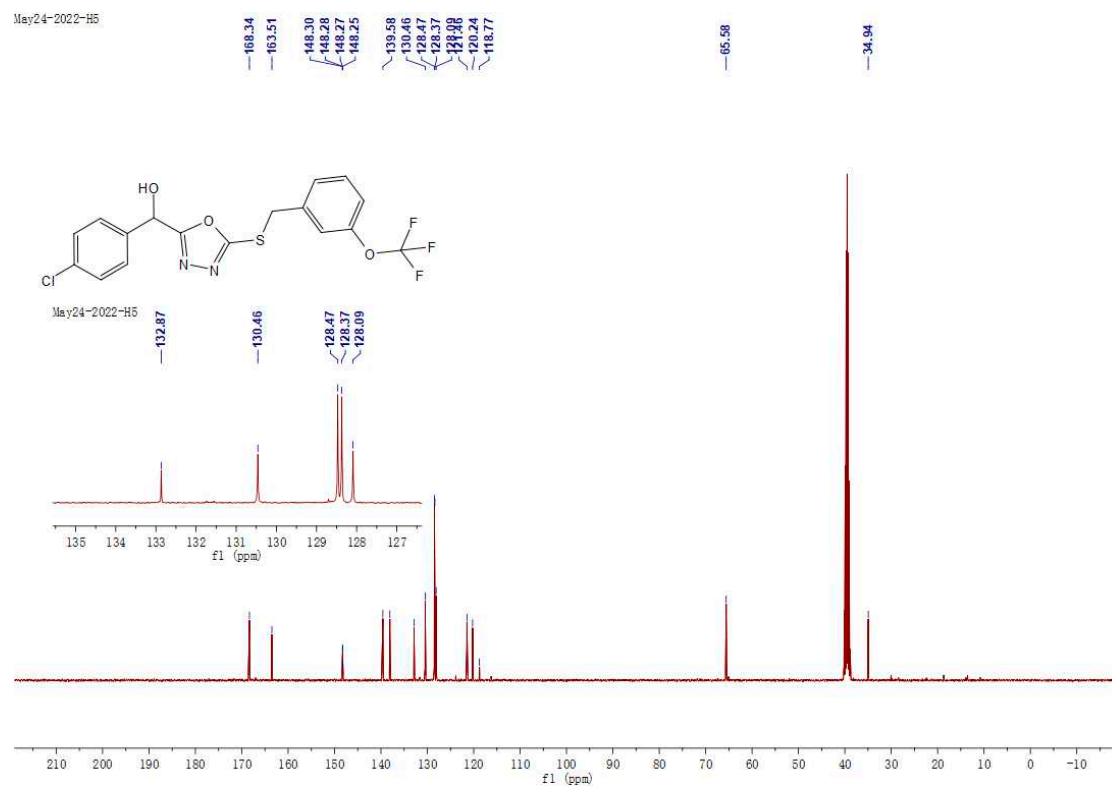

May24-2022-H5

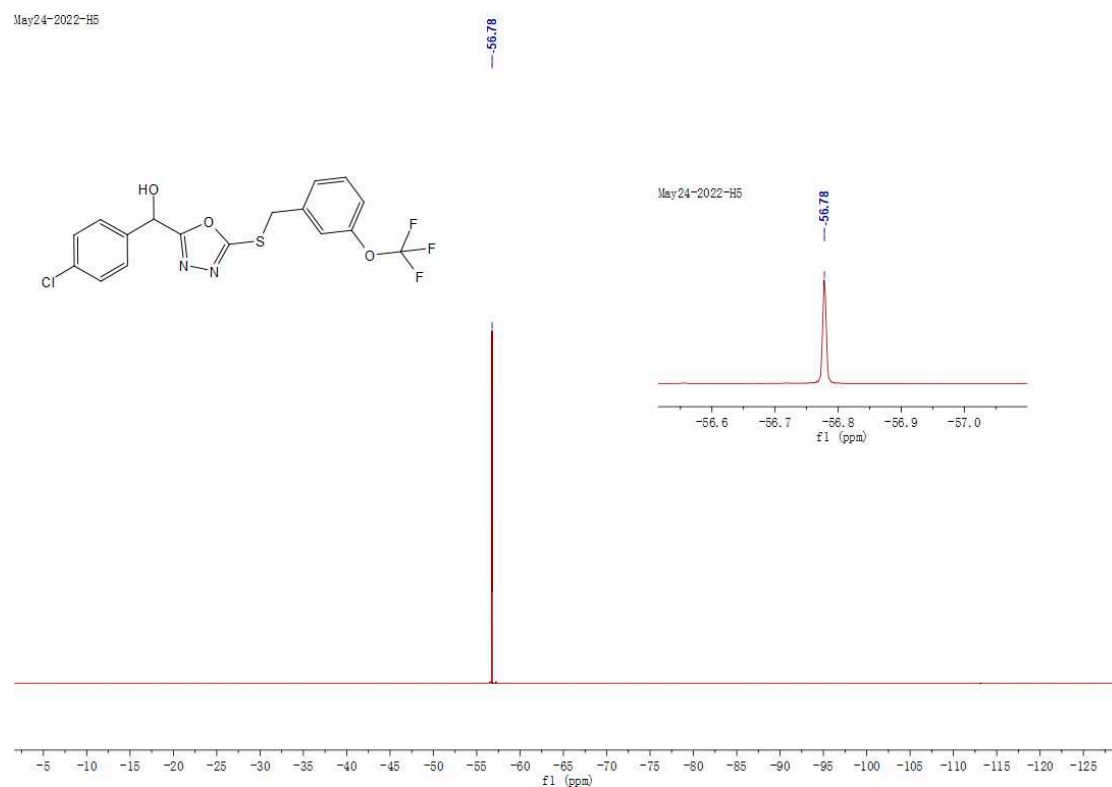

47 #35 RT: 0.36 AV: 1 NL: 1.01E+009  
T: FTMS + p ESI Full ms [150.0000-2200.0000]

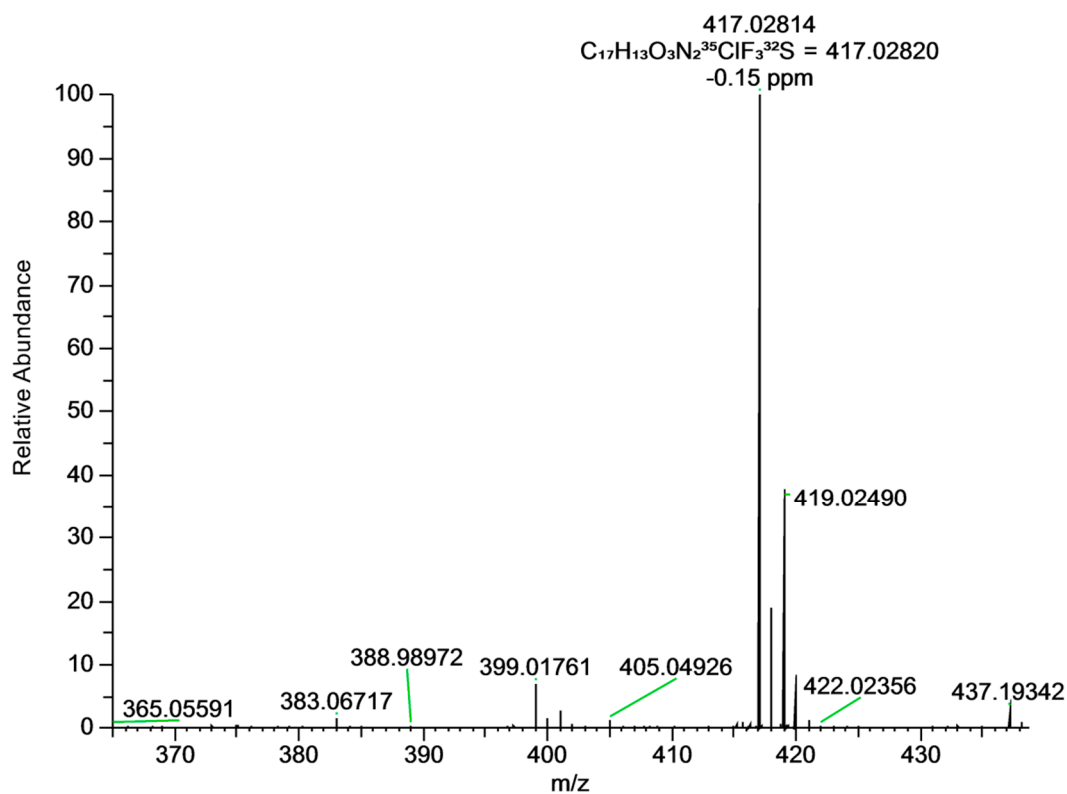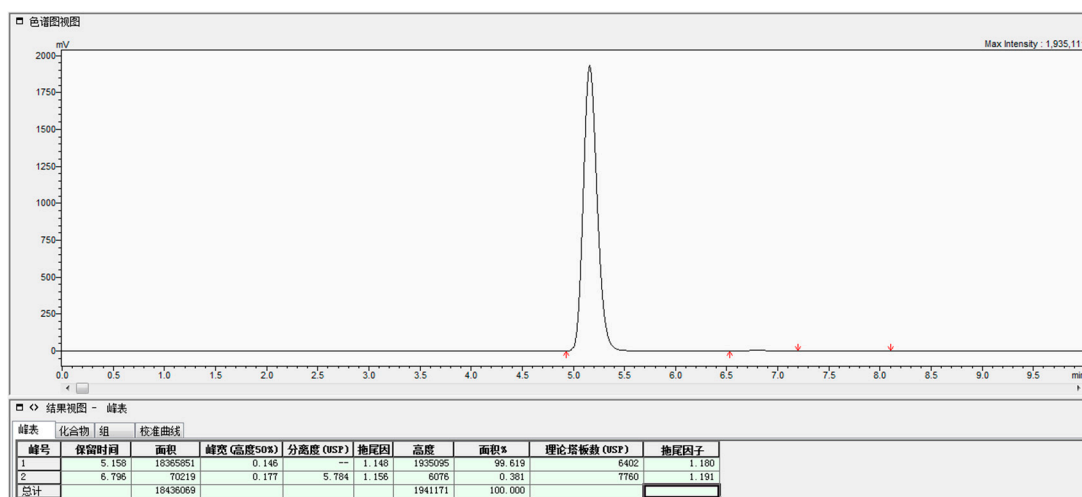

Figure S26.  $^1H$  NMR,  $^{13}C$  NMR,  $^{19}F$  NMR, HRMS and HPLC for **E**<sub>26</sub>.

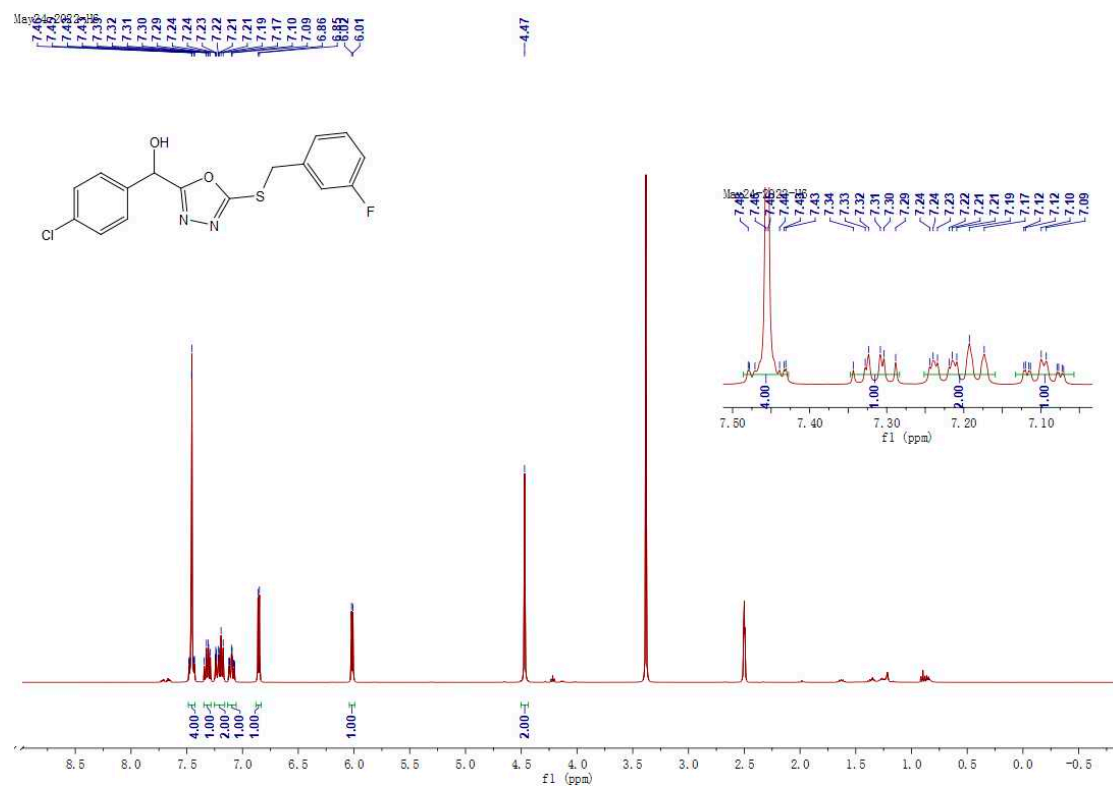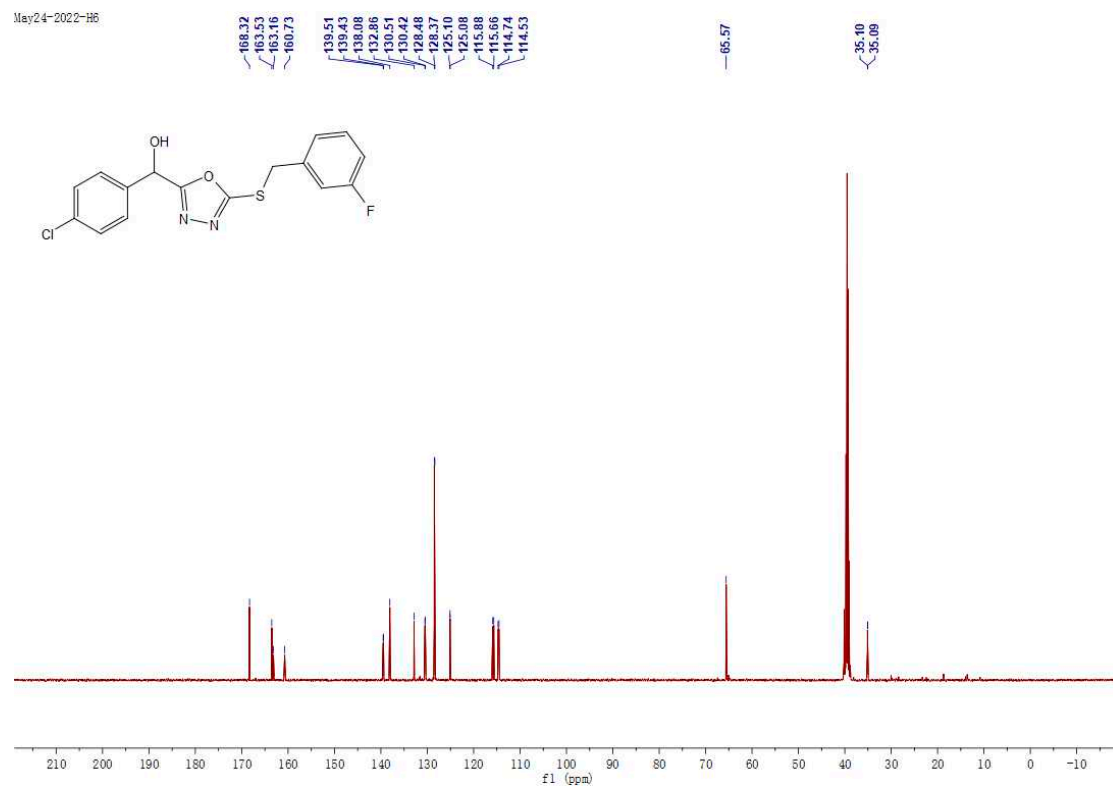

May24-2022-H6

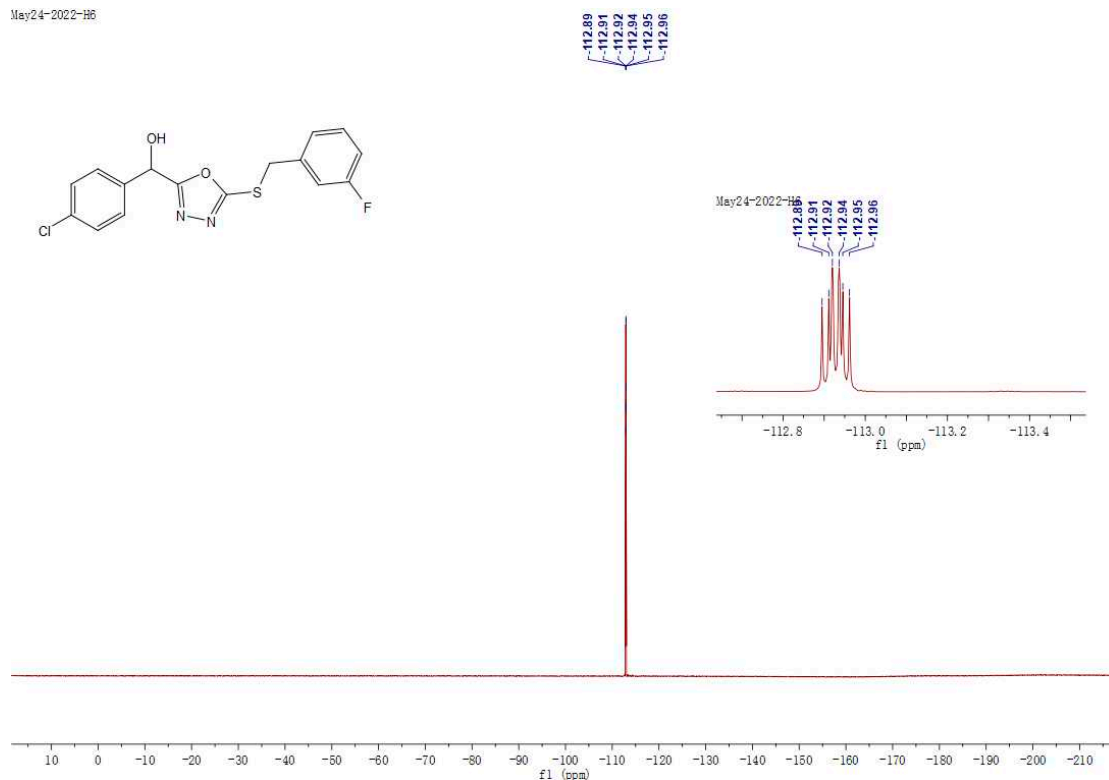

48 #33 RT: 0.34 AV: 1 NL: 7.13E+008  
T: FTMS + p ESI Full ms [150.0000-2200.0000]

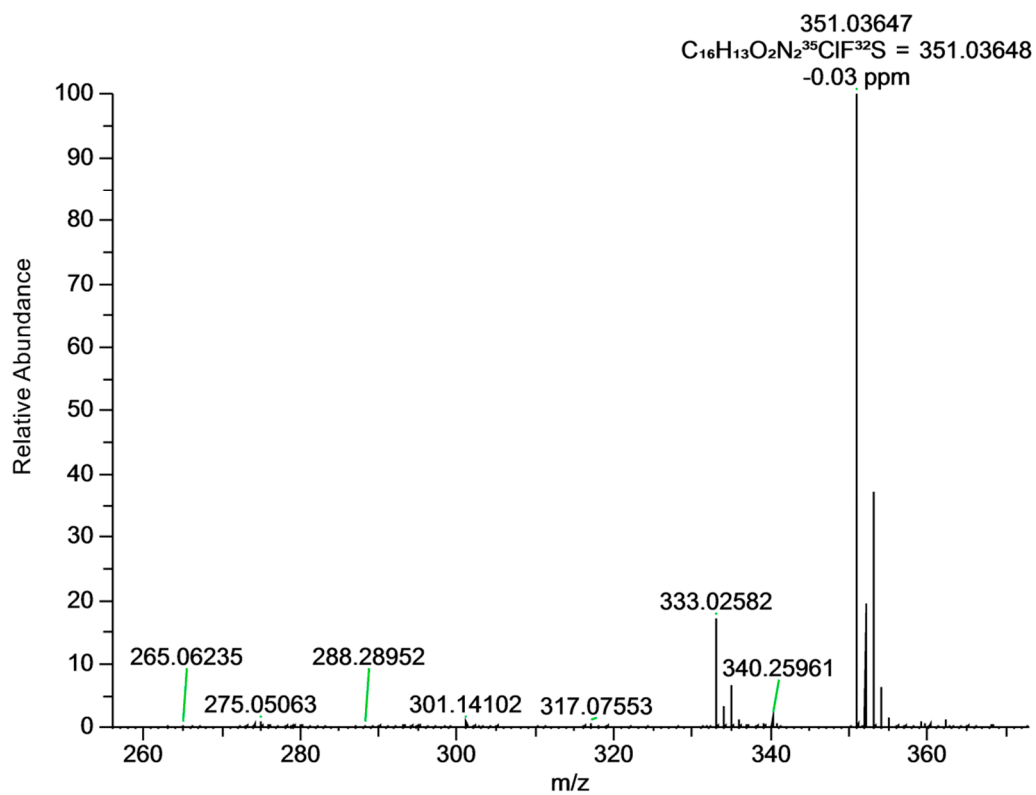

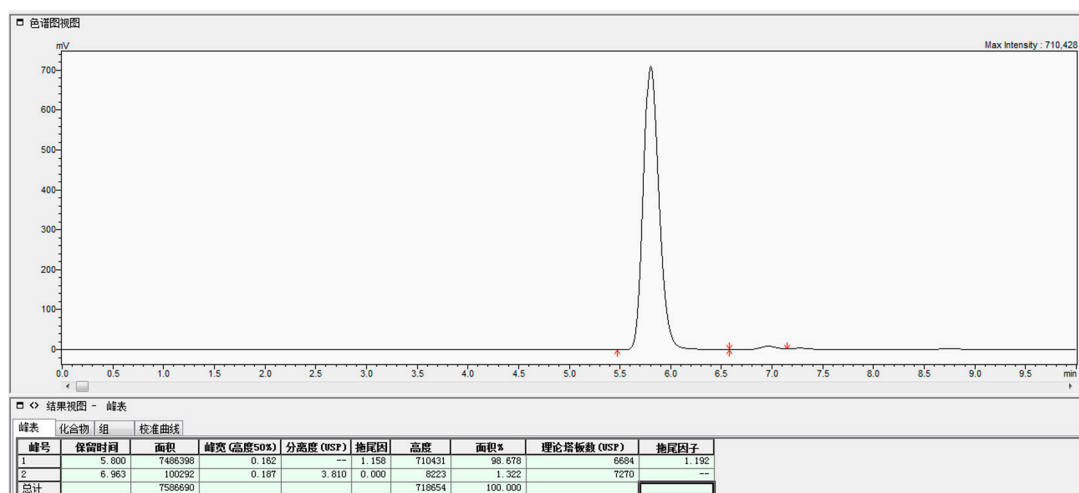

Figure S27.  $^1\text{H}$  NMR,  $^{13}\text{C}$  NMR,  $^{19}\text{F}$  NMR, HRMS and HPLC for **E**<sub>27</sub>.

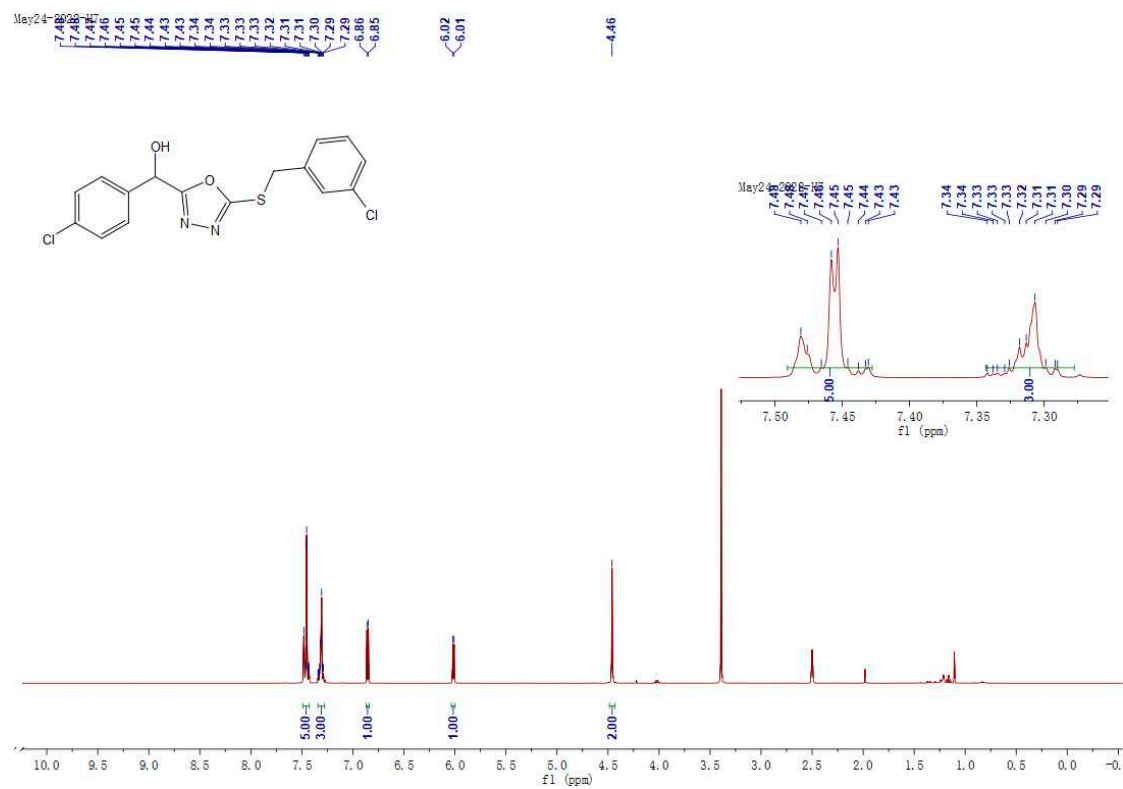

May24-2022-H7

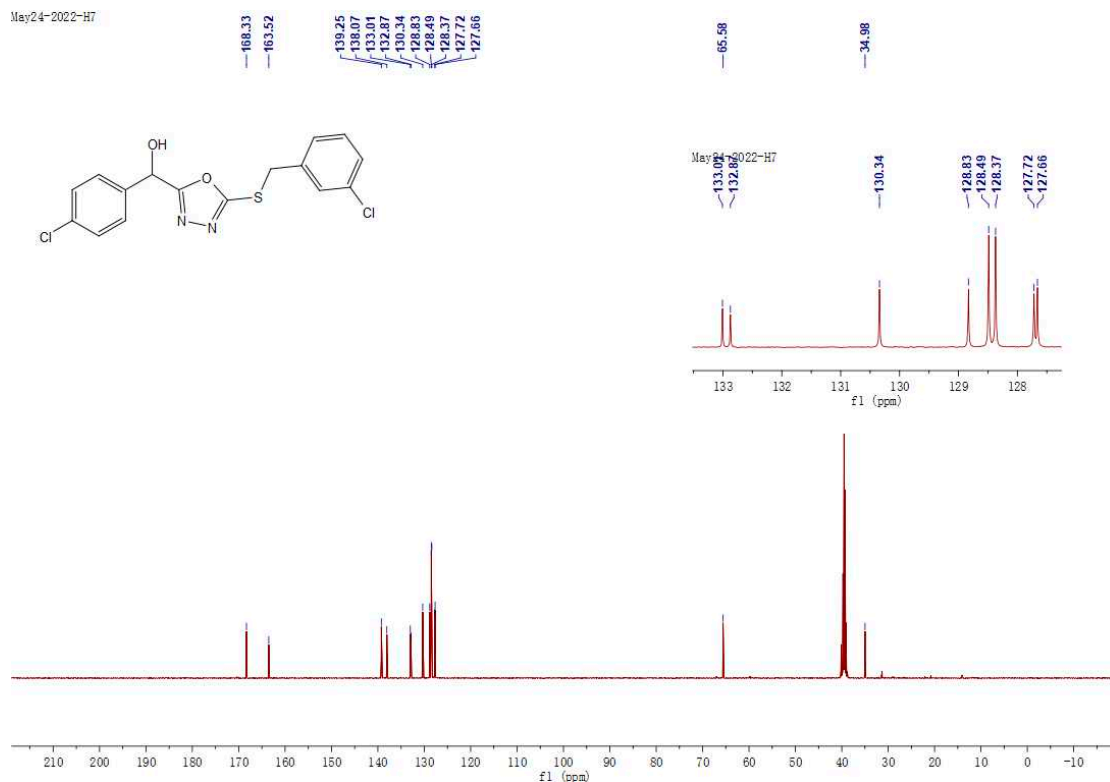

49 #39 RT: 0.39 AV: 1 NL: 4.39E+008  
T: FTMS + p ESI Full ms [150.0000-2200.0000]

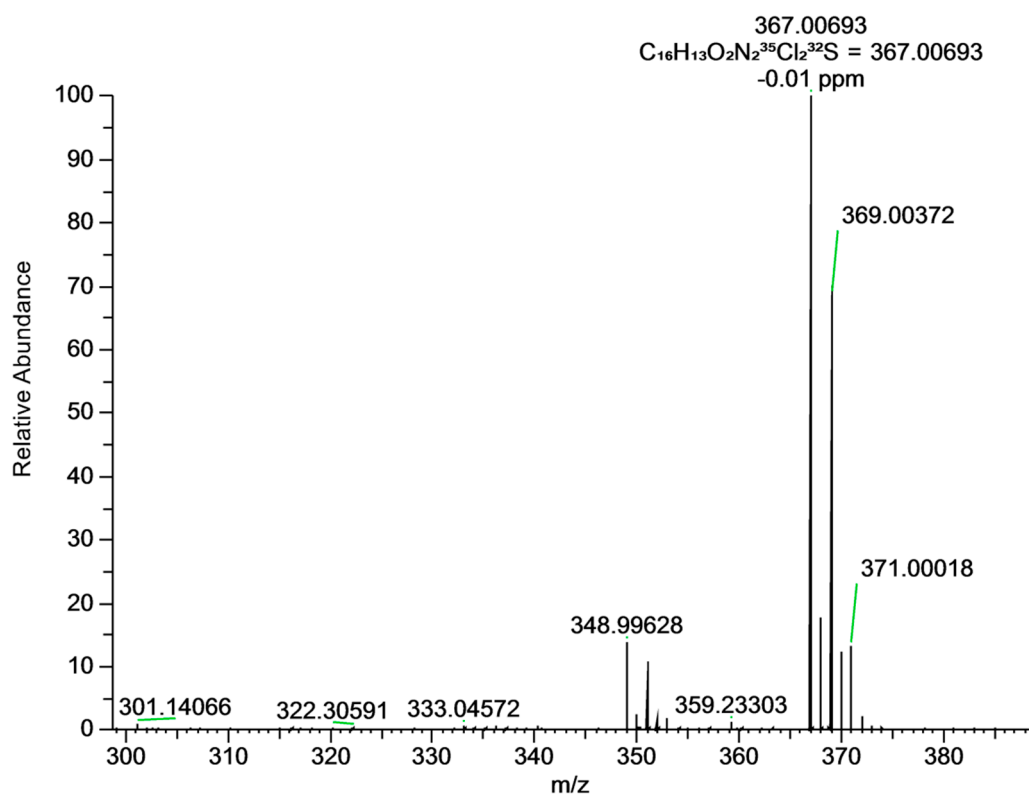

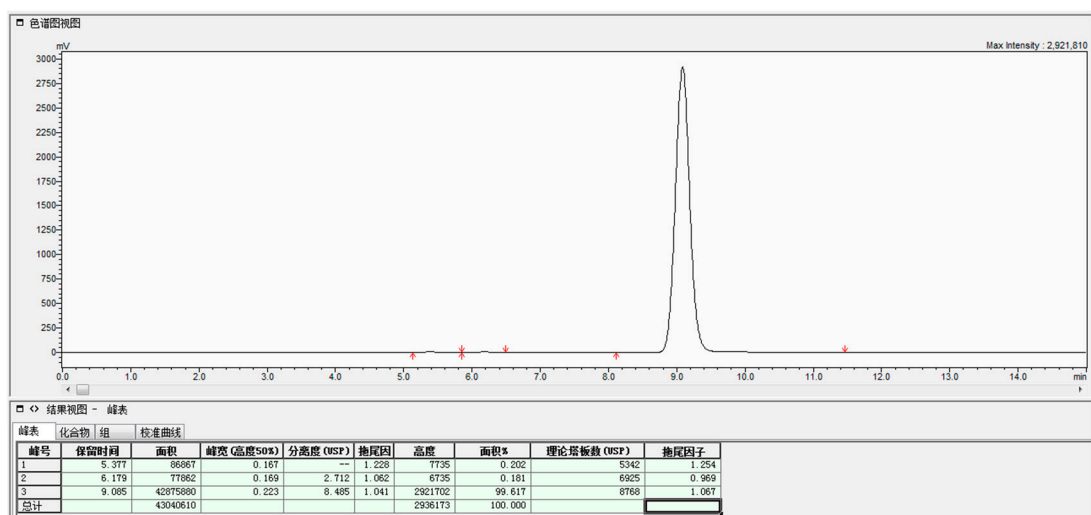

Figure S28.  $^1\text{H}$  NMR,  $^{13}\text{C}$  NMR, HRMS, and HPLC for E<sub>28</sub>.



### 3. Crystallographic data of compound E<sub>9</sub>

Table S1

Crystallographic data of compound D<sub>9</sub>

|                                               |                                                                  |
|-----------------------------------------------|------------------------------------------------------------------|
| Chemical formula                              | C <sub>17</sub> H <sub>15</sub> FN <sub>2</sub> O <sub>2</sub> S |
| Formula weight                                | 330.37                                                           |
| Temperature[K]                                | 273 K                                                            |
| Crystal system                                | Orthorhombic                                                     |
| Space group                                   | P c a 21                                                         |
| a [Å]                                         | 11.2260 (5)                                                      |
| b [Å]                                         | 17.9952 (8)                                                      |
| c [Å]                                         | 7.8108 (3)                                                       |
| α [°]                                         | 90                                                               |
| β [°]                                         | 90                                                               |
| γ [°]                                         | 90                                                               |
| V[Å <sup>3</sup> ]                            | 1577.89 (12)                                                     |
| Z                                             | 4                                                                |
| ρ (calculated)[g/cm <sup>3</sup> ]            | 1.391 g cm <sup>-1</sup>                                         |
| μ [mm <sup>-1</sup> ]                         | 2.018 mm <sup>-1</sup>                                           |
| F (000)                                       | 688.0                                                            |
| Crystal size [mm <sup>3</sup> ]               | 0.22 × 0.21 × 0.18                                               |
| Color, shape                                  | Water clear crystal, Peism                                       |
| Radiation [Å]                                 | MoKα (λ = 1.54178)                                               |
| Theta Min-Max [°]                             | 4.642, 72.080                                                    |
| <i>h, k, l</i>                                | --13 ≤ <i>h</i> ≤ 12, -17 ≤ <i>k</i> ≤ 22, -7 ≤ <i>l</i> ≤ 9     |
| Reflections collected                         | 2728                                                             |
| Independent reflections                       | 2645                                                             |
| Data/restraints/parameters                    | 3843/4/243                                                       |
| Goodness-of-fit                               | 1.076                                                            |
| Final R indexes [ <i>I</i> ≥ 2σ ( <i>I</i> )] | R1 = 0.0435, wR2 = 0.1112                                        |
| Final R indexes [all data]                    | R1 = 0.0443, wR2 = 0.1112                                        |

#### 4. The regression equation of the title compounds with EC<sub>50</sub> values

**Table S2**

The regression equation of the title compounds with EC<sub>50</sub> values against *G. saubinetii* in vitro. <sup>a</sup>

| Compound        | <i>G. saubinetii</i>                   |                      |                |
|-----------------|----------------------------------------|----------------------|----------------|
|                 | EC <sub>50</sub> (mg L <sup>-1</sup> ) | Regression equation  | R <sup>2</sup> |
| E <sub>1</sub>  | 47.4±2.6                               | y = 1.6838x + 2.1778 | 0.977          |
| E <sub>2</sub>  | 37.3±1.4                               | y = 1.4566x + 2.7104 | 0.946          |
| E <sub>6</sub>  | 49.9±0.4                               | y = 1.1125x + 3.1111 | 0.939          |
| E <sub>7</sub>  | 30.6±3.0                               | y = 1.6075x + 2.6106 | 0.975          |
| E <sub>8</sub>  | 79.1±0.6                               | y = 1.2835x + 2.564  | 0.980          |
| E <sub>9</sub>  | 24.6±0.7                               | y = 1.1498x + 3.4001 | 0.931          |
| E <sub>10</sub> | 29.4±0.6                               | y = 1.5341x + 2.7478 | 0.993          |
| E <sub>13</sub> | 20.4±1.3                               | y = 1.3199x + 3.271  | 0.967          |
| E <sub>14</sub> | 21.5±1.0                               | y = 1.3439x + 3.2081 | 0.974          |
| E <sub>17</sub> | 22.0±1.5                               | y = 1.0217x + 3.6276 | 0.905          |
| E <sub>18</sub> | 25.4±0.9                               | y = 1.1308x + 3.4115 | 0.990          |
| E <sub>19</sub> | 56.1±0.9                               | y = 1.1576x + 2.8856 | 0.987          |
| E <sub>20</sub> | 31.6±0.6                               | y = 1.3543x + 2.9688 | 0.972          |
| E <sub>21</sub> | 27.3±2.0                               | y = 0.9419x + 3.6478 | 0.9241         |
| E <sub>22</sub> | 51.1±0.2                               | y=1.8303x+2.1571     | 0.974          |
| E <sub>23</sub> | 32.5±0.9                               | y=1.5487x+2.6594     | 0.941          |
| E <sub>24</sub> | 30.8±1.5                               | y=1.4254x+2.8775     | 0.991          |
| E <sub>25</sub> | 31.3±1.5                               | y=1.3693x+2.9521     | 0.975          |

|                 |          |                  |       |
|-----------------|----------|------------------|-------|
| E <sub>26</sub> | 32.7±1.1 | y=1.5711x+2.6199 | 0.930 |
| E <sub>27</sub> | 25.2±1.0 | y=1.2166x+3.2957 | 0.984 |
| E <sub>28</sub> | 24.2±0.4 | y=1.2832x+3.2237 | 0.972 |

<sup>a</sup> Values are means ± SD of three replicates.

**Table S3**

The regression equation of the title compounds with EC<sub>50</sub> values against *V. dahliae* in vitro. <sup>a</sup>

| Compound        | <i>V. dahliae</i>                      |                      |                |
|-----------------|----------------------------------------|----------------------|----------------|
|                 | EC <sub>50</sub> (mg L <sup>-1</sup> ) | Regression equation  | R <sup>2</sup> |
| E <sub>1</sub>  | 50.7±2.8                               | y = 2.0379x + 1.5258 | 0.997          |
| E <sub>2</sub>  | 37.2±1.2                               | y = 1.7372x + 2.272  | 0.933          |
| E <sub>6</sub>  | 12.7±0.5                               | y = 1.5729x + 3.2621 | 0.970          |
| E <sub>7</sub>  | 14.3±0.1                               | y = 1.0199x + 3.8215 | 0.999          |
| E <sub>8</sub>  | >100                                   | y = 1.1396x + 2.5042 | 0.979          |
| E <sub>9</sub>  | 29.0±2.1                               | y = 1.5996x + 2.6596 | 0.984          |
| E <sub>10</sub> | 37.2±1.0                               | y = 2.9854x + 0.3104 | 0.969          |
| E <sub>13</sub> | 18.5±1.2                               | y = 3.3564x + 0.7478 | 0.901          |
| E <sub>14</sub> | 23.1±0.8                               | y = 2.4461x + 1.6658 | 0.984          |
| E <sub>17</sub> | 16.1±0.2                               | y = 1.382x + 3.332   | 0.974          |
| E <sub>18</sub> | 15.8±1.4                               | y = 1.2028x + 3.5587 | 0.902          |
| E <sub>19</sub> | 65.7±0.7                               | y = 1.4397x + 2.3835 | 0.948          |
| E <sub>20</sub> | 29.6±2.3                               | y = 2.6387x + 1.1189 | 0.951          |
| E <sub>21</sub> | 13.4±0.6                               | y = 1.1821x + 3.6673 | 0.960          |
| E <sub>22</sub> | 61.3±1.6                               | y=1.6208x+ 2.1025    | 0.993          |

|                 |          |                   |       |
|-----------------|----------|-------------------|-------|
| E <sub>23</sub> | 32.3±0.4 | y=1.7528x+2.4201  | 0.997 |
| E <sub>24</sub> | 38.5±1.0 | y=2.2253x+1.4731  | 0.996 |
| E <sub>25</sub> | 33.7±3.5 | y=1.5801x+2.5869  | 0.974 |
| E <sub>26</sub> | 30.4±1.3 | y=1.9004x+2.1816  | 0.958 |
| E <sub>27</sub> | 43.0±1.6 | y=1.6554x+ 2.2961 | 0.970 |
| E <sub>28</sub> | 26.9±0.2 | y=1.4439x+ 2.9346 | 0.917 |

<sup>a</sup> Values are means ± SD of three replicates.

**Table S4**

The regression equation of the title compounds with EC<sub>50</sub> values against *S. sclerotiorum* in vitro. <sup>a</sup>

| Compound        | <i>S. sclerotiorum</i>                 |                      |                |
|-----------------|----------------------------------------|----------------------|----------------|
|                 | EC <sub>50</sub> (mg L <sup>-1</sup> ) | Regression equation  | R <sup>2</sup> |
| E <sub>1</sub>  | 23.0±1.5                               | y = 0.7946x + 4.6336 | 0.962          |
| E <sub>2</sub>  | 27.1±1.5                               | y = 1.0694x + 3.4795 | 0.947          |
| E <sub>6</sub>  | 90.5±3.5                               | y = 1.0506x + 2.9442 | 0.976          |
| E <sub>7</sub>  | 40.1±2.7                               | y = 1.4621x + 2.6562 | 0.957          |
| E <sub>8</sub>  | 13.8±3.1                               | y = 1.1276x + 3.7162 | 0.976          |
| E <sub>9</sub>  | 10.3±1.0                               | y = 1.6198x + 3.3315 | 0.951          |
| E <sub>10</sub> | 21.9±0.4                               | y = 1.5274x + 2.9524 | 0.903          |
| E <sub>13</sub> | 33.5±1.8                               | y = 2.8357x + 0.6741 | 0.965          |
| E <sub>14</sub> | 37.6±1.9                               | y = 1.4025x + 2.7904 | 0.990          |
| E <sub>17</sub> | 27.9±0.2                               | y = 2.137x + 1.9092  | 0.980          |
| E <sub>18</sub> | 8.0±0.3                                | y = 0.7293x + 4.3422 | 0.956          |
| E <sub>19</sub> | 47.8±1.7                               | y = 1.6349x + 2.2543 | 0.998          |

|     |          |                      |       |
|-----|----------|----------------------|-------|
| E20 | 39.1±1.1 | y = 1.779x + 2.1667  | 0.919 |
| E21 | 36.3±0.3 | y = 1.6215x + 2.4701 | 0.988 |
| E22 | 48.5±0.4 | y=1.6458x+ 2.2258    | 0.981 |
| E23 | 81.4±2.1 | y=1.4601x+ 2.2101    | 0.948 |
| E24 | 51.6±5.4 | y=1.3459x+2.6952     | 0.997 |
| E25 | 75.2±3.4 | y=1.5022x+ 2.1818    | 0.958 |
| E26 | 54.0±1.8 | y=1.4843x+2.4292     | 0.986 |
| E27 | 37.2±0.8 | y=1.8064x+2.1623     | 0.968 |
| E28 | 47.9±0.2 | y=1.6462x+2.2342     | 0.984 |

<sup>a</sup> Values are means ± SD of three replicates.

**Table S5**

The regression equation of the title compounds with EC<sub>50</sub> values against *T. cucumeris* in vitro. <sup>a</sup>

| Compound  | <i>T. cucumeris</i>                    |                      |                |
|-----------|----------------------------------------|----------------------|----------------|
|           | EC <sub>50</sub> (mg L <sup>-1</sup> ) | Regression equation  | R <sup>2</sup> |
| E5        | 18.5±0.4                               | y = 1.6449x + 2.9151 | 0.943          |
| E7        | 5.7±0.2                                | y = 0.8461x + 4.3567 | 0.968          |
| E10       | 36.3±1.3                               | y = 1.6703x + 2.3936 | 0.955          |
| E13       | 7.1±0.1                                | y = 1.1273x + 4.0374 | 0.953          |
| E21       | 37.6±1.0                               | y = 1.0234x + 3.3884 | 0.925          |
| hymexazol | 13.8±1.5                               | y = 1.0312x + 3.825  | 0.999          |

<sup>a</sup> Values are means ± SD of three replicates.

**Table S6**

The regression equation of the title compounds with EC<sub>50</sub> values against *P. capsici* in vitro. <sup>a</sup>

| Compound  | <i>P. capsici</i>                      |                      |                |
|-----------|----------------------------------------|----------------------|----------------|
|           | EC <sub>50</sub> (mg L <sup>-1</sup> ) | Regression equation  | R <sup>2</sup> |
| E13       | 42.9±0.7                               | y = 1.95x + 1.8161   | 0.988          |
| E14       | 49.3±1.4                               | y = 1.6695x + 2.1737 | 0.971          |
| E20       | 50.9±1.4                               | y = 1.709x + 2.0825  | 0.965          |
| hymexazol | 17.9±1.3                               | y = 0.7519x + 4.0573 | 0.916          |

<sup>a</sup> Values are means  $\pm$  SD of three replicates.
